# Supplementary material for: Burden of Gastroesophageal reflux disease in China and Global from 1990 to 2021 with forecast to 2041: An analysis and comparison
Source: Research Square preprint supplement (doi:10.21203/rs.3.rs-7227485/v1), 2025-07-29
Supplement: Supplementary file 1 [file 008aa5918e89f742b989c0c8.xlsx]

## Sheet: Table S5
Year	Location	Measure	Forecast.ASR	ASR_Lo_95	ASR_Hi_95	Unit	Forecast.Number	Number_Lo_95	Number_Hi_95
2022	China	DALYs (Disability-Adjusted Life Years)	35.1772800919993	34.9775391900826	35.3770209939161	per 100,000	35.1772800919993	34.9775391900826	35.3770209939161
2022	China	Incidence	1851.89351106055	1842.96465509421	1860.82236702688	per 100,000	1851.89351106055	1842.96465509421	1860.82236702688
2022	China	Prevalence	4561.16675696728	4536.68662235697	4585.64689157759	per 100,000	4561.16675696728	4536.68662235697	4585.64689157759
2023	China	DALYs (Disability-Adjusted Life Years)	35.1577114611023	34.5131554285486	35.802267493656	per 100,000	35.1577114611023	34.5131554285486	35.802267493656
2023	China	Incidence	1859.73603626337	1829.95658631718	1889.51548620955	per 100,000	1859.73603626337	1829.95658631718	1889.51548620955
2023	China	Prevalence	4582.14467961604	4500.51718090668	4663.77217832539	per 100,000	4582.14467961604	4500.51718090668	4663.77217832539
2024	China	DALYs (Disability-Adjusted Life Years)	35.0300661661689	33.8575881008639	36.2025442314739	per 100,000	35.0300661661689	33.8575881008639	36.2025442314739
2024	China	Incidence	1858.15536759898	1802.60735756126	1913.7033776367	per 100,000	1858.15536759898	1802.60735756126	1913.7033776367
2024	China	Prevalence	4577.32052662558	4425.15150854059	4729.48954471056	per 100,000	4577.32052662558	4425.15150854059	4729.48954471056
2025	China	DALYs (Disability-Adjusted Life Years)	34.8281233099001	33.1607232793721	36.495523340428	per 100,000	34.8281233099001	33.1607232793721	36.495523340428
2025	China	Incidence	1845.8275365187	1767.60429171171	1924.0507813257	per 100,000	1845.8275365187	1767.60429171171	1924.0507813257
2025	China	Prevalence	4543.24509213141	4329.13885055067	4757.35133371214	per 100,000	4543.24509213141	4329.13885055067	4757.35133371214
2026	China	DALYs (Disability-Adjusted Life Years)	34.5846921682308	32.5018801797423	36.6675041567192	per 100,000	34.5846921682308	32.5018801797423	36.6675041567192
2026	China	Incidence	1828.62750779756	1733.82200452308	1923.43301107203	per 100,000	1828.62750779756	1733.82200452308	1923.43301107203
2026	China	Prevalence	4495.98616982713	4236.77739193643	4755.19494771784	per 100,000	4495.98616982713	4236.77739193643	4755.19494771784
2027	China	DALYs (Disability-Adjusted Life Years)	34.3290644336992	31.9289796252008	36.7291492421976	per 100,000	34.3290644336992	31.9289796252008	36.7291492421976
2027	China	Incidence	1812.32249794284	1705.80418421701	1918.84081166867	per 100,000	1812.32249794284	1705.80418421701	1918.84081166867
2027	China	Prevalence	4451.25013190637	4160.4206953886	4742.07956842415	per 100,000	4451.25013190637	4160.4206953886	4742.07956842415
2028	China	DALYs (Disability-Adjusted Life Years)	34.0853054502459	31.4660812146574	36.7045296858343	per 100,000	34.0853054502459	31.4660812146574	36.7045296858343
2028	China	Incidence	1798.22311916221	1682.9089943916	1913.53724393282	per 100,000	1798.22311916221	1682.9089943916	1913.53724393282
2028	China	Prevalence	4412.64632379249	4098.32174098071	4726.97090660427	per 100,000	4412.64632379249	4098.32174098071	4726.97090660427
2029	China	DALYs (Disability-Adjusted Life Years)	33.8713488816135	31.1183996621746	36.6242981010523	per 100,000	33.8713488816135	31.1183996621746	36.6242981010523
2029	China	Incidence	1784.65231098036	1662.66447716193	1906.64014479879	per 100,000	1784.65231098036	1662.66447716193	1906.64014479879
2029	China	Prevalence	4375.71092845285	4043.79403376334	4707.62782314235	per 100,000	4375.71092845285	4043.79403376334	4707.62782314235
2030	China	DALYs (Disability-Adjusted Life Years)	33.6987993858421	30.8773023830501	36.5202963886341	per 100,000	33.6987993858421	30.8773023830501	36.5202963886341
2030	China	Incidence	1770.57184390374	1644.19737221066	1896.94631559681	per 100,000	1770.57184390374	1644.19737221066	1896.94631559681
2030	China	Prevalence	4337.70207913719	3994.43976423208	4680.9643940423	per 100,000	4337.70207913719	3994.43976423208	4680.9643940423
2031	China	DALYs (Disability-Adjusted Life Years)	33.5733087861272	30.7255597021552	36.4210578700993	per 100,000	33.5733087861272	30.7255597021552	36.4210578700993
2031	China	Incidence	1757.10354753957	1628.62946235228	1885.57763272686	per 100,000	1757.10354753957	1628.62946235228	1885.57763272686
2031	China	Prevalence	4301.67103637274	3953.17738444425	4650.16468830122	per 100,000	4301.67103637274	3953.17738444425	4650.16468830122
2032	China	DALYs (Disability-Adjusted Life Years)	33.4953717791971	30.6425168044063	36.3482267539879	per 100,000	33.4953717791971	30.6425168044063	36.3482267539879
2032	China	Incidence	1746.2929961958	1617.27462219888	1875.31137019272	per 100,000	1746.2929961958	1617.27462219888	1875.31137019272
2032	China	Prevalence	4273.11178753265	3923.40478763682	4622.81878742847	per 100,000	4273.11178753265	3923.40478763682	4622.81878742847
2033	China	DALYs (Disability-Adjusted Life Years)	33.4613848499432	30.6085003487343	36.3142693511522	per 100,000	33.4613848499432	30.6085003487343	36.3142693511522
2033	China	Incidence	1739.30152220861	1610.27651756713	1868.32652685009	per 100,000	1739.30152220861	1610.27651756713	1868.32652685009
2033	China	Prevalence	4255.10414471517	3905.39699044422	4604.81129898612	per 100,000	4255.10414471517	3905.39699044422	4604.81129898612
2034	China	DALYs (Disability-Adjusted Life Years)	33.4648233205946	30.6076603561744	36.3219862850148	per 100,000	33.4648233205946	30.6076603561744	36.3219862850148
2034	China	Incidence	1735.92294621408	1606.68445053978	1865.16144188838	per 100,000	1735.92294621408	1606.68445053978	1865.16144188838
2034	China	Prevalence	4247.03304278596	3896.54796127237	4597.51812429956	per 100,000	4247.03304278596	3896.54796127237	4597.51812429956
2035	China	DALYs (Disability-Adjusted Life Years)	33.4974125000494	30.6288110691285	36.3660139309702	per 100,000	33.4974125000494	30.6288110691285	36.3660139309702
2035	China	Incidence	1735.37142018033	1605.32110709924	1865.42173326142	per 100,000	1735.37142018033	1605.32110709924	1865.42173326142
2035	China	Prevalence	4246.71320371095	3893.68759998656	4599.73880743533	per 100,000	4246.71320371095	3893.68759998656	4599.73880743533
2036	China	DALYs (Disability-Adjusted Life Years)	33.5501958613277	30.6645915934247	36.4358001292307	per 100,000	33.5501958613277	30.6645915934247	36.4358001292307
2036	China	Incidence	1737.1321372857	1605.50846971227	1868.75580485913	per 100,000	1737.1321372857	1605.50846971227	1868.75580485913
2036	China	Prevalence	4252.67166989088	3895.00329254214	4610.34004723963	per 100,000	4252.67166989088	3895.00329254214	4610.34004723963
2037	China	DALYs (Disability-Adjusted Life Years)	33.6144325343902	30.7098760344642	36.5189890343163	per 100,000	33.6144325343902	30.7098760344642	36.5189890343163
2037	China	Incidence	1741.08031510992	1607.16846061679	1874.99216960304	per 100,000	1741.08031510992	1607.16846061679	1874.99216960304
2037	China	Prevalence	4264.47020508442	3900.29234322049	4628.64806694835	per 100,000	4264.47020508442	3900.29234322049	4628.64806694835
2038	China	DALYs (Disability-Adjusted Life Years)	33.682285181274	30.7603744583228	36.6041959042252	per 100,000	33.682285181274	30.7603744583228	36.6041959042252
2038	China	Incidence	1747.06859972376	1610.43442916671	1883.7027702808	per 100,000	1747.06859972376	1610.43442916671	1883.7027702808
2038	China	Prevalence	4281.61205783348	3909.90198439349	4653.32213127347	per 100,000	4281.61205783348	3909.90198439349	4653.32213127347
2039	China	DALYs (Disability-Adjusted Life Years)	33.7472852279284	30.8119091642471	36.6826612916098	per 100,000	33.7472852279284	30.8119091642471	36.6826612916098
2039	China	Incidence	1754.60732506599	1615.23275557124	1893.98189456074	per 100,000	1754.60732506599	1615.23275557124	1893.98189456074
2039	China	Prevalence	4302.69991169396	3923.59253115838	4681.80729222954	per 100,000	4302.69991169396	3923.59253115838	4681.80729222954
2040	China	DALYs (Disability-Adjusted Life Years)	33.8045838999682	30.8603633048998	36.7488044950365	per 100,000	33.8045838999682	30.8603633048998	36.7488044950365
2040	China	Incidence	1762.93815351182	1621.17307678789	1904.70323023575	per 100,000	1762.93815351182	1621.17307678789	1904.70323023575
2040	China	Prevalence	4325.64029195649	3940.24422943319	4711.03635447979	per 100,000	4325.64029195649	3940.24422943319	4711.03635447979
2041	China	DALYs (Disability-Adjusted Life Years)	33.8510136911947	30.9020401843984	36.7999871979909	per 100,000	33.8510136911947	30.9020401843984	36.7999871979909
2041	China	Incidence	1771.31861449768	1627.72111189846	1914.9161170969	per 100,000	1771.31861449768	1627.72111189846	1914.9161170969
2041	China	Prevalence	4348.40482632831	3958.33519949366	4738.47445316297	per 100,000	4348.40482632831	3958.33519949366	4738.47445316297
2022	Global	DALYs (Disability-Adjusted Life Years)	75.8374659977233	75.7256522761332	75.9492797193133	per 100,000	75.8374659977233	75.7256522761332	75.9492797193133
2022	Global	Incidence	3891.00104929614	3886.61759761187	3895.38450098041	per 100,000	3891.00104929614	3886.61759761187	3895.38450098041
2022	Global	Prevalence	9862.00525457949	9849.05718135915	9874.95332779983	per 100,000	9862.00525457949	9849.05718135915	9874.95332779983
2023	Global	DALYs (Disability-Adjusted Life Years)	76.2832600139905	75.9269924160073	76.6395276119737	per 100,000	76.2832600139905	75.9269924160073	76.6395276119737
2023	Global	Incidence	3900.39268355347	3884.76152201389	3916.02384509306	per 100,000	3900.39268355347	3884.76152201389	3916.02384509306
2023	Global	Prevalence	9886.04360317865	9839.76680390487	9932.32040245242	per 100,000	9886.04360317865	9839.76680390487	9932.32040245242
2024	Global	DALYs (Disability-Adjusted Life Years)	76.7798992614023	76.0834865862049	77.4763119365996	per 100,000	76.7798992614023	76.0834865862049	77.4763119365996
2024	Global	Incidence	3909.78431781081	3877.82149643297	3941.74713918864	per 100,000	3909.78431781081	3877.82149643297	3941.74713918864
2024	Global	Prevalence	9910.08195177781	9815.50379608236	10004.6601074733	per 100,000	9910.08195177781	9815.50379608236	10004.6601074733
2025	Global	DALYs (Disability-Adjusted Life Years)	77.2014216661563	76.1354552104491	78.2673881218635	per 100,000	77.2014216661563	76.1354552104491	78.2673881218635
2025	Global	Incidence	3919.17595206814	3867.38154228302	3970.97036185326	per 100,000	3919.17595206814	3867.38154228302	3970.97036185326
2025	Global	Prevalence	9934.12030037697	9780.9065960767	10087.3340046772	per 100,000	9934.12030037697	9780.9065960767	10087.3340046772
2026	Global	DALYs (Disability-Adjusted Life Years)	77.5077903130636	76.0881212074565	78.9274594186708	per 100,000	77.5077903130636	76.0881212074565	78.9274594186708
2026	Global	Incidence	3928.56758632547	3854.00868321521	4003.12648943573	per 100,000	3928.56758632547	3854.00868321521	4003.12648943573
2026	Global	Prevalence	9958.15864897612	9737.64536697909	10178.6719309732	per 100,000	9958.15864897612	9737.64536697909	10178.6719309732
2027	Global	DALYs (Disability-Adjusted Life Years)	77.7524401701968	76.0003197992376	79.504560541156	per 100,000	77.7524401701968	76.0003197992376	79.504560541156
2027	Global	Incidence	3937.9592205828	3838.04771267338	4037.87072849222	per 100,000	3937.9592205828	3838.04771267338	4037.87072849222
2027	Global	Prevalence	9982.19699757528	9686.73741823499	10277.6565769156	per 100,000	9982.19699757528	9686.73741823499	10277.6565769156
2028	Global	DALYs (Disability-Adjusted Life Years)	78.0201879697785	75.9340940263631	80.1062819131939	per 100,000	78.0201879697785	75.9340940263631	80.1062819131939
2028	Global	Incidence	3947.35085484013	3819.74176800681	4074.95994167345	per 100,000	3947.35085484013	3819.74176800681	4074.95994167345
2028	Global	Prevalence	10006.2353461744	9628.90056633029	10383.5701260186	per 100,000	10006.2353461744	9628.90056633029	10383.5701260186
2029	Global	DALYs (Disability-Adjusted Life Years)	78.3579123616157	75.9077756675247	80.8080490557067	per 100,000	78.3579123616157	75.9077756675247	80.8080490557067
2029	Global	Incidence	3956.74248909746	3799.27528952765	4114.20968866727	per 100,000	3956.74248909746	3799.27528952765	4114.20968866727
2029	Global	Prevalence	10030.2736947736	9564.67949685068	10495.8678926965	per 100,000	10030.2736947736	9564.67949685068	10495.8678926965
2030	Global	DALYs (Disability-Adjusted Life Years)	78.7500559314249	75.8904010835351	81.6097107793147	per 100,000	78.7500559314249	75.8904010835351	81.6097107793147
2030	Global	Incidence	3966.13412335479	3776.79472142069	4155.4735252889	per 100,000	3966.13412335479	3776.79472142069	4155.4735252889
2030	Global	Prevalence	10054.3120433728	9494.50675879926	10614.1173279463	per 100,000	10054.3120433728	9494.50675879926	10614.1173279463
2031	Global	DALYs (Disability-Adjusted Life Years)	79.1455046795369	75.8359030364568	82.455106322617	per 100,000	79.1455046795369	75.8359030364568	82.455106322617
2031	Global	Incidence	3975.52575761213	3752.42011085726	4198.63140436699	per 100,000	3975.52575761213	3752.42011085726	4198.63140436699
2031	Global	Prevalence	10078.3503919719	9418.74	10737.9638128518	per 100,000	10078.3503919719	9418.74	10737.9638128518
2032	Global	DALYs (Disability-Adjusted Life Years)	79.503522545876	75.7206873707134	83.2863577210387	per 100,000	79.503522545876	75.7206873707134	83.2863577210387
2032	Global	Incidence	3984.91739186946	3726.25224070672	4243.58254303219	per 100,000	3984.91739186946	3726.25224070672	4243.58254303219
2032	Global	Prevalence	10102.3887405711	9337.66786817443	10867.1096129677	per 100,000	10102.3887405711	9337.66786817443	10867.1096129677
2033	Global	DALYs (Disability-Adjusted Life Years)	79.8206844852415	75.5554489466573	84.0859200238258	per 100,000	79.8206844852415	75.5554489466573	84.0859200238258
2033	Global	Incidence	3994.30902612679	3698.37730836165	4290.24074389193	per 100,000	3994.30902612679	3698.37730836165	4290.24074389193
2033	Global	Prevalence	10126.4270891702	9251.55410976518	11001.3000685753	per 100,000	10126.4270891702	9251.55410976518	11001.3000685753
2034	Global	DALYs (Disability-Adjusted Life Years)	80.124034838779	75.370057204927	84.878012472631	per 100,000	80.124034838779	75.370057204927	84.878012472631
2034	Global	Incidence	4003.70066038412	3668.87014640382	4338.53117436442	per 100,000	4003.70066038412	3668.87014640382	4338.53117436442
2034	Global	Prevalence	10150.4654377694	9160.61678889374	11140.314086645	per 100,000	10150.4654377694	9160.61678889374	11140.314086645
2035	Global	DALYs (Disability-Adjusted Life Years)	80.4438704455796	75.1885907300307	85.6991501611285	per 100,000	80.4438704455796	75.1885907300307	85.6991501611285
2035	Global	Incidence	4013.09229464145	3637.79652463737	4388.38806464554	per 100,000	4013.09229464145	3637.79652463737	4388.38806464554
2035	Global	Prevalence	10174.5037863686	9065.05022903646	11283.9573437006	per 100,000	10174.5037863686	9065.05022903646	11283.9573437006
2036	Global	DALYs (Disability-Adjusted Life Years)	80.7909678817054	75.0140302611745	86.5679055022362	per 100,000	80.7909678817054	75.0140302611745	86.5679055022362
2036	Global	Incidence	4022.48392889878	3605.21484632781	4439.75301146976	per 100,000	4022.48392889878	3605.21484632781	4439.75301146976
2036	Global	Prevalence	10198.5421349677	8965.02699314138	11432.057276794	per 100,000	10198.5421349677	8965.02699314138	11432.057276794
2037	Global	DALYs (Disability-Adjusted Life Years)	81.1536505160871	74.8314992872545	87.4758017449198	per 100,000	81.1536505160871	74.8314992872545	87.4758017449198
2037	Global	Incidence	4031.87556315612	3571.17742991641	4492.57369639583	per 100,000	4031.87556315612	3571.17742991641	4492.57369639583
2037	Global	Prevalence	10222.5804835669	8860.70166890344	11584.4592982303	per 100,000	10222.5804835669	8860.70166890344	11584.4592982303
2038	Global	DALYs (Disability-Adjusted Life Years)	81.5118631983929	74.6236143300977	88.4001120666881	per 100,000	81.5118631983929	74.6236143300977	88.4001120666881
2038	Global	Incidence	4041.26719741345	3535.73149827439	4546.8028965525	per 100,000	4041.26719741345	3535.73149827439	4546.8028965525
2038	Global	Prevalence	10246.618832166	8752.21379053453	11741.0238737975	per 100,000	10246.618832166	8752.21379053453	11741.0238737975
2039	Global	DALYs (Disability-Adjusted Life Years)	81.8538025901464	74.3839045749789	89.323700605314	per 100,000	81.8538025901464	74.3839045749789	89.323700605314
2039	Global	Incidence	4050.65883167078	3498.91995621586	4602.3977071257	per 100,000	4050.65883167078	3498.91995621586	4602.3977071257
2039	Global	Prevalence	10270.6571807652	8639.69013529105	11901.6242262393	per 100,000	10270.6571807652	8639.69013529105	11901.6242262393
2040	Global	DALYs (Disability-Adjusted Life Years)	82.1824103702286	74.1190782632694	90.2457424771877	per 100,000	82.1824103702286	74.1190782632694	90.2457424771877
2040	Global	Incidence	4060.05046592811	3460.78201127566	4659.31892058056	per 100,000	4060.05046592811	3460.78201127566	4659.31892058056
2040	Global	Prevalence	10294.6955293643	8523.24655714692	12066.1445015818	per 100,000	10294.6955293643	8523.24655714692	12066.1445015818
2041	Global	DALYs (Disability-Adjusted Life Years)	82.5095561819565	73.841296093949	91.177816269964	per 100,000	82.5095561819565	73.841296093949	91.177816269964
2041	Global	Incidence	4069.44210018544	3421.35367621684	4717.53052415405	per 100,000	4069.44210018544	3421.35367621684	4717.53052415405
2041	Global	Prevalence	10318.7338779635	8402.98947117788	12234.4782847491	per 100,000	10318.7338779635	8402.98947117788	12234.4782847491
