# Supplementary material for: Burden of Gastroesophageal reflux disease in China and Global from 1990 to 2021 with forecast to 2041: An analysis and comparison
Source: Research Square preprint supplement (doi:10.21203/rs.3.rs-7227485/v1), 2025-07-29
Supplement: Supplementary file 2 [file 0140d22e775be1bb628a99b1.xlsx]

## Sheet: Sheet1
Location	Measure	Sex	1990 All-ages numbers	1990 ASR per 100,000 people	2021 All-ages numbers	2021 ASR per 100,000 people	PC number	AAPC 95%UI	PC rate	AAPC 95%UI rate
China	DALYs	Both	393858 (199884, 694580)	35.27 (17.69, 62.79)	626248 (311714, 1115892)	35.12 (17.63, 62.34)	0.59	1.46% (1.37%, 1.56%)	-0.004	-0.09% (-0.22%, 0.05%)
	DALYs (Disability-Adjusted Life Years)	Female	205258 (103586, 358792)	37.69 (18.98, 66.54)	333822 (168006, 598601)	37.56 (18.91, 66.39)	0.626	1.55% (1.47%, 1.64%)	-0.003	-0.09% (-0.23%, 0.05%)
	DALYs (Disability-Adjusted Life Years)	Male	188600 (96082, 333434)	32.92 (16.55, 58.93)	292426 (146508, 524768)	32.73 (16.5, 58.49)	0.551	1.36% (1.26%, 1.47%)	-0.006	-0.09% (-0.23%, 0.05%)
	Incidence	Both	20863747 (18034679, 23688721)	1851.79 (1617.16, 2089.3)	32387866 (27851900, 36711150)	1844.31 (1605.06, 2084.12)	0.552	1.39% (1.31%, 1.48%)	-0.004	-0.08% (-0.21%, 0.05%)
	Incidence	Female	10905300 (9480937, 12406912)	1984.69 (1731.35, 2242.53)	17296770 (15002039, 19545903)	1976.52 (1721.62, 2238.43)	0.586	1.48% (1.4%, 1.56%)	-0.004	-0.09% (-0.22%, 0.04%)
	Incidence	Male	9958447 (8604377, 11344758)	1723.16 (1499, 1946.81)	15091096 (12967303, 17086795)	1715.44 (1488.38, 1938.76)	0.515	1.3% (1.2%, 1.4%)	-0.004	-0.08% (-0.21%, 0.05%)
	Prevalence	Both	50632181 (44030373, 58122909)	4562.63 (3972.15, 5176.18)	81327260 (70795879, 91949301)	4540.66 (3950.76, 5156.56)	0.606	1.49% (1.4%, 1.59%)	-0.005	-0.09% (-0.23%, 0.05%)
	Prevalence	Female	26516787 (23036455, 30242362)	4896.2 (4237.55, 5542.33)	43560404 (37677356, 49056304)	4872.79 (4216.67, 5524.77)	0.643	1.59% (1.49%, 1.68%)	-0.005	-0.09% (-0.23%, 0.05%)
	Prevalence	Male	24115394 (20923782, 27745683)	4237.3 (3714.43, 4814.59)	37766856 (32806751, 43041961)	4214.58 (3685.86, 4797.01)	0.566	1.39% (1.29%, 1.5%)	-0.005	-0.09% (-0.23%, 0.05%)
Global	DALYs	Both	3472703 (1752693, 6128627)	73.01 (36.75, 129.66)	6336162 (3189794, 11241353)	75.56 (38.05, 133.87)	0.825	1.96% (1.94%, 1.98%)	0.035	0.08% (0.04%, 0.12%)
Global	DALYs (Disability-Adjusted Life Years)	Female	1815102 (918529, 3195138)	75.62 (38.18, 133.94)	3314963 (1673914, 5863205)	78.14 (39.48, 137.95)	0.826	1.95% (1.93%, 1.98%)	0.033	0.07% (0.02%, 0.11%)
Global	DALYs (Disability-Adjusted Life Years)	Male	1657600 (834164, 2938052)	70.37 (35.3, 125.34)	3021199 (1515880, 5378422)	72.95 (36.6, 129.73)	0.823	1.96% (1.94%, 1.97%)	0.037	0.1% (0.06%, 0.14%)
Global	Incidence	Both	180018233 (158660995, 199950073)	3739.86 (3314.2, 4142.33)	324139599 (287693229, 358912516)	3881.86 (3445.56, 4299.95)	0.801	1.92% (1.9%, 1.93%)	0.038	0.1% (0.06%, 0.13%)
Global	Incidence	Female	94151413 (83136773, 104509680)	3879.78 (3433.47, 4308.62)	169878817 (150535063, 188377237)	4025.55 (3563.96, 4461.25)	0.804	1.92% (1.9%, 1.94%)	0.038	0.09% (0.05%, 0.13%)
Global	Incidence	Male	85866820 (75420551, 95752172)	3599.47 (3178.62, 3991.88)	154260782 (136365834, 171448988)	3737.01 (3318.13, 4153.78)	0.797	1.92% (1.91%, 1.93%)	0.038	0.11% (0.08%, 0.14%)
Global	Prevalence	Both	450765455 (397478515, 511638410)	9516.49 (8427.33, 10664.72)	825603654 (732989500, 925555128)	9838.6 (8732.46, 11056.05)	0.832	1.97% (1.94%, 1.99%)	0.034	0.08% (0.03%, 0.12%)
Global	Prevalence	Female	236915528 (209576161, 268133768)	9898.36 (8782.84, 11093.73)	434753192 (387112710, 486018857)	10229.08 (9084.3, 11502.23)	0.835	1.96% (1.94%, 1.99%)	0.033	0.06% (0.02%, 0.11%)
Global	Prevalence	Male	213849926 (187550433, 243830026)	9130.43 (8056.67, 10231.29)	390850462 (344738587, 439258614)	9442.63 (8333.56, 10619.85)	0.828	1.97% (1.95%, 1.98%)	0.034	0.09% (0.05%, 0.13%)
PC number	PC: percent change number
AAPC	AAPC：average anual percent change
UI	UI：uncertainty interval
