# Supplementary material for: Burden of Gastroesophageal reflux disease in China and Global from 1990 to 2021 with forecast to 2041: An analysis and comparison
Source: Research Square preprint supplement (doi:10.21203/rs.3.rs-7227485/v1), 2025-07-29
Supplement: Supplementary file 3 [file 5db7ecd5976b66a91312e9db.xlsx]

## Sheet: Sheet1
Age-standardized Prevalence rate per 100,000（ASPR）
	location_name	Model	Segment	Segment.Start	Segment.End	val	lower	upper	APC.Significant	Test.Statistic	P.Value	APC
1	China	5	0	1990	1994	-1.21	-1.44	-0.99	1	-11.4032	0	-1.21 (-1.44 - -0.99)
2	China	5	1	1994	2005	0.06	0	0.11	1	2.2083	0.043208	0.06 (0.00 - 0.11)
3	China	5	2	2005	2010	-1.59	-1.8	-1.37	1	-15.3582	0	-1.59 (-1.80 - -1.37)
4	China	5	3	2010	2015	0.51	0.29	0.74	1	4.8857	0.000198	0.51 (0.29 - 0.74)
5	China	5	4	2015	2018	2.85	2.12	3.6	1	8.3218	1e-06	2.85 (2.12 - 3.60)
6	China	5	5	2018	2021	0.46	0.09	0.83	1	2.6562	0.017967	0.46 (0.09 - 0.83)
7	Global	5	0	1990	1995	-0.11	-0.14	-0.08	1	-8.8572	0	-0.11 (-0.14 - -0.08)
8	Global	5	1	1995	2000	0.18	0.15	0.22	1	10.6656	0	0.18 (0.15 - 0.22)
9	Global	5	2	2000	2010	-0.17	-0.18	-0.16	1	-34.0556	0	-0.17 (-0.18 - -0.16)
10	Global	5	3	2010	2015	0.37	0.34	0.41	1	21.2662	0	0.37 (0.34 - 0.41)
11	Global	5	4	2015	2019	0.63	0.57	0.69	1	22.5824	0	0.63 (0.57 - 0.69)
12	Global	5	5	2019	2021	0.17	0.06	0.29	1	3.1261	0.006937	0.17 (0.06 - 0.29)
Age-standardized Incidence rate per 100,000（ASIR）
	location_name	Model	Segment	Segment.Start	Segment.End	val	lower	upper	APC.Significant	Test.Statistic	P.Value	APC
1	China	5	0	1990	1994	-1.07	-1.27	-0.87	1	-11.3193	0	-1.07 (-1.27 - -0.87)
2	China	5	1	1994	2005	0.03	-0.02	0.08	0	1.4079	0.179533	0.03 (-0.02 - 0.08)
3	China	5	2	2005	2010	-1.44	-1.64	-1.24	1	-15.2038	0	-1.44 (-1.64 - -1.24)
4	China	5	3	2010	2015	0.49	0.29	0.7	1	5.1157	0.000127	0.49 (0.29 - 0.70)
5	China	5	4	2015	2018	2.58	1.92	3.24	1	8.4023	0	2.58 (1.92 - 3.24)
6	China	5	5	2018	2021	0.41	0.08	0.74	1	2.6812	0.01709	0.41 (0.08 - 0.74)
7	Global	5	0	1990	1994	-0.12	-0.15	-0.1	1	-9.4272	0	-0.12 (-0.15 - -0.10)
8	Global	5	1	1994	2001	0.12	0.11	0.14	1	17.5282	0	0.12 (0.11 - 0.14)
9	Global	5	2	2001	2010	-0.12	-0.12	-0.11	1	-25.895	0	-0.12 (-0.12 - -0.11)
10	Global	5	3	2010	2015	0.36	0.33	0.38	1	27.1234	0	0.36 (0.33 - 0.38)
11	Global	5	4	2015	2019	0.58	0.54	0.62	1	27.9963	0	0.58 (0.54 - 0.62)
12	Global	5	5	2019	2021	0.18	0.09	0.27	1	4.3555	0.000565	0.18 (0.09 - 0.27)
Age-standardized DALYs rate per 100,000（ASDR）
	location_name	Model	Segment	Segment.Start	Segment.End	val	lower	upper	APC.Significant	Test.Statistic	P.Value	APC
1	China	5	0	1990	1994	-1.19	-1.41	-0.97	1	-11.365	0	-1.19 (-1.41 - -0.97)
2	China	5	1	1994	2005	0.07	0.01	0.12	1	2.6008	0.020068	0.07 (0.01 - 0.12)
3	China	5	2	2005	2010	-1.58	-1.8	-1.36	1	-15.2069	0	-1.58 (-1.80 - -1.36)
4	China	5	3	2010	2015	0.5	0.27	0.72	1	4.729	0.000269	0.50 (0.27 - 0.72)
5	China	5	4	2015	2018	2.84	2.11	3.58	1	8.3972	0	2.84 (2.11 - 3.58)
6	China	5	5	2018	2021	0.43	0.07	0.78	1	2.5802	0.020908	0.43 (0.07 - 0.78)
7	Global	5	0	1990	1995	-0.1	-0.12	-0.07	1	-7.7448	1e-06	-0.10 (-0.12 - -0.07)
8	Global	5	1	1995	2000	0.18	0.14	0.22	1	10.2059	0	0.18 (0.14 - 0.22)
9	Global	5	2	2000	2010	-0.16	-0.17	-0.15	1	-30.5603	0	-0.16 (-0.17 - -0.15)
10	Global	5	3	2010	2015	0.38	0.34	0.42	1	21.2076	0	0.38 (0.34 - 0.42)
11	Global	5	4	2015	2019	0.64	0.58	0.7	1	22.6664	0	0.64 (0.58 - 0.70)
12	Global	5	5	2019	2021	0.11	-0.01	0.23	0	1.9047	0.076177	0.11 (-0.01 - 0.23)
