# Supplementary material for: Burden of Gastroesophageal reflux disease in China and Global from 1990 to 2021 with forecast to 2041: An analysis and comparison
Source: Research Square preprint supplement (doi:10.21203/rs.3.rs-7227485/v1), 2025-07-29
Supplement: Supplementary file 4 [file 81e66675900d26815f67b70e.xlsx]

## Sheet: Table S1
measure_id	measure_name	location_id	location_name	sex_id	sex_name	age_id	age_name	cause_id	cause_name	metric_id	metric_name	year	val	upper	lower
2	DALYs (Disability-Adjusted Life Years)	1	Global	1	Male	22	All ages	536	Gastroesophageal reflux disease	1	Number	1990	1657600.22240704	2938052.49943591	834164.256932921
2	DALYs (Disability-Adjusted Life Years)	1	Global	2	Female	22	All ages	536	Gastroesophageal reflux disease	1	Number	1990	1815102.35523003	3195138.26309252	918528.580315357
2	DALYs (Disability-Adjusted Life Years)	1	Global	3	Both	22	All ages	536	Gastroesophageal reflux disease	1	Number	1990	3472702.57763707	6128627.18590433	1752692.83724828
2	DALYs (Disability-Adjusted Life Years)	1	Global	1	Male	22	All ages	536	Gastroesophageal reflux disease	3	Rate	1990	61.7184971162216	109.394401775855	31.0589752523135
2	DALYs (Disability-Adjusted Life Years)	1	Global	2	Female	22	All ages	536	Gastroesophageal reflux disease	3	Rate	1990	68.5492571630296	120.667770518323	34.6892017864471
2	DALYs (Disability-Adjusted Life Years)	1	Global	3	Both	22	All ages	536	Gastroesophageal reflux disease	3	Rate	1990	65.1096318675753	114.905509759882	32.8612033017294
2	DALYs (Disability-Adjusted Life Years)	1	Global	1	Male	27	Age-standardized	536	Gastroesophageal reflux disease	3	Rate	1990	70.3709800765021	125.34429840642	35.2975509767704
2	DALYs (Disability-Adjusted Life Years)	1	Global	2	Female	27	Age-standardized	536	Gastroesophageal reflux disease	3	Rate	1990	75.6217665051667	133.943288632248	38.1812314845377
2	DALYs (Disability-Adjusted Life Years)	1	Global	3	Both	27	Age-standardized	536	Gastroesophageal reflux disease	3	Rate	1990	73.0111808861787	129.662542066787	36.7466921642921
2	DALYs (Disability-Adjusted Life Years)	6	China	1	Male	22	All ages	536	Gastroesophageal reflux disease	1	Number	1991	189631.692669415	334526.765212058	96076.7492483459
2	DALYs (Disability-Adjusted Life Years)	6	China	2	Female	22	All ages	536	Gastroesophageal reflux disease	1	Number	1991	207317.840098259	361982.716575772	103912.309742561
2	DALYs (Disability-Adjusted Life Years)	6	China	3	Both	22	All ages	536	Gastroesophageal reflux disease	1	Number	1991	396949.532767674	697589.720410937	200801.386690555
2	DALYs (Disability-Adjusted Life Years)	6	China	1	Male	22	All ages	536	Gastroesophageal reflux disease	3	Rate	1991	30.7925536979385	54.3207374051527	15.6010233242526
2	DALYs (Disability-Adjusted Life Years)	6	China	2	Female	22	All ages	536	Gastroesophageal reflux disease	3	Rate	1991	35.9319162924507	62.7381255040568	18.0098751446343
2	DALYs (Disability-Adjusted Life Years)	6	China	3	Both	22	All ages	536	Gastroesophageal reflux disease	3	Rate	1991	33.278513979248	58.4828733784205	16.8343106677621
2	DALYs (Disability-Adjusted Life Years)	6	China	1	Male	27	Age-standardized	536	Gastroesophageal reflux disease	3	Rate	1991	32.3295756194508	57.5362114388271	16.1532780439593
2	DALYs (Disability-Adjusted Life Years)	6	China	2	Female	27	Age-standardized	536	Gastroesophageal reflux disease	3	Rate	1991	37.1940874508841	65.4464808546979	18.7223654865061
2	DALYs (Disability-Adjusted Life Years)	6	China	3	Both	27	Age-standardized	536	Gastroesophageal reflux disease	3	Rate	1991	34.7206164260271	61.5861168784226	17.341464331302
2	DALYs (Disability-Adjusted Life Years)	6	China	1	Male	22	All ages	536	Gastroesophageal reflux disease	1	Number	1990	188599.565609807	333433.518942882	96082.0620162163
2	DALYs (Disability-Adjusted Life Years)	6	China	2	Female	22	All ages	536	Gastroesophageal reflux disease	1	Number	1990	205257.982844277	358791.942219228	103585.685365196
2	DALYs (Disability-Adjusted Life Years)	6	China	3	Both	22	All ages	536	Gastroesophageal reflux disease	1	Number	1990	393857.548454084	694580.360789011	199884.13809056
2	DALYs (Disability-Adjusted Life Years)	6	China	1	Male	22	All ages	536	Gastroesophageal reflux disease	3	Rate	1990	31.0790064579861	54.9459509889562	15.8332020343918
2	DALYs (Disability-Adjusted Life Years)	6	China	2	Female	22	All ages	536	Gastroesophageal reflux disease	3	Rate	1990	36.0342960552418	62.9881229904297	18.1851015088968
2	DALYs (Disability-Adjusted Life Years)	6	China	3	Both	22	All ages	536	Gastroesophageal reflux disease	3	Rate	1990	33.478263658533	59.0399867713703	16.990340549318
2	DALYs (Disability-Adjusted Life Years)	6	China	1	Male	27	Age-standardized	536	Gastroesophageal reflux disease	3	Rate	1990	32.9187736378702	58.9346344997259	16.5464064325031
2	DALYs (Disability-Adjusted Life Years)	6	China	2	Female	27	Age-standardized	536	Gastroesophageal reflux disease	3	Rate	1990	37.6900043979796	66.5408937692228	18.9759451603355
2	DALYs (Disability-Adjusted Life Years)	6	China	3	Both	27	Age-standardized	536	Gastroesophageal reflux disease	3	Rate	1990	35.2685377220852	62.785116965307	17.6855457958475
2	DALYs (Disability-Adjusted Life Years)	1	Global	1	Male	22	All ages	536	Gastroesophageal reflux disease	1	Number	1992	1723172.40614626	3053384.71928971	865954.832592067
2	DALYs (Disability-Adjusted Life Years)	1	Global	2	Female	22	All ages	536	Gastroesophageal reflux disease	1	Number	1992	1886828.20504419	3321080.13199299	953650.066325894
2	DALYs (Disability-Adjusted Life Years)	1	Global	3	Both	22	All ages	536	Gastroesophageal reflux disease	1	Number	1992	3610000.61119045	6371566.4608324	1819604.89891796
2	DALYs (Disability-Adjusted Life Years)	1	Global	1	Male	22	All ages	536	Gastroesophageal reflux disease	3	Rate	1992	62.2052117652635	110.224863389621	31.2603100818054
2	DALYs (Disability-Adjusted Life Years)	1	Global	2	Female	22	All ages	536	Gastroesophageal reflux disease	3	Rate	1992	69.1889422121928	121.78216369685	34.9698182130635
2	DALYs (Disability-Adjusted Life Years)	1	Global	3	Both	22	All ages	536	Gastroesophageal reflux disease	3	Rate	1992	65.6697151850139	115.905508012441	33.1005305347563
2	DALYs (Disability-Adjusted Life Years)	1	Global	1	Male	27	Age-standardized	536	Gastroesophageal reflux disease	3	Rate	1992	70.0760131739006	124.866472178247	35.121867789464
2	DALYs (Disability-Adjusted Life Years)	1	Global	2	Female	27	Age-standardized	536	Gastroesophageal reflux disease	3	Rate	1992	75.4284770577483	133.626039004594	38.0559609142077
2	DALYs (Disability-Adjusted Life Years)	1	Global	3	Both	27	Age-standardized	536	Gastroesophageal reflux disease	3	Rate	1992	72.7631754449309	129.278574827058	36.5943222658066
2	DALYs (Disability-Adjusted Life Years)	1	Global	1	Male	22	All ages	536	Gastroesophageal reflux disease	1	Number	1991	1690173.40391832	2993848.23976627	849796.688973997
2	DALYs (Disability-Adjusted Life Years)	1	Global	2	Female	22	All ages	536	Gastroesophageal reflux disease	1	Number	1991	1850758.08161181	3256589.30077165	936103.389751444
2	DALYs (Disability-Adjusted Life Years)	1	Global	3	Both	22	All ages	536	Gastroesophageal reflux disease	1	Number	1991	3540931.48553012	6246967.7668083	1785900.07872544
2	DALYs (Disability-Adjusted Life Years)	1	Global	1	Male	22	All ages	536	Gastroesophageal reflux disease	3	Rate	1991	61.9435540134891	109.72223306687	31.1443944046873
2	DALYs (Disability-Adjusted Life Years)	1	Global	2	Female	22	All ages	536	Gastroesophageal reflux disease	3	Rate	1991	68.854050628252	121.155415620542	34.8260049930954
2	DALYs (Disability-Adjusted Life Years)	1	Global	3	Both	22	All ages	536	Gastroesophageal reflux disease	3	Rate	1991	65.3728861893108	115.331887814461	32.9713927166034
2	DALYs (Disability-Adjusted Life Years)	1	Global	1	Male	27	Age-standardized	536	Gastroesophageal reflux disease	3	Rate	1991	70.2068970685685	125.066111007818	35.1876778155339
2	DALYs (Disability-Adjusted Life Years)	1	Global	2	Female	27	Age-standardized	536	Gastroesophageal reflux disease	3	Rate	1991	75.5172114741292	133.695709932507	38.1200033713656
2	DALYs (Disability-Adjusted Life Years)	1	Global	3	Both	27	Age-standardized	536	Gastroesophageal reflux disease	3	Rate	1991	72.8748193628326	129.395751641533	36.6604738816568
2	DALYs (Disability-Adjusted Life Years)	1	Global	1	Male	22	All ages	536	Gastroesophageal reflux disease	1	Number	1993	1756719.49732827	3111441.4474828	883354.460865002
2	DALYs (Disability-Adjusted Life Years)	1	Global	2	Female	22	All ages	536	Gastroesophageal reflux disease	1	Number	1993	1923699.35635386	3384968.82885737	971106.063026692
2	DALYs (Disability-Adjusted Life Years)	1	Global	3	Both	22	All ages	536	Gastroesophageal reflux disease	1	Number	1993	3680418.85368213	6494448.09403398	1854460.52389169
2	DALYs (Disability-Adjusted Life Years)	1	Global	1	Male	22	All ages	536	Gastroesophageal reflux disease	3	Rate	1993	62.5120539020331	110.71921030869	31.4337614833654
2	DALYs (Disability-Adjusted Life Years)	1	Global	2	Female	22	All ages	536	Gastroesophageal reflux disease	3	Rate	1993	69.5666969013675	122.410552231001	35.118086889473
2	DALYs (Disability-Adjusted Life Years)	1	Global	3	Both	22	All ages	536	Gastroesophageal reflux disease	3	Rate	1993	66.0109376462505	116.482559519872	33.261072415053
2	DALYs (Disability-Adjusted Life Years)	1	Global	1	Male	27	Age-standardized	536	Gastroesophageal reflux disease	3	Rate	1993	69.9909010106168	124.61485390567	35.1108389179854
2	DALYs (Disability-Adjusted Life Years)	1	Global	2	Female	27	Age-standardized	536	Gastroesophageal reflux disease	3	Rate	1993	75.3740362504481	133.547066070267	37.9989979570378
2	DALYs (Disability-Adjusted Life Years)	1	Global	3	Both	27	Age-standardized	536	Gastroesophageal reflux disease	3	Rate	1993	72.6919896614673	129.117495632963	36.5596629494871
2	DALYs (Disability-Adjusted Life Years)	1	Global	1	Male	22	All ages	536	Gastroesophageal reflux disease	1	Number	1994	1790427.48183901	3170470.69530499	900046.857716303
2	DALYs (Disability-Adjusted Life Years)	1	Global	2	Female	22	All ages	536	Gastroesophageal reflux disease	1	Number	1994	1960812.71346571	3451652.58739473	988511.044150553
2	DALYs (Disability-Adjusted Life Years)	1	Global	3	Both	22	All ages	536	Gastroesophageal reflux disease	1	Number	1994	3751240.19530472	6618291.64536582	1888557.90186686
2	DALYs (Disability-Adjusted Life Years)	1	Global	1	Male	22	All ages	536	Gastroesophageal reflux disease	3	Rate	1994	62.860444805906	111.312633531662	31.5999091815169
2	DALYs (Disability-Adjusted Life Years)	1	Global	2	Female	22	All ages	536	Gastroesophageal reflux disease	3	Rate	1994	69.9740113508639	123.176464366505	35.276231405899
2	DALYs (Disability-Adjusted Life Years)	1	Global	3	Both	22	All ages	536	Gastroesophageal reflux disease	3	Rate	1994	66.3882370773012	117.128387392846	33.4230876178705
2	DALYs (Disability-Adjusted Life Years)	1	Global	1	Male	27	Age-standardized	536	Gastroesophageal reflux disease	3	Rate	1994	69.943611032893	124.660825064599	35.0906508077892
2	DALYs (Disability-Adjusted Life Years)	1	Global	2	Female	27	Age-standardized	536	Gastroesophageal reflux disease	3	Rate	1994	75.3367491961804	133.392891402822	37.9459166335114
2	DALYs (Disability-Adjusted Life Years)	1	Global	3	Both	27	Age-standardized	536	Gastroesophageal reflux disease	3	Rate	1994	72.6487749116031	129.031295957693	36.5234661788648
2	DALYs (Disability-Adjusted Life Years)	1	Global	1	Male	22	All ages	536	Gastroesophageal reflux disease	1	Number	1995	1824946.90639475	3232031.05714676	917078.072043764
2	DALYs (Disability-Adjusted Life Years)	1	Global	2	Female	22	All ages	536	Gastroesophageal reflux disease	1	Number	1995	1999034.29918924	3522574.83870356	1006483.34277949
2	DALYs (Disability-Adjusted Life Years)	1	Global	3	Both	22	All ages	536	Gastroesophageal reflux disease	1	Number	1995	3.82398e+06	6749098.38786268	1923561.41482326
2	DALYs (Disability-Adjusted Life Years)	1	Global	1	Male	22	All ages	536	Gastroesophageal reflux disease	3	Rate	1995	63.2472242048543	112.012569895661	31.7831944768703
2	DALYs (Disability-Adjusted Life Years)	1	Global	2	Female	22	All ages	536	Gastroesophageal reflux disease	3	Rate	1995	70.4221792612995	124.09361702955	35.4564953775312
2	DALYs (Disability-Adjusted Life Years)	1	Global	3	Both	22	All ages	536	Gastroesophageal reflux disease	3	Rate	1995	66.8053860573982	117.907515518679	33.604836429304
2	DALYs (Disability-Adjusted Life Years)	1	Global	1	Male	27	Age-standardized	536	Gastroesophageal reflux disease	3	Rate	1995	69.9503899635356	124.463502521765	35.096716309646
2	DALYs (Disability-Adjusted Life Years)	1	Global	2	Female	27	Age-standardized	536	Gastroesophageal reflux disease	3	Rate	1995	75.3501770334445	133.500379201725	37.9170881481687
2	DALYs (Disability-Adjusted Life Years)	1	Global	3	Both	27	Age-standardized	536	Gastroesophageal reflux disease	3	Rate	1995	72.6585740637614	129.062917666098	36.5110778336137
2	DALYs (Disability-Adjusted Life Years)	1	Global	1	Male	22	All ages	536	Gastroesophageal reflux disease	1	Number	1996	1861679.94545898	3297521.38741211	935007.463601838
2	DALYs (Disability-Adjusted Life Years)	1	Global	2	Female	22	All ages	536	Gastroesophageal reflux disease	1	Number	1996	2039761.5901555	3594361.07131027	1028899.01023769
2	DALYs (Disability-Adjusted Life Years)	1	Global	3	Both	22	All ages	536	Gastroesophageal reflux disease	1	Number	1996	3901441.53561448	6890407.14839137	1963906.47383953
2	DALYs (Disability-Adjusted Life Years)	1	Global	1	Male	22	All ages	536	Gastroesophageal reflux disease	3	Rate	1996	63.6954076307387	112.821201869106	31.990290101782
2	DALYs (Disability-Adjusted Life Years)	1	Global	2	Female	22	All ages	536	Gastroesophageal reflux disease	3	Rate	1996	70.9332009497596	124.994772618406	35.780211080764
2	DALYs (Disability-Adjusted Life Years)	1	Global	3	Both	22	All ages	536	Gastroesophageal reflux disease	3	Rate	1996	67.2848607294003	118.833021363053	33.8698330787746
2	DALYs (Disability-Adjusted Life Years)	1	Global	1	Male	27	Age-standardized	536	Gastroesophageal reflux disease	3	Rate	1996	70.0237184001358	124.610538096631	35.1277899395503
2	DALYs (Disability-Adjusted Life Years)	1	Global	2	Female	27	Age-standardized	536	Gastroesophageal reflux disease	3	Rate	1996	75.4262108743396	133.450409653015	38.0388069087568
2	DALYs (Disability-Adjusted Life Years)	1	Global	3	Both	27	Age-standardized	536	Gastroesophageal reflux disease	3	Rate	1996	72.7335653313468	129.091186638879	36.5871761731186
2	DALYs (Disability-Adjusted Life Years)	1	Global	1	Male	22	All ages	536	Gastroesophageal reflux disease	1	Number	1997	1900130.32954748	3368720.73151285	953529
2	DALYs (Disability-Adjusted Life Years)	1	Global	2	Female	22	All ages	536	Gastroesophageal reflux disease	1	Number	1997	2083324.89664171	3671343.49402024	1051925.86794415
2	DALYs (Disability-Adjusted Life Years)	1	Global	3	Both	22	All ages	536	Gastroesophageal reflux disease	1	Number	1997	3983455.2261892	7036027.40097522	2005454.90233925
2	DALYs (Disability-Adjusted Life Years)	1	Global	1	Male	22	All ages	536	Gastroesophageal reflux disease	3	Rate	1997	64.1914960105686	113.804416483961	32.2127668063228
2	DALYs (Disability-Adjusted Life Years)	1	Global	2	Female	22	All ages	536	Gastroesophageal reflux disease	3	Rate	1997	71.5186889671696	126.033953640036	36.1116785419744
2	DALYs (Disability-Adjusted Life Years)	1	Global	3	Both	22	All ages	536	Gastroesophageal reflux disease	3	Rate	1997	67.8257011628544	119.801394712484	34.1465830988565
2	DALYs (Disability-Adjusted Life Years)	1	Global	1	Male	27	Age-standardized	536	Gastroesophageal reflux disease	3	Rate	1997	70.1334934561905	124.840140566127	35.1641335386442
2	DALYs (Disability-Adjusted Life Years)	1	Global	2	Female	27	Age-standardized	536	Gastroesophageal reflux disease	3	Rate	1997	75.5663633868384	133.615581458291	38.1531350538077
2	DALYs (Disability-Adjusted Life Years)	1	Global	3	Both	27	Age-standardized	536	Gastroesophageal reflux disease	3	Rate	1997	72.8593397440604	129.260372661487	36.6629014548317
2	DALYs (Disability-Adjusted Life Years)	6	China	1	Male	22	All ages	536	Gastroesophageal reflux disease	1	Number	1992	190747.155715647	337493.195423974	96829.844101761
2	DALYs (Disability-Adjusted Life Years)	6	China	2	Female	22	All ages	536	Gastroesophageal reflux disease	1	Number	1992	209191.482926726	367231.704595536	104838.309315974
2	DALYs (Disability-Adjusted Life Years)	6	China	3	Both	22	All ages	536	Gastroesophageal reflux disease	1	Number	1992	399938.638642373	704994.068064062	201927.247925741
2	DALYs (Disability-Adjusted Life Years)	6	China	1	Male	22	All ages	536	Gastroesophageal reflux disease	3	Rate	1992	30.6064472452735	54.1526694992041	15.5368896807382
2	DALYs (Disability-Adjusted Life Years)	6	China	2	Female	22	All ages	536	Gastroesophageal reflux disease	3	Rate	1992	35.8810253215895	62.9884635221901	17.9821184811655
2	DALYs (Disability-Adjusted Life Years)	6	China	3	Both	22	All ages	536	Gastroesophageal reflux disease	3	Rate	1992	33.1558196705967	58.4456062282948	16.7402265545853
2	DALYs (Disability-Adjusted Life Years)	6	China	1	Male	27	Age-standardized	536	Gastroesophageal reflux disease	3	Rate	1992	31.8303704053338	56.8514191582066	15.9846058774559
2	DALYs (Disability-Adjusted Life Years)	6	China	2	Female	27	Age-standardized	536	Gastroesophageal reflux disease	3	Rate	1992	36.7384610694216	65.152832535085	18.5068147630984
2	DALYs (Disability-Adjusted Life Years)	6	China	3	Both	27	Age-standardized	536	Gastroesophageal reflux disease	3	Rate	1992	34.2398086174471	61.1078536031803	17.1119297640768
2	DALYs (Disability-Adjusted Life Years)	1	Global	1	Male	22	All ages	536	Gastroesophageal reflux disease	1	Number	1998	1939870.55670255	3437964.01846569	974213.586489862
2	DALYs (Disability-Adjusted Life Years)	1	Global	2	Female	22	All ages	536	Gastroesophageal reflux disease	1	Number	1998	2128572.15988375	3753348.21179126	1075475.20785034
2	DALYs (Disability-Adjusted Life Years)	1	Global	3	Both	22	All ages	536	Gastroesophageal reflux disease	1	Number	1998	4068442.7165863	7191312.23025695	2049688.79434021
2	DALYs (Disability-Adjusted Life Years)	1	Global	1	Male	22	All ages	536	Gastroesophageal reflux disease	3	Rate	1998	64.7194789017332	114.700044798982	32.5024757135278
2	DALYs (Disability-Adjusted Life Years)	1	Global	2	Female	22	All ages	536	Gastroesophageal reflux disease	3	Rate	1998	72.1420217799102	127.209278381909	36.4502352002623
2	DALYs (Disability-Adjusted Life Years)	1	Global	3	Both	22	All ages	536	Gastroesophageal reflux disease	3	Rate	1998	68.4015352221859	120.905425264139	34.4608170809445
2	DALYs (Disability-Adjusted Life Years)	1	Global	1	Male	27	Age-standardized	536	Gastroesophageal reflux disease	3	Rate	1998	70.2624644216733	124.963862137274	35.2595897253733
2	DALYs (Disability-Adjusted Life Years)	1	Global	2	Female	27	Age-standardized	536	Gastroesophageal reflux disease	3	Rate	1998	75.7323746625554	134.012137911643	38.2624075655707
2	DALYs (Disability-Adjusted Life Years)	1	Global	3	Both	27	Age-standardized	536	Gastroesophageal reflux disease	3	Rate	1998	73.0076918598104	129.576617051483	36.7652225646908
2	DALYs (Disability-Adjusted Life Years)	6	China	1	Male	22	All ages	536	Gastroesophageal reflux disease	1	Number	1993	192197.434093328	340624.975947198	96974.7117013684
2	DALYs (Disability-Adjusted Life Years)	6	China	2	Female	22	All ages	536	Gastroesophageal reflux disease	1	Number	1993	211325.130870449	372445.395589544	105742.095413474
2	DALYs (Disability-Adjusted Life Years)	6	China	3	Both	22	All ages	536	Gastroesophageal reflux disease	1	Number	1993	403522.564963777	714902.185893019	202718.871966994
2	DALYs (Disability-Adjusted Life Years)	6	China	1	Male	22	All ages	536	Gastroesophageal reflux disease	3	Rate	1993	30.5455575705089	54.1348528497839	15.411998880897
2	DALYs (Disability-Adjusted Life Years)	6	China	2	Female	22	All ages	536	Gastroesophageal reflux disease	3	Rate	1993	35.937782482779	63.3377656423412	17.9824160457865
2	DALYs (Disability-Adjusted Life Years)	6	China	3	Both	22	All ages	536	Gastroesophageal reflux disease	3	Rate	1993	33.1504479069195	58.7311088144892	16.6538924669419
2	DALYs (Disability-Adjusted Life Years)	6	China	1	Male	27	Age-standardized	536	Gastroesophageal reflux disease	3	Rate	1993	31.4450248258116	56.0762391474914	15.7813227675033
2	DALYs (Disability-Adjusted Life Years)	6	China	2	Female	27	Age-standardized	536	Gastroesophageal reflux disease	3	Rate	1993	36.3784730239282	64.7346441578491	18.2720837661753
2	DALYs (Disability-Adjusted Life Years)	6	China	3	Both	27	Age-standardized	536	Gastroesophageal reflux disease	3	Rate	1993	33.8647391836059	60.6216506540089	16.9452202896057
2	DALYs (Disability-Adjusted Life Years)	6	China	1	Male	22	All ages	536	Gastroesophageal reflux disease	1	Number	1998	209365.337425007	372515.637313557	104866.549746105
2	DALYs (Disability-Adjusted Life Years)	6	China	2	Female	22	All ages	536	Gastroesophageal reflux disease	1	Number	1998	227489.242242141	406627.520917743	114499.950960502
2	DALYs (Disability-Adjusted Life Years)	6	China	3	Both	22	All ages	536	Gastroesophageal reflux disease	1	Number	1998	436854.579667148	779348.221806864	219043.692289458
2	DALYs (Disability-Adjusted Life Years)	6	China	1	Male	22	All ages	536	Gastroesophageal reflux disease	3	Rate	1998	32.4645100352598	57.7628455340126	16.2607678924642
2	DALYs (Disability-Adjusted Life Years)	6	China	2	Female	22	All ages	536	Gastroesophageal reflux disease	3	Rate	1998	37.6200874643111	67.2443353872481	18.9349532634536
2	DALYs (Disability-Adjusted Life Years)	6	China	3	Both	22	All ages	536	Gastroesophageal reflux disease	3	Rate	1998	34.9593632429406	62.3674761510915	17.5290093345402
2	DALYs (Disability-Adjusted Life Years)	6	China	1	Male	27	Age-standardized	536	Gastroesophageal reflux disease	3	Rate	1998	31.5394018257814	56.2664149804144	15.8018490908122
2	DALYs (Disability-Adjusted Life Years)	6	China	2	Female	27	Age-standardized	536	Gastroesophageal reflux disease	3	Rate	1998	35.8923813125807	64.3457493547745	18.1481804572625
2	DALYs (Disability-Adjusted Life Years)	6	China	3	Both	27	Age-standardized	536	Gastroesophageal reflux disease	3	Rate	1998	33.6815031264215	60.2493454087254	16.8637438569976
2	DALYs (Disability-Adjusted Life Years)	6	China	1	Male	22	All ages	536	Gastroesophageal reflux disease	1	Number	1995	196644.517693424	349219.584349983	98732.3404114146
2	DALYs (Disability-Adjusted Life Years)	6	China	2	Female	22	All ages	536	Gastroesophageal reflux disease	1	Number	1995	216634.267290374	380726.194362264	108101.805785375
2	DALYs (Disability-Adjusted Life Years)	6	China	3	Both	22	All ages	536	Gastroesophageal reflux disease	1	Number	1995	413278.784983798	735776.258714128	206323.044362508
2	DALYs (Disability-Adjusted Life Years)	6	China	1	Male	22	All ages	536	Gastroesophageal reflux disease	3	Rate	1995	30.8304028315114	54.7514906006607	15.4794949947573
2	DALYs (Disability-Adjusted Life Years)	6	China	2	Female	22	All ages	536	Gastroesophageal reflux disease	3	Rate	1995	36.3528999075232	63.8887901205027	18.140316279099
2	DALYs (Disability-Adjusted Life Years)	6	China	3	Both	22	All ages	536	Gastroesophageal reflux disease	3	Rate	1995	33.4978605670397	59.6375410944702	16.723289031382
2	DALYs (Disability-Adjusted Life Years)	6	China	1	Male	27	Age-standardized	536	Gastroesophageal reflux disease	3	Rate	1995	31.0628512721307	55.3299	15.6114958712714
2	DALYs (Disability-Adjusted Life Years)	6	China	2	Female	27	Age-standardized	536	Gastroesophageal reflux disease	3	Rate	1995	35.9477380516837	63.6701441074452	17.9911898653847
2	DALYs (Disability-Adjusted Life Years)	6	China	3	Both	27	Age-standardized	536	Gastroesophageal reflux disease	3	Rate	1995	33.4574995130258	59.7897764548512	16.7336777853036
2	DALYs (Disability-Adjusted Life Years)	6	China	1	Male	22	All ages	536	Gastroesophageal reflux disease	1	Number	1996	200280.795848229	355653.998547704	100368.407888183
2	DALYs (Disability-Adjusted Life Years)	6	China	2	Female	22	All ages	536	Gastroesophageal reflux disease	1	Number	1996	220024.571818272	389832.034264481	109883.770199758
2	DALYs (Disability-Adjusted Life Years)	6	China	3	Both	22	All ages	536	Gastroesophageal reflux disease	1	Number	1996	420305.367666502	747979.414664589	209735.336047811
2	DALYs (Disability-Adjusted Life Years)	6	China	1	Male	22	All ages	536	Gastroesophageal reflux disease	3	Rate	1996	31.2575241054608	55.5063873484536	15.6643472266257
2	DALYs (Disability-Adjusted Life Years)	6	China	2	Female	22	All ages	536	Gastroesophageal reflux disease	3	Rate	1996	36.7253827101542	65.0687808762825	18.341240166366
2	DALYs (Disability-Adjusted Life Years)	6	China	3	Both	22	All ages	536	Gastroesophageal reflux disease	3	Rate	1996	33.8996427439646	60.3281254240101	16.9161602724229
2	DALYs (Disability-Adjusted Life Years)	6	China	1	Male	27	Age-standardized	536	Gastroesophageal reflux disease	3	Rate	1996	31.1314149267334	55.4810092057418	15.569668764279
2	DALYs (Disability-Adjusted Life Years)	6	China	2	Female	27	Age-standardized	536	Gastroesophageal reflux disease	3	Rate	1996	35.8920798900756	64.0598687730502	18.0293331040512
2	DALYs (Disability-Adjusted Life Years)	6	China	3	Both	27	Age-standardized	536	Gastroesophageal reflux disease	3	Rate	1996	33.4671002202467	59.8122606191435	16.7726414631971
2	DALYs (Disability-Adjusted Life Years)	6	China	1	Male	22	All ages	536	Gastroesophageal reflux disease	1	Number	1994	194113.39672532	344467.409761291	97636.5942927679
2	DALYs (Disability-Adjusted Life Years)	6	China	2	Female	22	All ages	536	Gastroesophageal reflux disease	1	Number	1994	213695.844205284	375872.774898567	106850.667468452
2	DALYs (Disability-Adjusted Life Years)	6	China	3	Both	22	All ages	536	Gastroesophageal reflux disease	1	Number	1994	407809.240930604	722964.014083766	204489.730372969
2	DALYs (Disability-Adjusted Life Years)	6	China	1	Male	22	All ages	536	Gastroesophageal reflux disease	3	Rate	1994	30.6156130934347	54.3294853341448	15.3992678766932
2	DALYs (Disability-Adjusted Life Years)	6	China	2	Female	22	All ages	536	Gastroesophageal reflux disease	3	Rate	1994	36.0805613335741	63.4626319420634	18.0407441963418
2	DALYs (Disability-Adjusted Life Years)	6	China	3	Both	22	All ages	536	Gastroesophageal reflux disease	3	Rate	1994	33.2550374658429	58.9545134385589	16.6752318545189
2	DALYs (Disability-Adjusted Life Years)	6	China	1	Male	27	Age-standardized	536	Gastroesophageal reflux disease	3	Rate	1994	31.1820999451143	55.6874622921902	15.6529516130799
2	DALYs (Disability-Adjusted Life Years)	6	China	2	Female	27	Age-standardized	536	Gastroesophageal reflux disease	3	Rate	1994	36.0971282379792	64.1256011616762	18.0988068809946
2	DALYs (Disability-Adjusted Life Years)	6	China	3	Both	27	Age-standardized	536	Gastroesophageal reflux disease	3	Rate	1994	33.5916605804881	60.0842362780367	16.821419019731
2	DALYs (Disability-Adjusted Life Years)	6	China	1	Male	22	All ages	536	Gastroesophageal reflux disease	1	Number	1997	204630.999564169	364381.19894849	102799.868234214
2	DALYs (Disability-Adjusted Life Years)	6	China	2	Female	22	All ages	536	Gastroesophageal reflux disease	1	Number	1997	223697.201215237	398505.584182387	111989.819763239
2	DALYs (Disability-Adjusted Life Years)	6	China	3	Both	22	All ages	536	Gastroesophageal reflux disease	1	Number	1997	428328.200779406	764533.082771914	214252.702775491
2	DALYs (Disability-Adjusted Life Years)	6	China	1	Male	22	All ages	536	Gastroesophageal reflux disease	3	Rate	1997	31.8237253853194	56.6676956844647	15.987190520011
2	DALYs (Disability-Adjusted Life Years)	6	China	2	Female	22	All ages	536	Gastroesophageal reflux disease	3	Rate	1997	37.160411676189	66.1994494478682	18.6036650585537
2	DALYs (Disability-Adjusted Life Years)	6	China	3	Both	22	All ages	536	Gastroesophageal reflux disease	3	Rate	1997	34.4041159280228	61.4087159393922	17.2091746720558
2	DALYs (Disability-Adjusted Life Years)	6	China	1	Male	27	Age-standardized	536	Gastroesophageal reflux disease	3	Rate	1997	31.3087976547856	55.9008320810581	15.6517172149072
2	DALYs (Disability-Adjusted Life Years)	6	China	2	Female	27	Age-standardized	536	Gastroesophageal reflux disease	3	Rate	1997	35.8859486314527	64.3782769603426	18.0724994816809
2	DALYs (Disability-Adjusted Life Years)	6	China	3	Both	27	Age-standardized	536	Gastroesophageal reflux disease	3	Rate	1997	33.5576127257801	60.104531543944	16.8029320586383
2	DALYs (Disability-Adjusted Life Years)	1	Global	1	Male	22	All ages	536	Gastroesophageal reflux disease	1	Number	1999	1979801.10928636	3507588.03583203	993263.259099409
2	DALYs (Disability-Adjusted Life Years)	1	Global	2	Female	22	All ages	536	Gastroesophageal reflux disease	1	Number	1999	2174229.93634661	3834838.45566746	1100450.25541077
2	DALYs (Disability-Adjusted Life Years)	1	Global	3	Both	22	All ages	536	Gastroesophageal reflux disease	1	Number	1999	4154031.04563297	7342426.49149949	2093713.51451018
2	DALYs (Disability-Adjusted Life Years)	1	Global	1	Male	22	All ages	536	Gastroesophageal reflux disease	3	Rate	1999	65.2410636496003	115.586749208753	32.7313441758159
2	DALYs (Disability-Adjusted Life Years)	1	Global	2	Female	22	All ages	536	Gastroesophageal reflux disease	3	Rate	1999	72.7583216601338	128.328841953551	36.8254122140783
2	DALYs (Disability-Adjusted Life Years)	1	Global	3	Both	22	All ages	536	Gastroesophageal reflux disease	3	Rate	1999	68.9707967987922	121.908815796564	34.7626408608515
2	DALYs (Disability-Adjusted Life Years)	1	Global	1	Male	27	Age-standardized	536	Gastroesophageal reflux disease	3	Rate	1999	70.3697813137693	125.167449697841	35.2826119139728
2	DALYs (Disability-Adjusted Life Years)	1	Global	2	Female	27	Age-standardized	536	Gastroesophageal reflux disease	3	Rate	1999	75.8748512920889	134.254007955143	38.3507466018769
2	DALYs (Disability-Adjusted Life Years)	1	Global	3	Both	27	Age-standardized	536	Gastroesophageal reflux disease	3	Rate	1999	73.1333723868491	129.765888135899	36.8470659092512
2	DALYs (Disability-Adjusted Life Years)	1	Global	1	Male	22	All ages	536	Gastroesophageal reflux disease	1	Number	2000	2019593.43160789	3577273.22623078	1013422.60604647
2	DALYs (Disability-Adjusted Life Years)	1	Global	2	Female	22	All ages	536	Gastroesophageal reflux disease	1	Number	2000	2219380.19802765	3913188.95937005	1124122.60750958
2	DALYs (Disability-Adjusted Life Years)	1	Global	3	Both	22	All ages	536	Gastroesophageal reflux disease	1	Number	2000	4238973.62963554	7490462.18560083	2137545.21355605
2	DALYs (Disability-Adjusted Life Years)	1	Global	1	Male	22	All ages	536	Gastroesophageal reflux disease	3	Rate	2000	65.7379284212386	116.440530855732	32.9869872292605
2	DALYs (Disability-Adjusted Life Years)	1	Global	2	Female	22	All ages	536	Gastroesophageal reflux disease	3	Rate	2000	73.3294210282304	129.293701466599	37.141567743408
2	DALYs (Disability-Adjusted Life Years)	1	Global	3	Both	22	All ages	536	Gastroesophageal reflux disease	3	Rate	2000	69.5052942621709	122.819065145874	35.0487457690748
2	DALYs (Disability-Adjusted Life Years)	1	Global	1	Male	27	Age-standardized	536	Gastroesophageal reflux disease	3	Rate	2000	70.4582013547014	125.34465001073	35.3374949003526
2	DALYs (Disability-Adjusted Life Years)	1	Global	2	Female	27	Age-standardized	536	Gastroesophageal reflux disease	3	Rate	2000	75.9774662448165	134.371301900071	38.4164087376947
2	DALYs (Disability-Adjusted Life Years)	1	Global	3	Both	27	Age-standardized	536	Gastroesophageal reflux disease	3	Rate	2000	73.2294	129.86641760771	36.9156153808859
2	DALYs (Disability-Adjusted Life Years)	1	Global	1	Male	22	All ages	536	Gastroesophageal reflux disease	1	Number	2001	2058284.3381628	3655361.11191929	1033724.60479871
2	DALYs (Disability-Adjusted Life Years)	1	Global	2	Female	22	All ages	536	Gastroesophageal reflux disease	1	Number	2001	2260959.45860175	3990347.20939809	1145435.49921877
2	DALYs (Disability-Adjusted Life Years)	1	Global	3	Both	22	All ages	536	Gastroesophageal reflux disease	1	Number	2001	4319243.79676454	7643186.59123134	2179160.10401748
2	DALYs (Disability-Adjusted Life Years)	1	Global	1	Male	22	All ages	536	Gastroesophageal reflux disease	3	Rate	2001	66.1725089996407	117.51749337573	33.2335768415988
2	DALYs (Disability-Adjusted Life Years)	1	Global	2	Female	22	All ages	536	Gastroesophageal reflux disease	3	Rate	2001	73.7496964364213	130.160182328535	37.3626869042259
2	DALYs (Disability-Adjusted Life Years)	1	Global	3	Both	22	All ages	536	Gastroesophageal reflux disease	3	Rate	2001	69.9336447934603	123.75219397472	35.2831689604082
2	DALYs (Disability-Adjusted Life Years)	1	Global	1	Male	27	Age-standardized	536	Gastroesophageal reflux disease	3	Rate	2001	70.4792019315925	125.515317373958	35.3832160503794
2	DALYs (Disability-Adjusted Life Years)	1	Global	2	Female	27	Age-standardized	536	Gastroesophageal reflux disease	3	Rate	2001	75.9232383738958	134.466304607925	38.394254048083
2	DALYs (Disability-Adjusted Life Years)	1	Global	3	Both	27	Age-standardized	536	Gastroesophageal reflux disease	3	Rate	2001	73.2130114645067	130.076125202939	36.933295972892
2	DALYs (Disability-Adjusted Life Years)	1	Global	1	Male	22	All ages	536	Gastroesophageal reflux disease	1	Number	2002	2096467.27003821	3726175.50233997	1053751.35022917
2	DALYs (Disability-Adjusted Life Years)	1	Global	2	Female	22	All ages	536	Gastroesophageal reflux disease	1	Number	2002	2298565.7406293	4061645.84308764	1162855.84028867
2	DALYs (Disability-Adjusted Life Years)	1	Global	3	Both	22	All ages	536	Gastroesophageal reflux disease	1	Number	2002	4395033.01066751	7786086.19442474	2216607.19051784
2	DALYs (Disability-Adjusted Life Years)	1	Global	1	Male	22	All ages	536	Gastroesophageal reflux disease	3	Rate	2002	66.5625963350724	118.305646541942	33.4564849951428
2	DALYs (Disability-Adjusted Life Years)	1	Global	2	Female	22	All ages	536	Gastroesophageal reflux disease	3	Rate	2002	74.0097344489837	130.777782405491	37.4418927511955
2	DALYs (Disability-Adjusted Life Years)	1	Global	3	Both	22	All ages	536	Gastroesophageal reflux disease	3	Rate	2002	70.2600595673678	124.470255055913	35.4352180894281
2	DALYs (Disability-Adjusted Life Years)	1	Global	1	Male	27	Age-standardized	536	Gastroesophageal reflux disease	3	Rate	2002	70.4483675376681	125.557322120739	35.4022029648031
2	DALYs (Disability-Adjusted Life Years)	1	Global	2	Female	27	Age-standardized	536	Gastroesophageal reflux disease	3	Rate	2002	75.7074175573306	134.214566602442	38.3032218651277
2	DALYs (Disability-Adjusted Life Years)	1	Global	3	Both	27	Age-standardized	536	Gastroesophageal reflux disease	3	Rate	2002	73.0895235270382	129.907742702621	36.8672422731679
2	DALYs (Disability-Adjusted Life Years)	1	Global	1	Male	22	All ages	536	Gastroesophageal reflux disease	1	Number	2003	2134695.49819797	3800392.73710896	1073449.37974486
2	DALYs (Disability-Adjusted Life Years)	1	Global	2	Female	22	All ages	536	Gastroesophageal reflux disease	1	Number	2003	2334259.65422575	4131017.84268702	1180987.09096583
2	DALYs (Disability-Adjusted Life Years)	1	Global	3	Both	22	All ages	536	Gastroesophageal reflux disease	1	Number	2003	4468955.15242371	7931410.57979598	2254436.47071069
2	DALYs (Disability-Adjusted Life Years)	1	Global	1	Male	22	All ages	536	Gastroesophageal reflux disease	3	Rate	2003	66.9296801595004	119.154732180731	33.6561461409307
2	DALYs (Disability-Adjusted Life Years)	1	Global	2	Female	22	All ages	536	Gastroesophageal reflux disease	3	Rate	2003	74.1821599704971	131.28266424535	37.5314601983207
2	DALYs (Disability-Adjusted Life Years)	1	Global	3	Both	22	All ages	536	Gastroesophageal reflux disease	3	Rate	2003	70.5314244478805	125.177735509519	35.5807141005298
2	DALYs (Disability-Adjusted Life Years)	1	Global	1	Male	27	Age-standardized	536	Gastroesophageal reflux disease	3	Rate	2003	70.3887439004108	125.497141959528	35.3957115963241
2	DALYs (Disability-Adjusted Life Years)	1	Global	2	Female	27	Age-standardized	536	Gastroesophageal reflux disease	3	Rate	2003	75.4049052299954	133.691471101294	38.1777526300504
2	DALYs (Disability-Adjusted Life Years)	1	Global	3	Both	27	Age-standardized	536	Gastroesophageal reflux disease	3	Rate	2003	72.9077260938947	129.616446894774	36.7943
2	DALYs (Disability-Adjusted Life Years)	1	Global	1	Male	22	All ages	536	Gastroesophageal reflux disease	1	Number	2004	2174028.42573959	3879050.34503184	1093675.83566222
2	DALYs (Disability-Adjusted Life Years)	1	Global	2	Female	22	All ages	536	Gastroesophageal reflux disease	1	Number	2004	2371819.49502164	4208131.33554532	1198886.33686664
2	DALYs (Disability-Adjusted Life Years)	1	Global	3	Both	22	All ages	536	Gastroesophageal reflux disease	1	Number	2004	4545847.92076124	8087181.68057716	2292562.17252887
2	DALYs (Disability-Adjusted Life Years)	1	Global	1	Male	22	All ages	536	Gastroesophageal reflux disease	3	Rate	2004	67.3079942968389	120.095531139034	33.8602412175455
2	DALYs (Disability-Adjusted Life Years)	1	Global	2	Female	22	All ages	536	Gastroesophageal reflux disease	3	Rate	2004	74.3889909178644	131.982490386861	37.6014890728061
2	DALYs (Disability-Adjusted Life Years)	1	Global	3	Both	22	All ages	536	Gastroesophageal reflux disease	3	Rate	2004	70.8255621335611	126.000517084434	35.7187498186927
2	DALYs (Disability-Adjusted Life Years)	1	Global	1	Male	27	Age-standardized	536	Gastroesophageal reflux disease	3	Rate	2004	70.3247426847138	125.58688144142	35.3380364635657
2	DALYs (Disability-Adjusted Life Years)	1	Global	2	Female	27	Age-standardized	536	Gastroesophageal reflux disease	3	Rate	2004	75.1259936046008	133.225185533729	38.0627053949676
2	DALYs (Disability-Adjusted Life Years)	1	Global	3	Both	27	Age-standardized	536	Gastroesophageal reflux disease	3	Rate	2004	72.7356571799251	129.426824079812	36.6782499367893
2	DALYs (Disability-Adjusted Life Years)	6	China	1	Male	22	All ages	536	Gastroesophageal reflux disease	1	Number	2000	217574.275635627	385937.023637709	108884.352969674
2	DALYs (Disability-Adjusted Life Years)	6	China	2	Female	22	All ages	536	Gastroesophageal reflux disease	1	Number	2000	235442.290499214	423946	118732.810357665
2	DALYs (Disability-Adjusted Life Years)	6	China	3	Both	22	All ages	536	Gastroesophageal reflux disease	1	Number	2000	453016.566134841	809883.442263909	227613.511834814
2	DALYs (Disability-Adjusted Life Years)	6	China	1	Male	22	All ages	536	Gastroesophageal reflux disease	3	Rate	2000	33.5423283480636	59.4979637676003	16.7861513435149
2	DALYs (Disability-Adjusted Life Years)	6	China	2	Female	22	All ages	536	Gastroesophageal reflux disease	3	Rate	2000	38.5699100212359	69.450459327282	19.450684931554
2	DALYs (Disability-Adjusted Life Years)	6	China	3	Both	22	All ages	536	Gastroesophageal reflux disease	3	Rate	2000	35.9798004243627	64.323132525308	18.0776804689022
2	DALYs (Disability-Adjusted Life Years)	6	China	1	Male	27	Age-standardized	536	Gastroesophageal reflux disease	3	Rate	2000	31.8044047173493	56.5246497868376	15.9010749504295
2	DALYs (Disability-Adjusted Life Years)	6	China	2	Female	27	Age-standardized	536	Gastroesophageal reflux disease	3	Rate	2000	35.8940300224717	64.6450164042865	18.1637500848775
2	DALYs (Disability-Adjusted Life Years)	6	China	3	Both	27	Age-standardized	536	Gastroesophageal reflux disease	3	Rate	2000	33.8215965608351	60.5316362658293	16.9118974919922
2	DALYs (Disability-Adjusted Life Years)	6	China	1	Male	22	All ages	536	Gastroesophageal reflux disease	1	Number	1999	213866.793100453	380002.062004029	107019.514057962
2	DALYs (Disability-Adjusted Life Years)	6	China	2	Female	22	All ages	536	Gastroesophageal reflux disease	1	Number	1999	231475.437203311	415570.500888888	116614.557706827
2	DALYs (Disability-Adjusted Life Years)	6	China	3	Both	22	All ages	536	Gastroesophageal reflux disease	1	Number	1999	445342.230303764	795572.562892918	223608.436040197
2	DALYs (Disability-Adjusted Life Years)	6	China	1	Male	22	All ages	536	Gastroesophageal reflux disease	3	Rate	1999	33.0705320705263	58.7602694003446	16.5485825102526
2	DALYs (Disability-Adjusted Life Years)	6	China	2	Female	22	All ages	536	Gastroesophageal reflux disease	3	Rate	1999	38.1057288920975	68.4116510751692	19.1972106178384
2	DALYs (Disability-Adjusted Life Years)	6	China	3	Both	22	All ages	536	Gastroesophageal reflux disease	3	Rate	1999	35.5093533455694	63.434961531799	17.829413934056
2	DALYs (Disability-Adjusted Life Years)	6	China	1	Male	27	Age-standardized	536	Gastroesophageal reflux disease	3	Rate	1999	31.7270779313995	56.4817064065221	15.8775310990396
2	DALYs (Disability-Adjusted Life Years)	6	China	2	Female	27	Age-standardized	536	Gastroesophageal reflux disease	3	Rate	1999	35.9018131204217	64.5117513304909	18.1620447968056
2	DALYs (Disability-Adjusted Life Years)	6	China	3	Both	27	Age-standardized	536	Gastroesophageal reflux disease	3	Rate	1999	33.7842375379653	60.440979291538	16.8939059315029
2	DALYs (Disability-Adjusted Life Years)	1	Global	1	Male	22	All ages	536	Gastroesophageal reflux disease	1	Number	2005	2215690.82635701	3962222.77388538	1114593.70171658
2	DALYs (Disability-Adjusted Life Years)	1	Global	2	Female	22	All ages	536	Gastroesophageal reflux disease	1	Number	2005	2414046.2815526	4290967.84296525	1221051.7196507
2	DALYs (Disability-Adjusted Life Years)	1	Global	3	Both	22	All ages	536	Gastroesophageal reflux disease	1	Number	2005	4629737.10790962	8253142.48669294	2334312.30369056
2	DALYs (Disability-Adjusted Life Years)	1	Global	1	Male	22	All ages	536	Gastroesophageal reflux disease	3	Rate	2005	67.7317182737634	121.121662583194	34.0721483775345
2	DALYs (Disability-Adjusted Life Years)	1	Global	2	Female	22	All ages	536	Gastroesophageal reflux disease	3	Rate	2005	74.7134605617431	132.803194021989	37.7909074060075
2	DALYs (Disability-Adjusted Life Years)	1	Global	3	Both	22	All ages	536	Gastroesophageal reflux disease	3	Rate	2005	71.2010062749735	126.925576179982	35.8995297376319
2	DALYs (Disability-Adjusted Life Years)	1	Global	1	Male	27	Age-standardized	536	Gastroesophageal reflux disease	3	Rate	2005	70.3122982947793	125.665935243828	35.2457102345841
2	DALYs (Disability-Adjusted Life Years)	1	Global	2	Female	27	Age-standardized	536	Gastroesophageal reflux disease	3	Rate	2005	74.9754727471807	132.980270721958	38.0377889937599
2	DALYs (Disability-Adjusted Life Years)	1	Global	3	Both	27	Age-standardized	536	Gastroesophageal reflux disease	3	Rate	2005	72.6539156741361	129.347014316728	36.6313397487576
2	DALYs (Disability-Adjusted Life Years)	6	China	1	Male	22	All ages	536	Gastroesophageal reflux disease	1	Number	2001	220676.126916208	392769.06349251	110885.522069503
2	DALYs (Disability-Adjusted Life Years)	6	China	2	Female	22	All ages	536	Gastroesophageal reflux disease	1	Number	2001	239512.406238063	431441.833520762	120291.469733693
2	DALYs (Disability-Adjusted Life Years)	6	China	3	Both	22	All ages	536	Gastroesophageal reflux disease	1	Number	2001	460188.533154271	824186.944631266	231301.563497118
2	DALYs (Disability-Adjusted Life Years)	6	China	1	Male	22	All ages	536	Gastroesophageal reflux disease	3	Rate	2001	33.8954223518259	60.328561498022	17.0317997500275
2	DALYs (Disability-Adjusted Life Years)	6	China	2	Female	22	All ages	536	Gastroesophageal reflux disease	3	Rate	2001	39.021114231256	70.2900586002327	19.5977622005042
2	DALYs (Disability-Adjusted Life Years)	6	China	3	Both	22	All ages	536	Gastroesophageal reflux disease	3	Rate	2001	36.3827965713162	65.1607412677569	18.2868479439532
2	DALYs (Disability-Adjusted Life Years)	6	China	1	Male	27	Age-standardized	536	Gastroesophageal reflux disease	3	Rate	2001	31.7828363971851	56.613835935129	15.9226385754483
2	DALYs (Disability-Adjusted Life Years)	6	China	2	Female	27	Age-standardized	536	Gastroesophageal reflux disease	3	Rate	2001	35.8744575006347	64.5532842386913	18.1496920025813
2	DALYs (Disability-Adjusted Life Years)	6	China	3	Both	27	Age-standardized	536	Gastroesophageal reflux disease	3	Rate	2001	33.802540303361	60.5240288009607	16.9374239578394
2	DALYs (Disability-Adjusted Life Years)	6	China	1	Male	22	All ages	536	Gastroesophageal reflux disease	1	Number	2004	230151.756603149	414719.750546492	115082.140256457
2	DALYs (Disability-Adjusted Life Years)	6	China	2	Female	22	All ages	536	Gastroesophageal reflux disease	1	Number	2004	252512.112620602	455245.771640003	126383.233940867
2	DALYs (Disability-Adjusted Life Years)	6	China	3	Both	22	All ages	536	Gastroesophageal reflux disease	1	Number	2004	482663.86922375	868406.269933748	240388.484633241
2	DALYs (Disability-Adjusted Life Years)	6	China	1	Male	22	All ages	536	Gastroesophageal reflux disease	3	Rate	2004	34.8839597181158	62.8588166603327	17.4429289796951
2	DALYs (Disability-Adjusted Life Years)	6	China	2	Female	22	All ages	536	Gastroesophageal reflux disease	3	Rate	2004	40.3721205588535	72.785566544973	20.2063936827646
2	DALYs (Disability-Adjusted Life Years)	6	China	3	Both	22	All ages	536	Gastroesophageal reflux disease	3	Rate	2004	37.5548015250959	67.5683994390561	18.7039934102358
2	DALYs (Disability-Adjusted Life Years)	6	China	1	Male	27	Age-standardized	536	Gastroesophageal reflux disease	3	Rate	2004	31.6191252612453	56.5128158368023	15.8369260761917
2	DALYs (Disability-Adjusted Life Years)	6	China	2	Female	27	Age-standardized	536	Gastroesophageal reflux disease	3	Rate	2004	35.7692271091796	64.4664702891918	17.9806761608326
2	DALYs (Disability-Adjusted Life Years)	6	China	3	Both	27	Age-standardized	536	Gastroesophageal reflux disease	3	Rate	2004	33.6716588058759	60.1132260415718	16.8500406381744
2	DALYs (Disability-Adjusted Life Years)	1	Global	1	Male	22	All ages	536	Gastroesophageal reflux disease	1	Number	2006	2257210.34928364	4034461.38144149	1134296.58140196
2	DALYs (Disability-Adjusted Life Years)	1	Global	2	Female	22	All ages	536	Gastroesophageal reflux disease	1	Number	2006	2458524.06730313	4369739.37880605	1242184.19977254
2	DALYs (Disability-Adjusted Life Years)	1	Global	3	Both	22	All ages	536	Gastroesophageal reflux disease	1	Number	2006	4715734.41658677	8404876.83633944	2376480.78117449
2	DALYs (Disability-Adjusted Life Years)	1	Global	1	Male	22	All ages	536	Gastroesophageal reflux disease	3	Rate	2006	68.1146872499729	121.745886601217	34.2290903084987
2	DALYs (Disability-Adjusted Life Years)	1	Global	2	Female	22	All ages	536	Gastroesophageal reflux disease	3	Rate	2006	75.0721476588421	133.431974182882	37.9306580338254
2	DALYs (Disability-Adjusted Life Years)	1	Global	3	Both	22	All ages	536	Gastroesophageal reflux disease	3	Rate	2006	71.5728492615529	127.564644173632	36.0689313048912
2	DALYs (Disability-Adjusted Life Years)	1	Global	1	Male	27	Age-standardized	536	Gastroesophageal reflux disease	3	Rate	2006	70.2596463974184	125.452691101941	35.2373204083719
2	DALYs (Disability-Adjusted Life Years)	1	Global	2	Female	27	Age-standardized	536	Gastroesophageal reflux disease	3	Rate	2006	74.8658803853424	132.756735196842	37.9488
2	DALYs (Disability-Adjusted Life Years)	1	Global	3	Both	27	Age-standardized	536	Gastroesophageal reflux disease	3	Rate	2006	72.572741396198	129.125395171987	36.622664689667
2	DALYs (Disability-Adjusted Life Years)	6	China	1	Male	22	All ages	536	Gastroesophageal reflux disease	1	Number	2002	223888.18143811	399049.208607256	112462.782432617
2	DALYs (Disability-Adjusted Life Years)	6	China	2	Female	22	All ages	536	Gastroesophageal reflux disease	1	Number	2002	243656.32306615	437297.062845792	121745.438848661
2	DALYs (Disability-Adjusted Life Years)	6	China	3	Both	22	All ages	536	Gastroesophageal reflux disease	1	Number	2002	467544.504504261	835990.461753223	234182.791749114
2	DALYs (Disability-Adjusted Life Years)	6	China	1	Male	22	All ages	536	Gastroesophageal reflux disease	3	Rate	2002	34.2444894325899	61.0359882306339	17.2015804489349
2	DALYs (Disability-Adjusted Life Years)	6	China	2	Female	22	All ages	536	Gastroesophageal reflux disease	3	Rate	2002	39.4585454246126	70.8173947682275	19.715876315449
2	DALYs (Disability-Adjusted Life Years)	6	China	3	Both	22	All ages	536	Gastroesophageal reflux disease	3	Rate	2002	36.7770900696656	65.7590800727707	18.4208381062137
2	DALYs (Disability-Adjusted Life Years)	6	China	1	Male	27	Age-standardized	536	Gastroesophageal reflux disease	3	Rate	2002	31.758	56.5141340534919	15.9000528939039
2	DALYs (Disability-Adjusted Life Years)	6	China	2	Female	27	Age-standardized	536	Gastroesophageal reflux disease	3	Rate	2002	35.8457597549133	64.1818486079877	17.9846842663235
2	DALYs (Disability-Adjusted Life Years)	6	China	3	Both	27	Age-standardized	536	Gastroesophageal reflux disease	3	Rate	2002	33.7772865450818	60.2931931778427	16.8918666152302
2	DALYs (Disability-Adjusted Life Years)	6	China	1	Male	22	All ages	536	Gastroesophageal reflux disease	1	Number	2003	226949.015534352	406051.201372519	113906.150019797
2	DALYs (Disability-Adjusted Life Years)	6	China	2	Female	22	All ages	536	Gastroesophageal reflux disease	1	Number	2003	247918.390259488	446181.356277462	123851.504750918
2	DALYs (Disability-Adjusted Life Years)	6	China	3	Both	22	All ages	536	Gastroesophageal reflux disease	1	Number	2003	474867.405793842	851803.002266963	237470.158104688
2	DALYs (Disability-Adjusted Life Years)	6	China	1	Male	22	All ages	536	Gastroesophageal reflux disease	3	Rate	2003	34.5582337397464	61.8306816370055	17.3448443806223
2	DALYs (Disability-Adjusted Life Years)	6	China	2	Female	22	All ages	536	Gastroesophageal reflux disease	3	Rate	2003	39.8966167267989	71.8023642514512	19.9309781372524
2	DALYs (Disability-Adjusted Life Years)	6	China	3	Both	22	All ages	536	Gastroesophageal reflux disease	3	Rate	2003	37.1536789490089	66.6452	18.5796917340381
2	DALYs (Disability-Adjusted Life Years)	6	China	1	Male	27	Age-standardized	536	Gastroesophageal reflux disease	3	Rate	2003	31.6948688597406	56.4232715945184	15.9062157282988
2	DALYs (Disability-Adjusted Life Years)	6	China	2	Female	27	Age-standardized	536	Gastroesophageal reflux disease	3	Rate	2003	35.8043821803174	64.2321177652002	17.9544864232998
2	DALYs (Disability-Adjusted Life Years)	6	China	3	Both	27	Age-standardized	536	Gastroesophageal reflux disease	3	Rate	2003	33.7260801594154	60.2093680238109	16.8998643339864
2	DALYs (Disability-Adjusted Life Years)	6	China	1	Male	22	All ages	536	Gastroesophageal reflux disease	1	Number	2005	233369.303872129	421440.482187672	116622.160423233
2	DALYs (Disability-Adjusted Life Years)	6	China	2	Female	22	All ages	536	Gastroesophageal reflux disease	1	Number	2005	256949.652906499	470057.203355186	128430.301762169
2	DALYs (Disability-Adjusted Life Years)	6	China	3	Both	22	All ages	536	Gastroesophageal reflux disease	1	Number	2005	490318.956778627	885054.220429474	244417.206367068
2	DALYs (Disability-Adjusted Life Years)	6	China	1	Male	22	All ages	536	Gastroesophageal reflux disease	3	Rate	2005	35.1943705443301	63.5573412886436	17.5877609416212
2	DALYs (Disability-Adjusted Life Years)	6	China	2	Female	22	All ages	536	Gastroesophageal reflux disease	3	Rate	2005	40.8007379933461	74.6398392799497	20.3932989725089
2	DALYs (Disability-Adjusted Life Years)	6	China	3	Both	22	All ages	536	Gastroesophageal reflux disease	3	Rate	2005	37.9253097183442	68.4573887329223	18.9052414225718
2	DALYs (Disability-Adjusted Life Years)	6	China	1	Male	27	Age-standardized	536	Gastroesophageal reflux disease	3	Rate	2005	31.5381528208005	56.3577764250221	15.8037327662109
2	DALYs (Disability-Adjusted Life Years)	6	China	2	Female	27	Age-standardized	536	Gastroesophageal reflux disease	3	Rate	2005	35.7068926045754	65.1278110085221	17.9506008003873
2	DALYs (Disability-Adjusted Life Years)	6	China	3	Both	27	Age-standardized	536	Gastroesophageal reflux disease	3	Rate	2005	33.6014767575058	60.2106459221879	16.7912690912271
2	DALYs (Disability-Adjusted Life Years)	6	China	1	Male	22	All ages	536	Gastroesophageal reflux disease	1	Number	2006	234987.839374601	422941.812003858	117400.300823914
2	DALYs (Disability-Adjusted Life Years)	6	China	2	Female	22	All ages	536	Gastroesophageal reflux disease	1	Number	2006	259961.829479004	472337.062428466	130390.283580906
2	DALYs (Disability-Adjusted Life Years)	6	China	3	Both	22	All ages	536	Gastroesophageal reflux disease	1	Number	2006	494949.668853605	890114.525491345	247793.125242711
2	DALYs (Disability-Adjusted Life Years)	6	China	1	Male	22	All ages	536	Gastroesophageal reflux disease	3	Rate	2006	35.2368681228778	63.4209195373441	17.6043957369377
2	DALYs (Disability-Adjusted Life Years)	6	China	2	Female	22	All ages	536	Gastroesophageal reflux disease	3	Rate	2006	40.974586526855	74.4486829974352	20.5518170400416
2	DALYs (Disability-Adjusted Life Years)	6	China	3	Both	22	All ages	536	Gastroesophageal reflux disease	3	Rate	2006	38.0342242529808	68.4005215152228	19.0415710665235
2	DALYs (Disability-Adjusted Life Years)	6	China	1	Male	27	Age-standardized	536	Gastroesophageal reflux disease	3	Rate	2006	31.2368704915885	55.5677478704079	15.5853856186038
2	DALYs (Disability-Adjusted Life Years)	6	China	2	Female	27	Age-standardized	536	Gastroesophageal reflux disease	3	Rate	2006	35.4321389925878	64.1450764481557	17.8569324158733
2	DALYs (Disability-Adjusted Life Years)	6	China	3	Both	27	Age-standardized	536	Gastroesophageal reflux disease	3	Rate	2006	33.314792300126	59.2983847817821	16.6447822095702
2	DALYs (Disability-Adjusted Life Years)	1	Global	1	Male	22	All ages	536	Gastroesophageal reflux disease	1	Number	2007	2296622.95980336	4105499.74801899	1155221.49751594
2	DALYs (Disability-Adjusted Life Years)	1	Global	2	Female	22	All ages	536	Gastroesophageal reflux disease	1	Number	2007	2501889.22411226	4448735.81837427	1263146.7949289
2	DALYs (Disability-Adjusted Life Years)	1	Global	3	Both	22	All ages	536	Gastroesophageal reflux disease	1	Number	2007	4798512.18391561	8554649.02970967	2418299.6307164
2	DALYs (Disability-Adjusted Life Years)	1	Global	1	Male	22	All ages	536	Gastroesophageal reflux disease	3	Rate	2007	68.3998493135692	122.273254703262	34.4057242903519
2	DALYs (Disability-Adjusted Life Years)	1	Global	2	Female	22	All ages	536	Gastroesophageal reflux disease	3	Rate	2007	75.3639713444812	134.008490665326	38.0495498919116
2	DALYs (Disability-Adjusted Life Years)	1	Global	3	Both	22	All ages	536	Gastroesophageal reflux disease	3	Rate	2007	71.8621457796121	128.113759453825	36.2162674471976
2	DALYs (Disability-Adjusted Life Years)	1	Global	1	Male	27	Age-standardized	536	Gastroesophageal reflux disease	3	Rate	2007	70.1158646421882	125.293325323052	35.1361446203927
2	DALYs (Disability-Adjusted Life Years)	1	Global	2	Female	27	Age-standardized	536	Gastroesophageal reflux disease	3	Rate	2007	74.7040310864258	132.577678362156	37.8342923962125
2	DALYs (Disability-Adjusted Life Years)	1	Global	3	Both	27	Age-standardized	536	Gastroesophageal reflux disease	3	Rate	2007	72.4201351988711	128.954722618873	36.5255049502968
2	DALYs (Disability-Adjusted Life Years)	1	Global	1	Male	22	All ages	536	Gastroesophageal reflux disease	1	Number	2010	2424746.61671318	4335549.45516472	1219254.71040241
2	DALYs (Disability-Adjusted Life Years)	1	Global	2	Female	22	All ages	536	Gastroesophageal reflux disease	1	Number	2010	2646066.10386723	4702097.23028292	1335433.09114729
2	DALYs (Disability-Adjusted Life Years)	1	Global	3	Both	22	All ages	536	Gastroesophageal reflux disease	1	Number	2010	5070812.72058041	9044780.24498044	2555379.63376261
2	DALYs (Disability-Adjusted Life Years)	1	Global	1	Male	22	All ages	536	Gastroesophageal reflux disease	3	Rate	2010	69.4235750526931	124.132287027703	34.908810806265
2	DALYs (Disability-Adjusted Life Years)	1	Global	2	Female	22	All ages	536	Gastroesophageal reflux disease	3	Rate	2010	76.5185538689434	135.974562270598	38.6178594608725
2	DALYs (Disability-Adjusted Life Years)	1	Global	3	Both	22	All ages	536	Gastroesophageal reflux disease	3	Rate	2010	72.9533986050089	130.126568435216	36.7640532754022
2	DALYs (Disability-Adjusted Life Years)	1	Global	1	Male	27	Age-standardized	536	Gastroesophageal reflux disease	3	Rate	2010	69.9082468649342	125.041951850033	35.0660463587109
2	DALYs (Disability-Adjusted Life Years)	1	Global	2	Female	27	Age-standardized	536	Gastroesophageal reflux disease	3	Rate	2010	74.5549779400637	132.474262885215	37.7122405044613
2	DALYs (Disability-Adjusted Life Years)	1	Global	3	Both	27	Age-standardized	536	Gastroesophageal reflux disease	3	Rate	2010	72.243959813432	128.77404181182	36.4526966126174
2	DALYs (Disability-Adjusted Life Years)	1	Global	1	Male	22	All ages	536	Gastroesophageal reflux disease	1	Number	2008	2336387.04285812	4178116.91732153	1174913.35723717
2	DALYs (Disability-Adjusted Life Years)	1	Global	2	Female	22	All ages	536	Gastroesophageal reflux disease	1	Number	2008	2546165.02694094	4525240.59984659	1285365.12974078
2	DALYs (Disability-Adjusted Life Years)	1	Global	3	Both	22	All ages	536	Gastroesophageal reflux disease	1	Number	2008	4882552.06979906	8705459.26058985	2459795.71485916
2	DALYs (Disability-Adjusted Life Years)	1	Global	1	Male	22	All ages	536	Gastroesophageal reflux disease	3	Rate	2008	68.6594601653146	122.782418661224	34.5272060532569
2	DALYs (Disability-Adjusted Life Years)	1	Global	2	Female	22	All ages	536	Gastroesophageal reflux disease	3	Rate	2008	75.6508951468976	134.45259773471	38.1903850012131
2	DALYs (Disability-Adjusted Life Years)	1	Global	3	Both	22	All ages	536	Gastroesophageal reflux disease	3	Rate	2008	72.1359727819198	128.61650286545	36.341600498992
2	DALYs (Disability-Adjusted Life Years)	1	Global	1	Male	27	Age-standardized	536	Gastroesophageal reflux disease	3	Rate	2008	69.9561769943051	125.054234904749	35.0631548146926
2	DALYs (Disability-Adjusted Life Years)	1	Global	2	Female	27	Age-standardized	536	Gastroesophageal reflux disease	3	Rate	2008	74.5510895822804	132.32417664422	37.7466109931764
2	DALYs (Disability-Adjusted Life Years)	1	Global	3	Both	27	Age-standardized	536	Gastroesophageal reflux disease	3	Rate	2008	72.2642892631732	128.706703910974	36.4483266328216
2	DALYs (Disability-Adjusted Life Years)	1	Global	1	Male	22	All ages	536	Gastroesophageal reflux disease	1	Number	2009	2.37867e+06	4251544.14772662	1196040.92138487
2	DALYs (Disability-Adjusted Life Years)	1	Global	2	Female	22	All ages	536	Gastroesophageal reflux disease	1	Number	2009	2593690.83635399	4607897.49901719	1308466.88247841
2	DALYs (Disability-Adjusted Life Years)	1	Global	3	Both	22	All ages	536	Gastroesophageal reflux disease	1	Number	2009	4.97236e+06	8863935.96918489	2504355.25676871
2	DALYs (Disability-Adjusted Life Years)	1	Global	1	Male	22	All ages	536	Gastroesophageal reflux disease	3	Rate	2009	68.9726478780803	123.279309664298	34.6808345380632
2	DALYs (Disability-Adjusted Life Years)	1	Global	2	Female	22	All ages	536	Gastroesophageal reflux disease	3	Rate	2009	76.0088573016257	135.035763921523	38.3449990107573
2	DALYs (Disability-Adjusted Life Years)	1	Global	3	Both	22	All ages	536	Gastroesophageal reflux disease	3	Rate	2009	72.4721109662567	129.191894189702	36.5009856197822
2	DALYs (Disability-Adjusted Life Years)	1	Global	1	Male	27	Age-standardized	536	Gastroesophageal reflux disease	3	Rate	2009	69.8592573576979	124.916585796032	35.0143607208861
2	DALYs (Disability-Adjusted Life Years)	1	Global	2	Female	27	Age-standardized	536	Gastroesophageal reflux disease	3	Rate	2009	74.4761584396485	132.230336227002	37.6716978385073
2	DALYs (Disability-Adjusted Life Years)	1	Global	3	Both	27	Age-standardized	536	Gastroesophageal reflux disease	3	Rate	2009	72.1790310841111	128.589537757756	36.3913429551001
2	DALYs (Disability-Adjusted Life Years)	1	Global	1	Male	22	All ages	536	Gastroesophageal reflux disease	1	Number	2012	2526699.4285031	4516281.5855416	1269994.70139825
2	DALYs (Disability-Adjusted Life Years)	1	Global	2	Female	22	All ages	536	Gastroesophageal reflux disease	1	Number	2012	2760212.09970745	4901869.50458886	1392498.79806901
2	DALYs (Disability-Adjusted Life Years)	1	Global	3	Both	22	All ages	536	Gastroesophageal reflux disease	1	Number	2012	5286911.52821054	9427189.35113122	2662493.49946726
2	DALYs (Disability-Adjusted Life Years)	1	Global	1	Male	22	All ages	536	Gastroesophageal reflux disease	3	Rate	2012	70.6044597259061	126.200060727497	35.4879130993864
2	DALYs (Disability-Adjusted Life Years)	1	Global	2	Female	22	All ages	536	Gastroesophageal reflux disease	3	Rate	2012	77.8036655388993	138.17177871613	39.2512
2	DALYs (Disability-Adjusted Life Years)	1	Global	3	Both	22	All ages	536	Gastroesophageal reflux disease	3	Rate	2012	74.188401603416	132.286705733828	37.3613471591075
2	DALYs (Disability-Adjusted Life Years)	1	Global	1	Male	27	Age-standardized	536	Gastroesophageal reflux disease	3	Rate	2012	70.3215420634609	125.716270050389	35.3064067206182
2	DALYs (Disability-Adjusted Life Years)	1	Global	2	Female	27	Age-standardized	536	Gastroesophageal reflux disease	3	Rate	2012	75.0045465708948	133.339082342324	37.8936861624136
2	DALYs (Disability-Adjusted Life Years)	1	Global	3	Both	27	Age-standardized	536	Gastroesophageal reflux disease	3	Rate	2012	72.6776216007575	129.569662925474	36.664957784012
2	DALYs (Disability-Adjusted Life Years)	1	Global	1	Male	22	All ages	536	Gastroesophageal reflux disease	1	Number	2013	2580360.30462981	4617129.58926877	1296740.15461972
2	DALYs (Disability-Adjusted Life Years)	1	Global	2	Female	22	All ages	536	Gastroesophageal reflux disease	1	Number	2013	2819101.08414874	5006233.69061542	1423153.70175413
2	DALYs (Disability-Adjusted Life Years)	1	Global	3	Both	22	All ages	536	Gastroesophageal reflux disease	1	Number	2013	5399461.38877856	9631481.77369836	2719893.85637385
2	DALYs (Disability-Adjusted Life Years)	1	Global	1	Male	22	All ages	536	Gastroesophageal reflux disease	3	Rate	2013	71.2199528238936	127.436370393514	35.7910375815189
2	DALYs (Disability-Adjusted Life Years)	1	Global	2	Female	22	All ages	536	Gastroesophageal reflux disease	3	Rate	2013	78.4580399338408	139.327846392229	39.6076077555534
2	DALYs (Disability-Adjusted Life Years)	1	Global	3	Both	22	All ages	536	Gastroesophageal reflux disease	3	Rate	2013	74.8239739677365	133.469931464583	37.6914015029861
2	DALYs (Disability-Adjusted Life Years)	1	Global	1	Male	27	Age-standardized	536	Gastroesophageal reflux disease	3	Rate	2013	70.5822667980988	126.30152933668	35.4692643534105
2	DALYs (Disability-Adjusted Life Years)	1	Global	2	Female	27	Age-standardized	536	Gastroesophageal reflux disease	3	Rate	2013	75.2712718354411	133.828542967218	38.0377506094601
2	DALYs (Disability-Adjusted Life Years)	1	Global	3	Both	27	Age-standardized	536	Gastroesophageal reflux disease	3	Rate	2013	72.9421663268513	130.080951244215	36.7944021807431
2	DALYs (Disability-Adjusted Life Years)	1	Global	1	Male	22	All ages	536	Gastroesophageal reflux disease	1	Number	2011	2474515.27458463	4425815.13677858	1245333.45745428
2	DALYs (Disability-Adjusted Life Years)	1	Global	2	Female	22	All ages	536	Gastroesophageal reflux disease	1	Number	2011	2702286.83946849	4798910.41028421	1363765.73539285
2	DALYs (Disability-Adjusted Life Years)	1	Global	3	Both	22	All ages	536	Gastroesophageal reflux disease	1	Number	2011	5176802.11405313	9232383.44163335	2609016.88053225
2	DALYs (Disability-Adjusted Life Years)	1	Global	1	Male	22	All ages	536	Gastroesophageal reflux disease	3	Rate	2011	69.9962869830527	125.19244865033	35.2265831505927
2	DALYs (Disability-Adjusted Life Years)	1	Global	2	Female	22	All ages	536	Gastroesophageal reflux disease	3	Rate	2011	77.1501112746137	137.008576122566	38.9354219179627
2	DALYs (Disability-Adjusted Life Years)	1	Global	3	Both	22	All ages	536	Gastroesophageal reflux disease	3	Rate	2011	73.5566435813366	131.181977456496	37.0712498857228
2	DALYs (Disability-Adjusted Life Years)	1	Global	1	Male	27	Age-standardized	536	Gastroesophageal reflux disease	3	Rate	2011	70.0873811876616	125.384635321429	35.2139414125361
2	DALYs (Disability-Adjusted Life Years)	1	Global	2	Female	27	Age-standardized	536	Gastroesophageal reflux disease	3	Rate	2011	74.7591073029258	132.833354066564	37.7965195666299
2	DALYs (Disability-Adjusted Life Years)	1	Global	3	Both	27	Age-standardized	536	Gastroesophageal reflux disease	3	Rate	2011	72.4368322277462	129.168205618404	36.5743871866772
2	DALYs (Disability-Adjusted Life Years)	1	Global	1	Male	22	All ages	536	Gastroesophageal reflux disease	1	Number	2015	2689264.22118932	4816965.34343321	1350922.37254777
2	DALYs (Disability-Adjusted Life Years)	1	Global	2	Female	22	All ages	536	Gastroesophageal reflux disease	1	Number	2015	2937989.42214112	5219589.82931299	1482595.17278103
2	DALYs (Disability-Adjusted Life Years)	1	Global	3	Both	22	All ages	536	Gastroesophageal reflux disease	1	Number	2015	5627253.64333043	10043717.031031	2833517.5453288
2	DALYs (Disability-Adjusted Life Years)	1	Global	1	Male	22	All ages	536	Gastroesophageal reflux disease	3	Rate	2015	72.4326233292502	129.740110161674	36.385733535151
2	DALYs (Disability-Adjusted Life Years)	1	Global	2	Female	22	All ages	536	Gastroesophageal reflux disease	3	Rate	2015	79.7579792018032	141.696880836589	40.2482030957031
2	DALYs (Disability-Adjusted Life Years)	1	Global	3	Both	22	All ages	536	Gastroesophageal reflux disease	3	Rate	2015	76.0808664553526	135.791763191426	38.3093572155869
2	DALYs (Disability-Adjusted Life Years)	1	Global	1	Male	27	Age-standardized	536	Gastroesophageal reflux disease	3	Rate	2015	71.1201369678728	127.380378531834	35.7290076845205
2	DALYs (Disability-Adjusted Life Years)	1	Global	2	Female	27	Age-standardized	536	Gastroesophageal reflux disease	3	Rate	2015	75.8343861420507	134.842812019808	38.2764471673671
2	DALYs (Disability-Adjusted Life Years)	1	Global	3	Both	27	Age-standardized	536	Gastroesophageal reflux disease	3	Rate	2015	73.4940411999629	131.131685068002	37.0304029708463
2	DALYs (Disability-Adjusted Life Years)	1	Global	1	Male	22	All ages	536	Gastroesophageal reflux disease	1	Number	2016	2747550.52562128	4910390.18130315	1379205.16315966
2	DALYs (Disability-Adjusted Life Years)	1	Global	2	Female	22	All ages	536	Gastroesophageal reflux disease	1	Number	2016	3003921.91055027	5331999.34178426	1515734.16502064
2	DALYs (Disability-Adjusted Life Years)	1	Global	3	Both	22	All ages	536	Gastroesophageal reflux disease	1	Number	2016	5751472.43617155	10242389.5230874	2894559.26765596
2	DALYs (Disability-Adjusted Life Years)	1	Global	1	Male	22	All ages	536	Gastroesophageal reflux disease	3	Rate	2016	73.1122653474907	130.665385967368	36.7006222150389
2	DALYs (Disability-Adjusted Life Years)	1	Global	2	Female	22	All ages	536	Gastroesophageal reflux disease	3	Rate	2016	80.5638299356999	143.001815952693	40.6513062372132
2	DALYs (Disability-Adjusted Life Years)	1	Global	3	Both	22	All ages	536	Gastroesophageal reflux disease	3	Rate	2016	76.8234338835817	136.809407168187	38.6631397418112
2	DALYs (Disability-Adjusted Life Years)	1	Global	1	Male	27	Age-standardized	536	Gastroesophageal reflux disease	3	Rate	2016	71.4831781078219	127.746833232387	35.8908250799722
2	DALYs (Disability-Adjusted Life Years)	1	Global	2	Female	27	Age-standardized	536	Gastroesophageal reflux disease	3	Rate	2016	76.2875922282575	135.33380770397	38.5046643417021
2	DALYs (Disability-Adjusted Life Years)	1	Global	3	Both	27	Age-standardized	536	Gastroesophageal reflux disease	3	Rate	2016	73.9022717125873	131.560732879591	37.2024465275391
2	DALYs (Disability-Adjusted Life Years)	1	Global	1	Male	22	All ages	536	Gastroesophageal reflux disease	1	Number	2014	2634662.03056187	4718276.68144306	1323574.82043191
2	DALYs (Disability-Adjusted Life Years)	1	Global	2	Female	22	All ages	536	Gastroesophageal reflux disease	1	Number	2014	2878580.52966806	5112008.7910727	1452972.6054459
2	DALYs (Disability-Adjusted Life Years)	1	Global	3	Both	22	All ages	536	Gastroesophageal reflux disease	1	Number	2014	5513242.56022994	9839344.00310245	2776547.4258778
2	DALYs (Disability-Adjusted Life Years)	1	Global	1	Male	22	All ages	536	Gastroesophageal reflux disease	3	Rate	2014	71.8339561411133	128.64362725269	36.0872151712419
2	DALYs (Disability-Adjusted Life Years)	1	Global	2	Female	22	All ages	536	Gastroesophageal reflux disease	3	Rate	2014	79.1163784084825	140.501062163661	39.9342416461324
2	DALYs (Disability-Adjusted Life Years)	1	Global	3	Both	22	All ages	536	Gastroesophageal reflux disease	3	Rate	2014	75.4605656722813	134.672555434839	38.0030149378947
2	DALYs (Disability-Adjusted Life Years)	1	Global	1	Male	27	Age-standardized	536	Gastroesophageal reflux disease	3	Rate	2014	70.8487789864698	126.878263344839	35.6066353897083
2	DALYs (Disability-Adjusted Life Years)	1	Global	2	Female	27	Age-standardized	536	Gastroesophageal reflux disease	3	Rate	2014	75.5507836715375	134.345473527785	38.1614350068217
2	DALYs (Disability-Adjusted Life Years)	1	Global	3	Both	27	Age-standardized	536	Gastroesophageal reflux disease	3	Rate	2014	73.2160483580597	130.629881685548	36.9130138759715
2	DALYs (Disability-Adjusted Life Years)	6	China	1	Male	22	All ages	536	Gastroesophageal reflux disease	1	Number	2011	236719.77500369	421560.568488153	118426.48690066
2	DALYs (Disability-Adjusted Life Years)	6	China	2	Female	22	All ages	536	Gastroesophageal reflux disease	1	Number	2011	268617.090980557	481736.807717324	134814.901696866
2	DALYs (Disability-Adjusted Life Years)	6	China	3	Both	22	All ages	536	Gastroesophageal reflux disease	1	Number	2011	505336.865984247	903297.376205477	252757.618720801
2	DALYs (Disability-Adjusted Life Years)	6	China	1	Male	22	All ages	536	Gastroesophageal reflux disease	3	Rate	2011	34.4830158706373	61.4088103682308	17.251209482755
2	DALYs (Disability-Adjusted Life Years)	6	China	2	Female	22	All ages	536	Gastroesophageal reflux disease	3	Rate	2011	40.8617263658601	73.2812552822002	20.5078895131673
2	DALYs (Disability-Adjusted Life Years)	6	China	3	Both	22	All ages	536	Gastroesophageal reflux disease	3	Rate	2011	37.6033051459573	67.2164830263067	18.8082890928842
2	DALYs (Disability-Adjusted Life Years)	6	China	1	Male	27	Age-standardized	536	Gastroesophageal reflux disease	3	Rate	2011	29.213480545034	51.626640692053	14.5721321326908
2	DALYs (Disability-Adjusted Life Years)	6	China	2	Female	27	Age-standardized	536	Gastroesophageal reflux disease	3	Rate	2011	33.5465853537778	59.5549195736542	16.7816329666085
2	DALYs (Disability-Adjusted Life Years)	6	China	3	Both	27	Age-standardized	536	Gastroesophageal reflux disease	3	Rate	2011	31.3631032586986	55.5453186859446	15.7650712715545
2	DALYs (Disability-Adjusted Life Years)	6	China	1	Male	22	All ages	536	Gastroesophageal reflux disease	1	Number	2008	232614.710905329	416679.810445972	116069.437970156
2	DALYs (Disability-Adjusted Life Years)	6	China	2	Female	22	All ages	536	Gastroesophageal reflux disease	1	Number	2008	260904.822824763	469404.532255203	131135.187879857
2	DALYs (Disability-Adjusted Life Years)	6	China	3	Both	22	All ages	536	Gastroesophageal reflux disease	1	Number	2008	493519.533730091	886069.576631955	247354.219492534
2	DALYs (Disability-Adjusted Life Years)	6	China	1	Male	22	All ages	536	Gastroesophageal reflux disease	3	Rate	2008	34.438556726571	61.6893541814759	17.1840547323908
2	DALYs (Disability-Adjusted Life Years)	6	China	2	Female	22	All ages	536	Gastroesophageal reflux disease	3	Rate	2008	40.4833242038029	72.8352034902215	20.3476051841038
2	DALYs (Disability-Adjusted Life Years)	6	China	3	Both	22	All ages	536	Gastroesophageal reflux disease	3	Rate	2008	37.3900163648446	67.1303843239138	18.7400450896789
2	DALYs (Disability-Adjusted Life Years)	6	China	1	Male	27	Age-standardized	536	Gastroesophageal reflux disease	3	Rate	2008	29.9597615239449	53.1257333684202	14.9061857690972
2	DALYs (Disability-Adjusted Life Years)	6	China	2	Female	27	Age-standardized	536	Gastroesophageal reflux disease	3	Rate	2008	34.2515280411624	61.0080719520939	17.1818969777575
2	DALYs (Disability-Adjusted Life Years)	6	China	3	Both	27	Age-standardized	536	Gastroesophageal reflux disease	3	Rate	2008	32.0860295871042	56.9746095760712	16.0452904058253
2	DALYs (Disability-Adjusted Life Years)	6	China	1	Male	22	All ages	536	Gastroesophageal reflux disease	1	Number	2009	231828.653985341	414599.249622648	116026.273859843
2	DALYs (Disability-Adjusted Life Years)	6	China	2	Female	22	All ages	536	Gastroesophageal reflux disease	1	Number	2009	261558.335234179	470201.084150497	131247.455375322
2	DALYs (Disability-Adjusted Life Years)	6	China	3	Both	22	All ages	536	Gastroesophageal reflux disease	1	Number	2009	493386.98921952	884800.333773146	247611.69732738
2	DALYs (Disability-Adjusted Life Years)	6	China	1	Male	22	All ages	536	Gastroesophageal reflux disease	3	Rate	2009	34.1100765503202	61.0020025532654	17.0715
2	DALYs (Disability-Adjusted Life Years)	6	China	2	Female	22	All ages	536	Gastroesophageal reflux disease	3	Rate	2009	40.2822444078319	72.4150311463782	20.2132425663332
2	DALYs (Disability-Adjusted Life Years)	6	China	3	Both	22	All ages	536	Gastroesophageal reflux disease	3	Rate	2009	37.1257187377165	66.5782621926503	18.6319510485811
2	DALYs (Disability-Adjusted Life Years)	6	China	1	Male	27	Age-standardized	536	Gastroesophageal reflux disease	3	Rate	2009	29.4116366542549	52.1406701720906	14.6464792102317
2	DALYs (Disability-Adjusted Life Years)	6	China	2	Female	27	Age-standardized	536	Gastroesophageal reflux disease	3	Rate	2009	33.7311675798961	59.9782410138558	16.9368816915467
2	DALYs (Disability-Adjusted Life Years)	6	China	3	Both	27	Age-standardized	536	Gastroesophageal reflux disease	3	Rate	2009	31.5523418536684	56.0031243580689	15.802898594591
2	DALYs (Disability-Adjusted Life Years)	6	China	1	Male	22	All ages	536	Gastroesophageal reflux disease	1	Number	2010	233362.64503666	414460.628887645	116708.886673423
2	DALYs (Disability-Adjusted Life Years)	6	China	2	Female	22	All ages	536	Gastroesophageal reflux disease	1	Number	2010	264264.804425779	476277.888941563	132606.192058892
2	DALYs (Disability-Adjusted Life Years)	6	China	3	Both	22	All ages	536	Gastroesophageal reflux disease	1	Number	2010	497627.449462439	889274.032026404	249340.928387163
2	DALYs (Disability-Adjusted Life Years)	6	China	1	Male	22	All ages	536	Gastroesophageal reflux disease	3	Rate	2010	34.1515238883882	60.6543607955301	17.0797958284559
2	DALYs (Disability-Adjusted Life Years)	6	China	2	Female	22	All ages	536	Gastroesophageal reflux disease	3	Rate	2010	40.4308144803805	72.8674520647789	20.2878940376965
2	DALYs (Disability-Adjusted Life Years)	6	China	3	Both	22	All ages	536	Gastroesophageal reflux disease	3	Rate	2010	37.2214380906899	66.5157405695471	18.6501527185921
2	DALYs (Disability-Adjusted Life Years)	6	China	1	Male	27	Age-standardized	536	Gastroesophageal reflux disease	3	Rate	2010	29.1831810402389	51.4638945457264	14.4990137987728
2	DALYs (Disability-Adjusted Life Years)	6	China	2	Female	27	Age-standardized	536	Gastroesophageal reflux disease	3	Rate	2010	33.5150563870664	59.8009576245733	16.8160160352151
2	DALYs (Disability-Adjusted Life Years)	6	China	3	Both	27	Age-standardized	536	Gastroesophageal reflux disease	3	Rate	2010	31.3308568163117	55.4642077387426	15.6990336609802
2	DALYs (Disability-Adjusted Life Years)	6	China	1	Male	22	All ages	536	Gastroesophageal reflux disease	1	Number	2007	234204.543001499	420724.824384887	117243.301725493
2	DALYs (Disability-Adjusted Life Years)	6	China	2	Female	22	All ages	536	Gastroesophageal reflux disease	1	Number	2007	260872.85389721	469229.74059498	130933.075107057
2	DALYs (Disability-Adjusted Life Years)	6	China	3	Both	22	All ages	536	Gastroesophageal reflux disease	1	Number	2007	495077.396898709	889673.043110703	247599.63390503
2	DALYs (Disability-Adjusted Life Years)	6	China	1	Male	22	All ages	536	Gastroesophageal reflux disease	3	Rate	2007	34.8985757882948	62.6917692613634	17.470302661511
2	DALYs (Disability-Adjusted Life Years)	6	China	2	Female	22	All ages	536	Gastroesophageal reflux disease	3	Rate	2007	40.7970778831587	73.3813502867978	20.4762081712374
2	DALYs (Disability-Adjusted Life Years)	6	China	3	Both	22	All ages	536	Gastroesophageal reflux disease	3	Rate	2007	37.7765777295941	67.8859569787071	18.8929385074433
2	DALYs (Disability-Adjusted Life Years)	6	China	1	Male	27	Age-standardized	536	Gastroesophageal reflux disease	3	Rate	2007	30.6374431367696	54.461169500166	15.3341250076885
2	DALYs (Disability-Adjusted Life Years)	6	China	2	Female	27	Age-standardized	536	Gastroesophageal reflux disease	3	Rate	2007	34.884136437814	62.4526119891974	17.5134752971135
2	DALYs (Disability-Adjusted Life Years)	6	China	3	Both	27	Age-standardized	536	Gastroesophageal reflux disease	3	Rate	2007	32.7413514978531	58.1966697830723	16.4259851814355
2	DALYs (Disability-Adjusted Life Years)	6	China	1	Male	22	All ages	536	Gastroesophageal reflux disease	1	Number	2012	240478.57049932	430335.375142774	120327.671074028
2	DALYs (Disability-Adjusted Life Years)	6	China	2	Female	22	All ages	536	Gastroesophageal reflux disease	1	Number	2012	273296.017496157	489666.920906693	136835.595327156
2	DALYs (Disability-Adjusted Life Years)	6	China	3	Both	22	All ages	536	Gastroesophageal reflux disease	1	Number	2012	513774.587995477	924484.504649122	257175.331697086
2	DALYs (Disability-Adjusted Life Years)	6	China	1	Male	22	All ages	536	Gastroesophageal reflux disease	3	Rate	2012	34.8541443801789	62.3713425524004	17.4398825302261
2	DALYs (Disability-Adjusted Life Years)	6	China	2	Female	22	All ages	536	Gastroesophageal reflux disease	3	Rate	2012	41.3312110861669	74.0535008717882	20.6939747105811
2	DALYs (Disability-Adjusted Life Years)	6	China	3	Both	22	All ages	536	Gastroesophageal reflux disease	3	Rate	2012	38.0238347150897	68.4199779879912	19.0332346786573
2	DALYs (Disability-Adjusted Life Years)	6	China	1	Male	27	Age-standardized	536	Gastroesophageal reflux disease	3	Rate	2012	29.3229242977314	52.0294732007813	14.6858592080082
2	DALYs (Disability-Adjusted Life Years)	6	China	2	Female	27	Age-standardized	536	Gastroesophageal reflux disease	3	Rate	2012	33.6611145036385	60.2713223700501	16.8273504241311
2	DALYs (Disability-Adjusted Life Years)	6	China	3	Both	27	Age-standardized	536	Gastroesophageal reflux disease	3	Rate	2012	31.4761137001178	56.1076344280944	15.8475456768129
2	DALYs (Disability-Adjusted Life Years)	6	China	1	Male	22	All ages	536	Gastroesophageal reflux disease	1	Number	2013	244487.139213181	439141.45311171	122298.706124262
2	DALYs (Disability-Adjusted Life Years)	6	China	2	Female	22	All ages	536	Gastroesophageal reflux disease	1	Number	2013	278222.364890113	497346.779460272	139688.622365073
2	DALYs (Disability-Adjusted Life Years)	6	China	3	Both	22	All ages	536	Gastroesophageal reflux disease	1	Number	2013	522709.504103294	940257.844083517	261747.307414284
2	DALYs (Disability-Adjusted Life Years)	6	China	1	Male	22	All ages	536	Gastroesophageal reflux disease	3	Rate	2013	35.229523321532	63.2783553099727	17.6227065908814
2	DALYs (Disability-Adjusted Life Years)	6	China	2	Female	22	All ages	536	Gastroesophageal reflux disease	3	Rate	2013	41.8147444810495	74.7475082020019	20.9941571498477
2	DALYs (Disability-Adjusted Life Years)	6	China	3	Both	22	All ages	536	Gastroesophageal reflux disease	3	Rate	2013	38.4528238331862	69.1695271512992	19.2552900259172
2	DALYs (Disability-Adjusted Life Years)	6	China	1	Male	27	Age-standardized	536	Gastroesophageal reflux disease	3	Rate	2013	29.4865948362517	52.3802296631863	14.7708671379851
2	DALYs (Disability-Adjusted Life Years)	6	China	2	Female	27	Age-standardized	536	Gastroesophageal reflux disease	3	Rate	2013	33.8364964021431	60.4415219782992	16.9995037317566
2	DALYs (Disability-Adjusted Life Years)	6	China	3	Both	27	Age-standardized	536	Gastroesophageal reflux disease	3	Rate	2013	31.6462864840383	56.410045940872	15.8947143920166
2	DALYs (Disability-Adjusted Life Years)	6	China	1	Male	22	All ages	536	Gastroesophageal reflux disease	1	Number	2014	248750.811240108	448159.738511376	124830.514686893
2	DALYs (Disability-Adjusted Life Years)	6	China	2	Female	22	All ages	536	Gastroesophageal reflux disease	1	Number	2014	283320.184635817	505469.987397491	141784.616927746
2	DALYs (Disability-Adjusted Life Years)	6	China	3	Both	22	All ages	536	Gastroesophageal reflux disease	1	Number	2014	532070.995875925	955748.465876707	266341.644162905
2	DALYs (Disability-Adjusted Life Years)	6	China	1	Male	22	All ages	536	Gastroesophageal reflux disease	3	Rate	2014	35.6194084592726	64.1733978733803	17.8748727236181
2	DALYs (Disability-Adjusted Life Years)	6	China	2	Female	22	All ages	536	Gastroesophageal reflux disease	3	Rate	2014	42.314225300156	75.4925772644739	21.175710556905
2	DALYs (Disability-Adjusted Life Years)	6	China	3	Both	22	All ages	536	Gastroesophageal reflux disease	3	Rate	2014	38.8963532312277	69.8687	19.4705570343889
2	DALYs (Disability-Adjusted Life Years)	6	China	1	Male	27	Age-standardized	536	Gastroesophageal reflux disease	3	Rate	2014	29.6871084184852	52.8085691351132	14.8469821171193
2	DALYs (Disability-Adjusted Life Years)	6	China	2	Female	27	Age-standardized	536	Gastroesophageal reflux disease	3	Rate	2014	34.050567773048	60.7438075310902	17.0907403915943
2	DALYs (Disability-Adjusted Life Years)	6	China	3	Both	27	Age-standardized	536	Gastroesophageal reflux disease	3	Rate	2014	31.8536374573193	56.9802644391353	15.9416737751231
2	DALYs (Disability-Adjusted Life Years)	6	China	1	Male	22	All ages	536	Gastroesophageal reflux disease	1	Number	2015	253176.354779271	458532.551362279	127058.377021615
2	DALYs (Disability-Adjusted Life Years)	6	China	2	Female	22	All ages	536	Gastroesophageal reflux disease	1	Number	2015	288356.147526604	512613.715965604	143963.722897073
2	DALYs (Disability-Adjusted Life Years)	6	China	3	Both	22	All ages	536	Gastroesophageal reflux disease	1	Number	2015	541532.502305875	972921.694042709	271146.571283136
2	DALYs (Disability-Adjusted Life Years)	6	China	1	Male	22	All ages	536	Gastroesophageal reflux disease	3	Rate	2015	35.9973182147964	65.1954333477189	18.0655133987146
2	DALYs (Disability-Adjusted Life Years)	6	China	2	Female	22	All ages	536	Gastroesophageal reflux disease	3	Rate	2015	42.780217501706	76.0508366180855	21.3583078797511
2	DALYs (Disability-Adjusted Life Years)	6	China	3	Both	22	All ages	536	Gastroesophageal reflux disease	3	Rate	2015	39.3166742845872	70.6366565002223	19.6859493772365
2	DALYs (Disability-Adjusted Life Years)	6	China	1	Male	27	Age-standardized	536	Gastroesophageal reflux disease	3	Rate	2015	29.9234085144881	53.5439326763615	14.9496079979279
2	DALYs (Disability-Adjusted Life Years)	6	China	2	Female	27	Age-standardized	536	Gastroesophageal reflux disease	3	Rate	2015	34.2850779533863	60.9271728247762	17.2104518176979
2	DALYs (Disability-Adjusted Life Years)	6	China	3	Both	27	Age-standardized	536	Gastroesophageal reflux disease	3	Rate	2015	32.0889864108067	57.4109069943097	16.0591662614999
2	DALYs (Disability-Adjusted Life Years)	6	China	1	Male	22	All ages	536	Gastroesophageal reflux disease	1	Number	2017	271677.062104587	491002.861084504	136382.983717714
2	DALYs (Disability-Adjusted Life Years)	6	China	2	Female	22	All ages	536	Gastroesophageal reflux disease	1	Number	2017	309892.897926824	556518.689600681	155064.676653215
2	DALYs (Disability-Adjusted Life Years)	6	China	3	Both	22	All ages	536	Gastroesophageal reflux disease	1	Number	2017	581569.960031411	1047768.33534013	290849.369046829
2	DALYs (Disability-Adjusted Life Years)	6	China	1	Male	22	All ages	536	Gastroesophageal reflux disease	3	Rate	2017	38.0212391546086	68.7159124229053	19.0868157965947
2	DALYs (Disability-Adjusted Life Years)	6	China	2	Female	22	All ages	536	Gastroesophageal reflux disease	3	Rate	2017	45.3309650372771	81.4072520849986	22.6827768009817
2	DALYs (Disability-Adjusted Life Years)	6	China	3	Both	22	All ages	536	Gastroesophageal reflux disease	3	Rate	2017	41.595282921839	74.9389124958637	20.8022467193591
2	DALYs (Disability-Adjusted Life Years)	6	China	1	Male	27	Age-standardized	536	Gastroesophageal reflux disease	3	Rate	2017	31.457094132205	56.1450370647318	15.843613001901
2	DALYs (Disability-Adjusted Life Years)	6	China	2	Female	27	Age-standardized	536	Gastroesophageal reflux disease	3	Rate	2017	36.0743539332183	64.2785916454257	18.0767209956644
2	DALYs (Disability-Adjusted Life Years)	6	China	3	Both	27	Age-standardized	536	Gastroesophageal reflux disease	3	Rate	2017	33.747908505773	60.3087699955036	16.9437629784611
2	DALYs (Disability-Adjusted Life Years)	6	China	1	Male	22	All ages	536	Gastroesophageal reflux disease	1	Number	2016	260594.759805534	471525.633329033	130956.516438975
2	DALYs (Disability-Adjusted Life Years)	6	China	2	Female	22	All ages	536	Gastroesophageal reflux disease	1	Number	2016	297064.13882601	529350.862093743	149240.29536056
2	DALYs (Disability-Adjusted Life Years)	6	China	3	Both	22	All ages	536	Gastroesophageal reflux disease	1	Number	2016	557658.898631544	1000702.58522083	279534.246837367
2	DALYs (Disability-Adjusted Life Years)	6	China	1	Male	22	All ages	536	Gastroesophageal reflux disease	3	Rate	2016	36.7586616413191	66.5118946508552	18.4723065079987
2	DALYs (Disability-Adjusted Life Years)	6	China	2	Female	22	All ages	536	Gastroesophageal reflux disease	3	Rate	2016	43.7563669304148	77.9712780150531	21.9825023323494
2	DALYs (Disability-Adjusted Life Years)	6	China	3	Both	22	All ages	536	Gastroesophageal reflux disease	3	Rate	2016	40.1818079089871	72.1050792017179	20.1416877556612
2	DALYs (Disability-Adjusted Life Years)	6	China	1	Male	27	Age-standardized	536	Gastroesophageal reflux disease	3	Rate	2016	30.4911705756412	54.3578020978813	15.2877673497463
2	DALYs (Disability-Adjusted Life Years)	6	China	2	Female	27	Age-standardized	536	Gastroesophageal reflux disease	3	Rate	2016	34.9448503169624	62.0530606226194	17.5342126922939
2	DALYs (Disability-Adjusted Life Years)	6	China	3	Both	27	Age-standardized	536	Gastroesophageal reflux disease	3	Rate	2016	32.701927921128	58.3681401957673	16.3846234194685
2	DALYs (Disability-Adjusted Life Years)	1	Global	1	Male	22	All ages	536	Gastroesophageal reflux disease	1	Number	2019	2930843.80410023	5.22283e+06	1471392.17295771
2	DALYs (Disability-Adjusted Life Years)	1	Global	2	Female	22	All ages	536	Gastroesophageal reflux disease	1	Number	2019	3214303.9709492	5686068.66044246	1624202.39696244
2	DALYs (Disability-Adjusted Life Years)	1	Global	3	Both	22	All ages	536	Gastroesophageal reflux disease	1	Number	2019	6145147.77504943	10906810.1207994	3095594.56992014
2	DALYs (Disability-Adjusted Life Years)	1	Global	1	Male	22	All ages	536	Gastroesophageal reflux disease	3	Rate	2019	75.3864327680348	134.34020662049	37.8467822020773
2	DALYs (Disability-Adjusted Life Years)	1	Global	2	Female	22	All ages	536	Gastroesophageal reflux disease	3	Rate	2019	83.324618745935	147.4	42.1043083405592
2	DALYs (Disability-Adjusted Life Years)	1	Global	3	Both	22	All ages	536	Gastroesophageal reflux disease	3	Rate	2019	79.3400538029501	140.817915773526	39.9672471224842
2	DALYs (Disability-Adjusted Life Years)	1	Global	1	Male	27	Age-standardized	536	Gastroesophageal reflux disease	3	Rate	2019	72.7290077319277	129.411644364636	36.5170033885985
2	DALYs (Disability-Adjusted Life Years)	1	Global	2	Female	27	Age-standardized	536	Gastroesophageal reflux disease	3	Rate	2019	77.9107187975161	137.615191713559	39.3889972219587
2	DALYs (Disability-Adjusted Life Years)	1	Global	3	Both	27	Age-standardized	536	Gastroesophageal reflux disease	3	Rate	2019	75.3353107067788	133.514554517525	37.9620590595932
2	DALYs (Disability-Adjusted Life Years)	1	Global	1	Male	22	All ages	536	Gastroesophageal reflux disease	1	Number	2018	2874035.82333109	5125697.65859488	1444154.03649223
2	DALYs (Disability-Adjusted Life Years)	1	Global	2	Female	22	All ages	536	Gastroesophageal reflux disease	1	Number	2018	3150553.29529055	5578193.07958497	1590464.98310799
2	DALYs (Disability-Adjusted Life Years)	1	Global	3	Both	22	All ages	536	Gastroesophageal reflux disease	1	Number	2018	6024589.11862165	10703890.7381799	3034619.01960022
2	DALYs (Disability-Adjusted Life Years)	1	Global	1	Male	22	All ages	536	Gastroesophageal reflux disease	3	Rate	2018	74.7273962206285	133.272534994719	37.5492434758503
2	DALYs (Disability-Adjusted Life Years)	1	Global	2	Female	22	All ages	536	Gastroesophageal reflux disease	3	Rate	2018	82.561666900102	146.179059922449	41.6788506158338
2	DALYs (Disability-Adjusted Life Years)	1	Global	3	Both	22	All ages	536	Gastroesophageal reflux disease	3	Rate	2018	78.6291806159939	139.70050763209	39.6059552435448
2	DALYs (Disability-Adjusted Life Years)	1	Global	1	Male	27	Age-standardized	536	Gastroesophageal reflux disease	3	Rate	2018	72.4313516336582	128.994546196477	36.3947171977067
2	DALYs (Disability-Adjusted Life Years)	1	Global	2	Female	27	Age-standardized	536	Gastroesophageal reflux disease	3	Rate	2018	77.5366557061019	137.114941845934	39.1601149586313
2	DALYs (Disability-Adjusted Life Years)	1	Global	3	Both	27	Age-standardized	536	Gastroesophageal reflux disease	3	Rate	2018	75.0000539231993	133.074490552624	37.7863350755149
2	DALYs (Disability-Adjusted Life Years)	1	Global	1	Male	22	All ages	536	Gastroesophageal reflux disease	1	Number	2017	2811146.37568875	5016342.66255448	1411472.47759559
2	DALYs (Disability-Adjusted Life Years)	1	Global	2	Female	22	All ages	536	Gastroesophageal reflux disease	1	Number	2017	3077515.11097539	5460573.24336437	1555384.02348962
2	DALYs (Disability-Adjusted Life Years)	1	Global	3	Both	22	All ages	536	Gastroesophageal reflux disease	1	Number	2017	5888661.48666414	10476915.9059189	2966856.50108521
2	DALYs (Disability-Adjusted Life Years)	1	Global	1	Male	22	All ages	536	Gastroesophageal reflux disease	3	Rate	2017	73.9264264687542	131.917814807687	37.1183504459369
2	DALYs (Disability-Adjusted Life Years)	1	Global	2	Female	22	All ages	536	Gastroesophageal reflux disease	3	Rate	2017	81.5683593275364	144.730402414793	41.224857830219
2	DALYs (Disability-Adjusted Life Years)	1	Global	3	Both	22	All ages	536	Gastroesophageal reflux disease	3	Rate	2017	77.7324129800505	138.298993039502	39.163554454129
2	DALYs (Disability-Adjusted Life Years)	1	Global	1	Male	27	Age-standardized	536	Gastroesophageal reflux disease	3	Rate	2017	71.9735055810298	128.406621307669	36.1375254709049
2	DALYs (Disability-Adjusted Life Years)	1	Global	2	Female	27	Age-standardized	536	Gastroesophageal reflux disease	3	Rate	2017	76.9258833658177	136.383990670668	38.8983897833739
2	DALYs (Disability-Adjusted Life Years)	1	Global	3	Both	27	Age-standardized	536	Gastroesophageal reflux disease	3	Rate	2017	74.466243867179	132.415035873528	37.5264987101847
2	DALYs (Disability-Adjusted Life Years)	6	China	1	Male	22	All ages	536	Gastroesophageal reflux disease	1	Number	2021	292425.795511142	524768.372434508	146508.191140075
2	DALYs (Disability-Adjusted Life Years)	6	China	2	Female	22	All ages	536	Gastroesophageal reflux disease	1	Number	2021	333821.724106562	598601.103611589	168006.10430354
2	DALYs (Disability-Adjusted Life Years)	6	China	3	Both	22	All ages	536	Gastroesophageal reflux disease	1	Number	2021	626247.519617705	1115891.98650853	311713.799876016
2	DALYs (Disability-Adjusted Life Years)	6	China	1	Male	22	All ages	536	Gastroesophageal reflux disease	3	Rate	2021	40.1626709739883	72.0733252783078	20.1218920015858
2	DALYs (Disability-Adjusted Life Years)	6	China	2	Female	22	All ages	536	Gastroesophageal reflux disease	3	Rate	2021	48.0566227623278	86.1739825302454	24.1859812985276
2	DALYs (Disability-Adjusted Life Years)	6	China	3	Both	22	All ages	536	Gastroesophageal reflux disease	3	Rate	2021	44.0168196129519	78.4322727659966	21.9093084925689
2	DALYs (Disability-Adjusted Life Years)	6	China	1	Male	27	Age-standardized	536	Gastroesophageal reflux disease	3	Rate	2021	32.7289044088311	58.4902551541256	16.5041722809054
2	DALYs (Disability-Adjusted Life Years)	6	China	2	Female	27	Age-standardized	536	Gastroesophageal reflux disease	3	Rate	2021	37.5629403353112	66.3907032950205	18.9126920767116
2	DALYs (Disability-Adjusted Life Years)	6	China	3	Both	27	Age-standardized	536	Gastroesophageal reflux disease	3	Rate	2021	35.1173276008108	62.3434505765581	17.634998060621
2	DALYs (Disability-Adjusted Life Years)	1	Global	1	Male	22	All ages	536	Gastroesophageal reflux disease	1	Number	2020	2978133.56787644	5306849.89031871	1496577.93883403
2	DALYs (Disability-Adjusted Life Years)	1	Global	2	Female	22	All ages	536	Gastroesophageal reflux disease	1	Number	2020	3265801.25666808	5777704.38389618	1651222.74179019
2	DALYs (Disability-Adjusted Life Years)	1	Global	3	Both	22	All ages	536	Gastroesophageal reflux disease	1	Number	2020	6243934.82454453	11080317.2682347	3147800.68062422
2	DALYs (Disability-Adjusted Life Years)	1	Global	1	Male	22	All ages	536	Gastroesophageal reflux disease	3	Rate	2020	75.8582711028352	135.174749052273	38.1204578045655
2	DALYs (Disability-Adjusted Life Years)	1	Global	2	Female	22	All ages	536	Gastroesophageal reflux disease	3	Rate	2020	83.8148808426517	148.281406742548	42.3776667564333
2	DALYs (Disability-Adjusted Life Years)	1	Global	3	Both	22	All ages	536	Gastroesophageal reflux disease	3	Rate	2020	79.8215868524318	141.649221529697	40.2410423047487
2	DALYs (Disability-Adjusted Life Years)	1	Global	1	Male	27	Age-standardized	536	Gastroesophageal reflux disease	3	Rate	2020	72.8462782555047	129.651055965383	36.6078808404255
2	DALYs (Disability-Adjusted Life Years)	1	Global	2	Female	27	Age-standardized	536	Gastroesophageal reflux disease	3	Rate	2020	78.0210529132236	137.757019444121	39.4670901839106
2	DALYs (Disability-Adjusted Life Years)	1	Global	3	Both	27	Age-standardized	536	Gastroesophageal reflux disease	3	Rate	2020	75.4492487518907	133.729487593273	38.0469585165125
2	DALYs (Disability-Adjusted Life Years)	1	Global	1	Male	22	All ages	536	Gastroesophageal reflux disease	1	Number	2021	3021198.75838081	5378421.50700719	1515880.05257247
2	DALYs (Disability-Adjusted Life Years)	1	Global	2	Female	22	All ages	536	Gastroesophageal reflux disease	1	Number	2021	3314962.94131307	5863205.12354904	1673913.88328006
2	DALYs (Disability-Adjusted Life Years)	1	Global	3	Both	22	All ages	536	Gastroesophageal reflux disease	1	Number	2021	6336161.69969388	11241352.5043173	3189793.93585253
2	DALYs (Disability-Adjusted Life Years)	1	Global	1	Male	22	All ages	536	Gastroesophageal reflux disease	3	Rate	2021	76.304624203095	135.83960034393	38.2856829355054
2	DALYs (Disability-Adjusted Life Years)	1	Global	2	Female	22	All ages	536	Gastroesophageal reflux disease	3	Rate	2021	84.3081153381814	149.116530880972	42.5719765910439
2	DALYs (Disability-Adjusted Life Years)	1	Global	3	Both	22	All ages	536	Gastroesophageal reflux disease	3	Rate	2021	80.2924600917374	142.451517197494	40.4213803930664
2	DALYs (Disability-Adjusted Life Years)	1	Global	1	Male	27	Age-standardized	536	Gastroesophageal reflux disease	3	Rate	2021	72.9510419412025	129.732141188101	36.6031938005236
2	DALYs (Disability-Adjusted Life Years)	1	Global	2	Female	27	Age-standardized	536	Gastroesophageal reflux disease	3	Rate	2021	78.1387754434958	137.950006527198	39.4795814270728
2	DALYs (Disability-Adjusted Life Years)	1	Global	3	Both	27	Age-standardized	536	Gastroesophageal reflux disease	3	Rate	2021	75.5613129047795	133.865474244291	38.0509446404262
2	DALYs (Disability-Adjusted Life Years)	6	China	1	Male	22	All ages	536	Gastroesophageal reflux disease	1	Number	2019	288264.51597293	518722.411138509	144450.85539567
2	DALYs (Disability-Adjusted Life Years)	6	China	2	Female	22	All ages	536	Gastroesophageal reflux disease	1	Number	2019	328864.238624926	592634.18352171	165482.924541414
2	DALYs (Disability-Adjusted Life Years)	6	China	3	Both	22	All ages	536	Gastroesophageal reflux disease	1	Number	2019	617128.754597856	1108003.60094988	307633.70392384
2	DALYs (Disability-Adjusted Life Years)	6	China	1	Male	22	All ages	536	Gastroesophageal reflux disease	3	Rate	2019	39.8448491018359	71.699481040168	19.9664621101408
2	DALYs (Disability-Adjusted Life Years)	6	China	2	Female	22	All ages	536	Gastroesophageal reflux disease	3	Rate	2019	47.5992416217277	85.7768476520726	23.9517125439125
2	DALYs (Disability-Adjusted Life Years)	6	China	3	Both	22	All ages	536	Gastroesophageal reflux disease	3	Rate	2019	43.6327747615269	78.3390357279827	21.7505861011289
2	DALYs (Disability-Adjusted Life Years)	6	China	1	Male	27	Age-standardized	536	Gastroesophageal reflux disease	3	Rate	2019	32.748370942346	58.3889479520126	16.4818399210775
2	DALYs (Disability-Adjusted Life Years)	6	China	2	Female	27	Age-standardized	536	Gastroesophageal reflux disease	3	Rate	2019	37.5826630850803	66.4525056070473	18.9291786401197
2	DALYs (Disability-Adjusted Life Years)	6	China	3	Both	27	Age-standardized	536	Gastroesophageal reflux disease	3	Rate	2019	35.1423153236508	62.4782585024356	17.6059988886364
2	DALYs (Disability-Adjusted Life Years)	6	China	1	Male	22	All ages	536	Gastroesophageal reflux disease	1	Number	2020	290360.593406258	521377.05634357	145145.547357662
2	DALYs (Disability-Adjusted Life Years)	6	China	2	Female	22	All ages	536	Gastroesophageal reflux disease	1	Number	2020	331350.932184559	595748.361120195	166489.637732995
2	DALYs (Disability-Adjusted Life Years)	6	China	3	Both	22	All ages	536	Gastroesophageal reflux disease	1	Number	2020	621711.525590817	1112298.16397033	309458.725071333
2	DALYs (Disability-Adjusted Life Years)	6	China	1	Male	22	All ages	536	Gastroesophageal reflux disease	3	Rate	2020	39.9777583670845	71.7848304831155	19.9840947845293
2	DALYs (Disability-Adjusted Life Years)	6	China	2	Female	22	All ages	536	Gastroesophageal reflux disease	3	Rate	2020	47.8016098468459	85.9443205347727	24.0182595956078
2	DALYs (Disability-Adjusted Life Years)	6	China	3	Both	22	All ages	536	Gastroesophageal reflux disease	3	Rate	2020	43.7983932016693	78.3592877689877	21.8007779532175
2	DALYs (Disability-Adjusted Life Years)	6	China	1	Male	27	Age-standardized	536	Gastroesophageal reflux disease	3	Rate	2020	32.735206622415	58.2864540375835	16.5139756092217
2	DALYs (Disability-Adjusted Life Years)	6	China	2	Female	27	Age-standardized	536	Gastroesophageal reflux disease	3	Rate	2020	37.5694611601802	66.3774955922866	18.898585479089
2	DALYs (Disability-Adjusted Life Years)	6	China	3	Both	27	Age-standardized	536	Gastroesophageal reflux disease	3	Rate	2020	35.1265192027147	62.3104380990455	17.6397212493713
2	DALYs (Disability-Adjusted Life Years)	6	China	1	Male	22	All ages	536	Gastroesophageal reflux disease	1	Number	2018	282256.187855001	508926.696832581	141467.276118935
2	DALYs (Disability-Adjusted Life Years)	6	China	2	Female	22	All ages	536	Gastroesophageal reflux disease	1	Number	2018	322075.631247654	579587.162577355	161310.097268983
2	DALYs (Disability-Adjusted Life Years)	6	China	3	Both	22	All ages	536	Gastroesophageal reflux disease	1	Number	2018	604331.819102654	1085337.41470954	301595.930330327
2	DALYs (Disability-Adjusted Life Years)	6	China	1	Male	22	All ages	536	Gastroesophageal reflux disease	3	Rate	2018	39.2302816228418	70.734809372474	19.6622831362448
2	DALYs (Disability-Adjusted Life Years)	6	China	2	Female	22	All ages	536	Gastroesophageal reflux disease	3	Rate	2018	46.8347047503638	84.280805509123	23.4569462755661
2	DALYs (Disability-Adjusted Life Years)	6	China	3	Both	22	All ages	536	Gastroesophageal reflux disease	3	Rate	2018	42.9465697145125	77.129016661415	21.4327795395206
2	DALYs (Disability-Adjusted Life Years)	6	China	1	Male	27	Age-standardized	536	Gastroesophageal reflux disease	3	Rate	2018	32.3546921652448	57.6412861029378	16.285455681047
2	DALYs (Disability-Adjusted Life Years)	6	China	2	Female	27	Age-standardized	536	Gastroesophageal reflux disease	3	Rate	2018	37.1304853879236	65.7331	18.6247536151722
2	DALYs (Disability-Adjusted Life Years)	6	China	3	Both	27	Age-standardized	536	Gastroesophageal reflux disease	3	Rate	2018	34.7223359867082	61.7856311158496	17.4066485028034
5	Prevalence	1	Global	1	Male	22	All ages	536	Gastroesophageal reflux disease	1	Number	1990	213849926.472637	243830025.550234	187550433.386262
5	Prevalence	1	Global	2	Female	22	All ages	536	Gastroesophageal reflux disease	1	Number	1990	236915528.213711	268133767.678044	209576160.596377
5	Prevalence	1	Global	3	Both	22	All ages	536	Gastroesophageal reflux disease	1	Number	1990	450765454.686348	511638409.849193	397478515.382597
5	Prevalence	1	Global	1	Male	22	All ages	536	Gastroesophageal reflux disease	3	Rate	1990	7962.41210147753	9078.6804473986	6983.18612993869
5	Prevalence	1	Global	2	Female	22	All ages	536	Gastroesophageal reflux disease	3	Rate	1990	8947.36510183112	10126.3548811411	7914.86501384698
5	Prevalence	1	Global	3	Both	22	All ages	536	Gastroesophageal reflux disease	3	Rate	1990	8451.3925846245	9592.6984156701	7452.31681471569
5	Prevalence	1	Global	1	Male	22	All ages	536	Gastroesophageal reflux disease	1	Number	1991	218033512.846893	248600459.989283	1.91261e+08
5	Prevalence	1	Global	2	Female	22	All ages	536	Gastroesophageal reflux disease	1	Number	1991	241519734.977883	273447121.059597	213628665.462269
5	Prevalence	1	Global	3	Both	22	All ages	536	Gastroesophageal reflux disease	1	Number	1991	459553247.824776	521601737.17403	405624408.265944
5	Prevalence	1	Global	1	Male	22	All ages	536	Gastroesophageal reflux disease	3	Rate	1991	7990.76038498293	9111.01546469997	7009.58586900889
5	Prevalence	1	Global	2	Female	22	All ages	536	Gastroesophageal reflux disease	3	Rate	1991	8985.29755191269	10173.097232238	7947.66160608897
5	Prevalence	1	Global	3	Both	22	All ages	536	Gastroesophageal reflux disease	3	Rate	1991	8484.29919944623	9629.84207397609	7488.66177883873
5	Prevalence	1	Global	1	Male	22	All ages	536	Gastroesophageal reflux disease	1	Number	1992	222295344.961733	253489759.960972	194996075.474844
5	Prevalence	1	Global	2	Female	22	All ages	536	Gastroesophageal reflux disease	1	Number	1992	246220518.543742	278829941.139132	217952571.492511
5	Prevalence	1	Global	3	Both	22	All ages	536	Gastroesophageal reflux disease	1	Number	1992	468515863.505475	531817636.232104	414036024.168035
5	Prevalence	1	Global	1	Male	22	All ages	536	Gastroesophageal reflux disease	3	Rate	1992	8024.69268800676	9150.78731672751	7039.20984635267
5	Prevalence	1	Global	2	Female	22	All ages	536	Gastroesophageal reflux disease	3	Rate	1992	9028.76964815149	10224.5390613358	7992.19973163428
5	Prevalence	1	Global	3	Both	22	All ages	536	Gastroesophageal reflux disease	3	Rate	1992	8522.79725956043	9674.32321021485	7531.75157343925
5	Prevalence	1	Global	1	Male	22	All ages	536	Gastroesophageal reflux disease	1	Number	1993	226610590.552338	258191573.324671	198750263.756605
5	Prevalence	1	Global	2	Female	22	All ages	536	Gastroesophageal reflux disease	1	Number	1993	251002961.755894	284200238.032598	222340053.525285
5	Prevalence	1	Global	3	Both	22	All ages	536	Gastroesophageal reflux disease	1	Number	1993	477613552.308231	542157349.292494	422249055.02367
5	Prevalence	1	Global	1	Male	22	All ages	536	Gastroesophageal reflux disease	3	Rate	1993	8063.83345373217	9187.62817471396	7072.4365613815
5	Prevalence	1	Global	2	Female	22	All ages	536	Gastroesophageal reflux disease	3	Rate	1993	9077.01450548586	10277.5268667676	8040.47839468223
5	Prevalence	1	Global	3	Both	22	All ages	536	Gastroesophageal reflux disease	3	Rate	1993	8566.3397764851	9723.9788190951	7573.33802223888
5	Prevalence	1	Global	1	Male	22	All ages	536	Gastroesophageal reflux disease	1	Number	1994	230952533.556891	262936076.260583	202502164.459767
5	Prevalence	1	Global	2	Female	22	All ages	536	Gastroesophageal reflux disease	1	Number	1994	255846131.857148	289556517.166003	227003943.223626
5	Prevalence	1	Global	3	Both	22	All ages	536	Gastroesophageal reflux disease	1	Number	1994	486798665.414039	552350673.518689	430234422.400989
5	Prevalence	1	Global	1	Male	22	All ages	536	Gastroesophageal reflux disease	3	Rate	1994	8108.55459698671	9231.47062749678	7109.68540263069
5	Prevalence	1	Global	2	Female	22	All ages	536	Gastroesophageal reflux disease	3	Rate	1994	9130.1836282998	10333.1801552218	8100.91468233367
5	Prevalence	1	Global	3	Both	22	All ages	536	Gastroesophageal reflux disease	3	Rate	1994	8615.20551226547	9775.3237740584	7614.14981341987
5	Prevalence	1	Global	1	Male	22	All ages	536	Gastroesophageal reflux disease	1	Number	1995	235423620.082155	267906719.348387	206350628.425187
5	Prevalence	1	Global	2	Female	22	All ages	536	Gastroesophageal reflux disease	1	Number	1995	260814816.702325	295113675.763139	231733203.424489
5	Prevalence	1	Global	3	Both	22	All ages	536	Gastroesophageal reflux disease	1	Number	1995	496238436.784481	562777516.023563	438406956.128058
5	Prevalence	1	Global	1	Male	22	All ages	536	Gastroesophageal reflux disease	3	Rate	1995	8159.08146712607	9284.84893738009	7151.49816966634
5	Prevalence	1	Global	2	Female	22	All ages	536	Gastroesophageal reflux disease	3	Rate	1995	9188.01032241588	10396.2939432714	8163.52035529015
5	Prevalence	1	Global	3	Both	22	All ages	536	Gastroesophageal reflux disease	3	Rate	1995	8669.34186221877	9831.78713521842	7659.01932562217
5	Prevalence	1	Global	1	Male	22	All ages	536	Gastroesophageal reflux disease	1	Number	1996	240163992.847099	273180430.095407	210631008.267494
5	Prevalence	1	Global	2	Female	22	All ages	536	Gastroesophageal reflux disease	1	Number	1996	266136596.742121	300973194.958964	236383367.751342
5	Prevalence	1	Global	3	Both	22	All ages	536	Gastroesophageal reflux disease	1	Number	1996	506300589.58922	573693095.361932	447890970.233611
5	Prevalence	1	Global	1	Male	22	All ages	536	Gastroesophageal reflux disease	3	Rate	1996	8216.9566578483	9346.57909062753	7206.51686880795
5	Prevalence	1	Global	2	Female	22	All ages	536	Gastroesophageal reflux disease	3	Rate	1996	9254.96429970272	10466.4153995015	8220.28859000554
5	Prevalence	1	Global	3	Both	22	All ages	536	Gastroesophageal reflux disease	3	Rate	1996	8731.73783247747	9893.99935138758	7724.3965542029
5	Prevalence	1	Global	1	Male	22	All ages	536	Gastroesophageal reflux disease	1	Number	1997	245150180.081961	278702631.084892	215187755.710061
5	Prevalence	1	Global	2	Female	22	All ages	536	Gastroesophageal reflux disease	1	Number	1997	271853151.010512	307067771.555793	241819497.089771
5	Prevalence	1	Global	3	Both	22	All ages	536	Gastroesophageal reflux disease	1	Number	1997	517003331.092473	585333578.017628	4.58127e+08
5	Prevalence	1	Global	1	Male	22	All ages	536	Gastroesophageal reflux disease	3	Rate	1997	8281.83023133419	9415.32196672078	7269.61921894865
5	Prevalence	1	Global	2	Female	22	All ages	536	Gastroesophageal reflux disease	3	Rate	1997	9332.47664980477	10541.3632223862	8301.44804895258
5	Prevalence	1	Global	3	Both	22	All ages	536	Gastroesophageal reflux disease	3	Rate	1997	8802.93901744806	9966.38799457222	7800.46546128144
5	Prevalence	1	Global	1	Male	22	All ages	536	Gastroesophageal reflux disease	1	Number	1998	250273959.387554	284365595.369514	219885444.905652
5	Prevalence	1	Global	2	Female	22	All ages	536	Gastroesophageal reflux disease	1	Number	1998	277781548.852994	313511171.802391	247559573.686507
5	Prevalence	1	Global	3	Both	22	All ages	536	Gastroesophageal reflux disease	1	Number	1998	528055508.240547	597313713.018982	468656647.635077
5	Prevalence	1	Global	1	Male	22	All ages	536	Gastroesophageal reflux disease	3	Rate	1998	8349.83560025221	9487.22742675143	7335.99020986203
5	Prevalence	1	Global	2	Female	22	All ages	536	Gastroesophageal reflux disease	3	Rate	1998	9414.63151923602	10625.5875232571	8390.34188894618
5	Prevalence	1	Global	3	Both	22	All ages	536	Gastroesophageal reflux disease	3	Rate	1998	8878.04252446058	10042.4604267366	7879.38688669069
5	Prevalence	1	Global	1	Male	22	All ages	536	Gastroesophageal reflux disease	1	Number	1999	255449113.209409	290101482.009409	224635590.699148
5	Prevalence	1	Global	2	Female	22	All ages	536	Gastroesophageal reflux disease	1	Number	1999	283773618.459025	320335652.248609	253289584.392991
5	Prevalence	1	Global	3	Both	22	All ages	536	Gastroesophageal reflux disease	1	Number	1999	539222731.668433	609772119.430057	479125533.682801
5	Prevalence	1	Global	1	Male	22	All ages	536	Gastroesophageal reflux disease	3	Rate	1999	8417.90206902971	9559.81343976591	7402.49351413454
5	Prevalence	1	Global	2	Female	22	All ages	536	Gastroesophageal reflux disease	3	Rate	1999	9496.18615094367	10719.6962179061	8476.06996221991
5	Prevalence	1	Global	3	Both	22	All ages	536	Gastroesophageal reflux disease	3	Rate	1999	8952.89925536082	10124.2548456618	7955.08494321183
5	Prevalence	1	Global	1	Male	22	All ages	536	Gastroesophageal reflux disease	1	Number	2000	260589937.974539	295773878.495691	229337902.294419
5	Prevalence	1	Global	2	Female	22	All ages	536	Gastroesophageal reflux disease	1	Number	2000	289693102.648586	326936190.996322	258907378.562874
5	Prevalence	1	Global	3	Both	22	All ages	536	Gastroesophageal reflux disease	1	Number	2000	550283040.623125	621943614.165269	489367164.611968
5	Prevalence	1	Global	1	Male	22	All ages	536	Gastroesophageal reflux disease	3	Rate	2000	8482.22341277215	9627.46350286058	7464.96714108675
5	Prevalence	1	Global	2	Female	22	All ages	536	Gastroesophageal reflux disease	3	Rate	2000	9571.6	10802.1336859006	8554.42802761991
5	Prevalence	1	Global	3	Both	22	All ages	536	Gastroesophageal reflux disease	3	Rate	2000	9022.84090625043	10197.8397824456	8024.01990444171
5	Prevalence	1	Global	1	Male	22	All ages	536	Gastroesophageal reflux disease	1	Number	2001	265602876.114017	301063905.884878	233836070.595675
5	Prevalence	1	Global	2	Female	22	All ages	536	Gastroesophageal reflux disease	1	Number	2001	295146244.812144	332675586.457932	263458444.325316
5	Prevalence	1	Global	3	Both	22	All ages	536	Gastroesophageal reflux disease	1	Number	2001	560749120.926161	633625589.306623	498118551.074003
5	Prevalence	1	Global	1	Male	22	All ages	536	Gastroesophageal reflux disease	3	Rate	2001	8538.9605236335	9679.00967434673	7517.67829110745
5	Prevalence	1	Global	2	Female	22	All ages	536	Gastroesophageal reflux disease	3	Rate	2001	9627.3048490249	10851.4654784009	8593.6880551675
5	Prevalence	1	Global	3	Both	22	All ages	536	Gastroesophageal reflux disease	3	Rate	2001	9079.18878542362	10259.1446511561	8065.1260857136
5	Prevalence	1	Global	1	Male	22	All ages	536	Gastroesophageal reflux disease	1	Number	2002	270534843.98781	306217238.401866	238068902.051266
5	Prevalence	1	Global	2	Female	22	All ages	536	Gastroesophageal reflux disease	1	Number	2002	300046389.268599	337614091.16275	267392531.772049
5	Prevalence	1	Global	3	Both	22	All ages	536	Gastroesophageal reflux disease	1	Number	2002	570581233.256409	644198479.237116	505862958.426525
5	Prevalence	1	Global	1	Male	22	All ages	536	Gastroesophageal reflux disease	3	Rate	2002	8589.45039223253	9722.36233872256	7558.66044447403
5	Prevalence	1	Global	2	Female	22	All ages	536	Gastroesophageal reflux disease	3	Rate	2002	9660.96083293479	10870.5741112931	8609.56461687837
5	Prevalence	1	Global	3	Both	22	All ages	536	Gastroesophageal reflux disease	3	Rate	2002	9121.44944971162	10298.3125302018	8086.84747206814
5	Prevalence	1	Global	1	Male	22	All ages	536	Gastroesophageal reflux disease	1	Number	2003	275478503.932144	311422355.85207	242335021.21005
5	Prevalence	1	Global	2	Female	22	All ages	536	Gastroesophageal reflux disease	1	Number	2003	3.04733e+08	342800099.177766	271128999.282756
5	Prevalence	1	Global	3	Both	22	All ages	536	Gastroesophageal reflux disease	1	Number	2003	580211914.987143	654325520.747784	513318193.710995
5	Prevalence	1	Global	1	Male	22	All ages	536	Gastroesophageal reflux disease	3	Rate	2003	8637.15137571632	9764.10859970071	7597.99487782973
5	Prevalence	1	Global	2	Female	22	All ages	536	Gastroesophageal reflux disease	3	Rate	2003	9684.34792860924	10894.0972993607	8616.40853065484
5	Prevalence	1	Global	3	Both	22	All ages	536	Gastroesophageal reflux disease	3	Rate	2003	9157.21269287772	10326.912993502	8101.46044491268
5	Prevalence	1	Global	1	Male	22	All ages	536	Gastroesophageal reflux disease	1	Number	2004	280575410.906377	316909625.033963	246654643.189896
5	Prevalence	1	Global	2	Female	22	All ages	536	Gastroesophageal reflux disease	1	Number	2004	309635883.977338	348248954.835956	275242173.970902
5	Prevalence	1	Global	3	Both	22	All ages	536	Gastroesophageal reflux disease	1	Number	2004	590211294.883715	664825940.589284	521805872.27445
5	Prevalence	1	Global	1	Male	22	All ages	536	Gastroesophageal reflux disease	3	Rate	2004	8686.62430239156	9811.53281247589	7636.43617560635
5	Prevalence	1	Global	2	Female	22	All ages	536	Gastroesophageal reflux disease	3	Rate	2004	9711.32120693907	10922.3692582101	8632.60784503667
5	Prevalence	1	Global	3	Both	22	All ages	536	Gastroesophageal reflux disease	3	Rate	2004	9195.65446675041	10358.1711891771	8129.87914963999
5	Prevalence	1	Global	1	Male	22	All ages	536	Gastroesophageal reflux disease	1	Number	2005	285945586.567843	322754039.261481	250932259.513083
5	Prevalence	1	Global	2	Female	22	All ages	536	Gastroesophageal reflux disease	1	Number	2005	315154726.067509	354363299.058916	279956409.242305
5	Prevalence	1	Global	3	Both	22	All ages	536	Gastroesophageal reflux disease	1	Number	2005	601100312.635353	676287291.55755	531321391.07605
5	Prevalence	1	Global	1	Male	22	All ages	536	Gastroesophageal reflux disease	3	Rate	2005	8741.10488731088	9866.30688674221	7670.77829856052
5	Prevalence	1	Global	2	Female	22	All ages	536	Gastroesophageal reflux disease	3	Rate	2005	9753.87273095192	10967.357407804	8664.5033696204
5	Prevalence	1	Global	3	Both	22	All ages	536	Gastroesophageal reflux disease	3	Rate	2005	9244.35796985511	10400.6630544116	8171.22372572778
5	Prevalence	1	Global	1	Male	22	All ages	536	Gastroesophageal reflux disease	1	Number	2006	291297864.926975	328749128.875072	255838197.66429
5	Prevalence	1	Global	2	Female	22	All ages	536	Gastroesophageal reflux disease	1	Number	2006	320976889.977501	360613618.332408	285294980.548229
5	Prevalence	1	Global	3	Both	22	All ages	536	Gastroesophageal reflux disease	1	Number	2006	612274754.904476	688771429.508374	541386607.411918
5	Prevalence	1	Global	1	Male	22	All ages	536	Gastroesophageal reflux disease	3	Rate	2006	8790.34732956224	9920.49505006618	7720.29900803455
5	Prevalence	1	Global	2	Female	22	All ages	536	Gastroesophageal reflux disease	3	Rate	2006	9801.1749406624	11011.5004214445	8711.61164980467
5	Prevalence	1	Global	3	Both	22	All ages	536	Gastroesophageal reflux disease	3	Rate	2006	9292.77284685398	10453.7977216173	8216.87114274827
5	Prevalence	1	Global	1	Male	22	All ages	536	Gastroesophageal reflux disease	1	Number	2007	296380901.747642	334359847.034344	260521963.040516
5	Prevalence	1	Global	2	Female	22	All ages	536	Gastroesophageal reflux disease	1	Number	2007	326643102.19141	366651310.590516	2.90547e+08
5	Prevalence	1	Global	3	Both	22	All ages	536	Gastroesophageal reflux disease	1	Number	2007	623024003.939051	700667986.408476	551110778.009894
5	Prevalence	1	Global	1	Male	22	All ages	536	Gastroesophageal reflux disease	3	Rate	2007	8827.05144630888	9958.17056344998	7759.07204915007
5	Prevalence	1	Global	2	Female	22	All ages	536	Gastroesophageal reflux disease	3	Rate	2007	9839.4130148431	11044.5732762468	8752.10133284509
5	Prevalence	1	Global	3	Both	22	All ages	536	Gastroesophageal reflux disease	3	Rate	2007	9330.35909449991	10493.1493455761	8253.39220827931
5	Prevalence	1	Global	1	Male	22	All ages	536	Gastroesophageal reflux disease	1	Number	2008	301503548.219807	340021959.671774	265147584.046903
5	Prevalence	1	Global	2	Female	22	All ages	536	Gastroesophageal reflux disease	1	Number	2008	332432869.411966	372793411.98028	295728432.576713
5	Prevalence	1	Global	3	Both	22	All ages	536	Gastroesophageal reflux disease	1	Number	2008	633936417.631773	712735443.084207	560994779.449094
5	Prevalence	1	Global	1	Male	22	All ages	536	Gastroesophageal reflux disease	3	Rate	2008	8860.29175772824	9992.23320758422	7791.89819616855
5	Prevalence	1	Global	2	Female	22	All ages	536	Gastroesophageal reflux disease	3	Rate	2008	9877.1461712683	11076.3265627984	8786.59490178294
5	Prevalence	1	Global	3	Both	22	All ages	536	Gastroesophageal reflux disease	3	Rate	2008	9365.92575235666	10530.1210899627	8288.26883208322
5	Prevalence	1	Global	1	Male	22	All ages	536	Gastroesophageal reflux disease	1	Number	2009	306940400.928228	346049376.130801	270002907.210685
5	Prevalence	1	Global	2	Female	22	All ages	536	Gastroesophageal reflux disease	1	Number	2009	338641546.741703	379388477.387845	301214687.14471
5	Prevalence	1	Global	3	Both	22	All ages	536	Gastroesophageal reflux disease	1	Number	2009	645581947.669932	725579653.007026	571543174.521656
5	Prevalence	1	Global	1	Male	22	All ages	536	Gastroesophageal reflux disease	3	Rate	2009	8900.1547249011	10034.1726951083	7829.10181612137
5	Prevalence	1	Global	2	Female	22	All ages	536	Gastroesophageal reflux disease	3	Rate	2009	9923.98810294401	11118.1	8827.1831983337
5	Prevalence	1	Global	3	Both	22	All ages	536	Gastroesophageal reflux disease	3	Rate	2009	9409.35888572593	10575.3256886517	8330.24353789848
5	Prevalence	1	Global	1	Male	22	All ages	536	Gastroesophageal reflux disease	1	Number	2010	312896157.773467	352729142.703827	275313544.105044
5	Prevalence	1	Global	2	Female	22	All ages	536	Gastroesophageal reflux disease	1	Number	2010	345508901.867702	386874888.464403	307263764.918049
5	Prevalence	1	Global	3	Both	22	All ages	536	Gastroesophageal reflux disease	1	Number	2010	658405059.641169	739788559.946055	583145798.930716
5	Prevalence	1	Global	1	Male	22	All ages	536	Gastroesophageal reflux disease	3	Rate	2010	8958.61437362514	10099.0833198749	7882.57641456494
5	Prevalence	1	Global	2	Female	22	All ages	536	Gastroesophageal reflux disease	3	Rate	2010	9991.37605864201	11187.5916290375	8885.40876340697
5	Prevalence	1	Global	3	Both	22	All ages	536	Gastroesophageal reflux disease	3	Rate	2010	9472.42373290784	10643.2819887287	8389.67444835143
5	Prevalence	1	Global	1	Male	22	All ages	536	Gastroesophageal reflux disease	1	Number	2011	319377596.048368	359993072.747555	280828916.397551
5	Prevalence	1	Global	2	Female	22	All ages	536	Gastroesophageal reflux disease	1	Number	2011	352914366.19171	395033803.188096	313882937.114809
5	Prevalence	1	Global	3	Both	22	All ages	536	Gastroesophageal reflux disease	1	Number	2011	672291962.240077	755422030.44045	595489024.220961
5	Prevalence	1	Global	1	Male	22	All ages	536	Gastroesophageal reflux disease	3	Rate	2011	9034.19190762988	10183.0765365466	7943.77049404243
5	Prevalence	1	Global	2	Female	22	All ages	536	Gastroesophageal reflux disease	3	Rate	2011	10075.6819092734	11278.1890612286	8961.33718002086
5	Prevalence	1	Global	3	Both	22	All ages	536	Gastroesophageal reflux disease	3	Rate	2011	9552.52666793037	10733.7131731877	8461.24169828941
5	Prevalence	1	Global	1	Male	22	All ages	536	Gastroesophageal reflux disease	1	Number	2012	326167512.337286	367668522.653811	286574202.103166
5	Prevalence	1	Global	2	Female	22	All ages	536	Gastroesophageal reflux disease	1	Number	2012	360552176.14915	403429880.125287	320700460.318217
5	Prevalence	1	Global	3	Both	22	All ages	536	Gastroesophageal reflux disease	1	Number	2012	686719688.486438	771616163.207463	608457285.891944
5	Prevalence	1	Global	1	Male	22	All ages	536	Gastroesophageal reflux disease	3	Rate	2012	9114.21466634835	10273.892140615	8007.84473318364
5	Prevalence	1	Global	2	Female	22	All ages	536	Gastroesophageal reflux disease	3	Rate	2012	10163.0888892212	11371.7070746096	9039.76594965807
5	Prevalence	1	Global	3	Both	22	All ages	536	Gastroesophageal reflux disease	3	Rate	2012	9636.37007476998	10827.6768949636	8538.1556402845
5	Prevalence	1	Global	1	Male	22	All ages	536	Gastroesophageal reflux disease	1	Number	2013	333157134.723041	375586544.411472	292687955.404455
5	Prevalence	1	Global	2	Female	22	All ages	536	Gastroesophageal reflux disease	1	Number	2013	368329542.163996	412199958.649593	327599459.378603
5	Prevalence	1	Global	3	Both	22	All ages	536	Gastroesophageal reflux disease	1	Number	2013	701486676.887037	788259828.323488	621524371.684771
5	Prevalence	1	Global	1	Male	22	All ages	536	Gastroesophageal reflux disease	3	Rate	2013	9195.39623026505	10366.4809624762	8078.41538200136
5	Prevalence	1	Global	2	Female	22	All ages	536	Gastroesophageal reflux disease	3	Rate	2013	10250.9321465648	11471.8840691102	9117.37844760267
5	Prevalence	1	Global	3	Both	22	All ages	536	Gastroesophageal reflux disease	3	Rate	2013	9720.97345842549	10923.4474751252	8612.88192631658
5	Prevalence	1	Global	1	Male	22	All ages	536	Gastroesophageal reflux disease	1	Number	2014	340232768.191346	383423528.999208	298859180.860705
5	Prevalence	1	Global	2	Female	22	All ages	536	Gastroesophageal reflux disease	1	Number	2014	376183155.983715	421051651.631567	334417137.985246
5	Prevalence	1	Global	3	Both	22	All ages	536	Gastroesophageal reflux disease	1	Number	2014	716415924.175061	805206412.327282	634453982.61521
5	Prevalence	1	Global	1	Male	22	All ages	536	Gastroesophageal reflux disease	3	Rate	2014	9276.43297869765	10454	8148.38375521681
5	Prevalence	1	Global	2	Female	22	All ages	536	Gastroesophageal reflux disease	3	Rate	2014	10339.2101117063	11572.3987766432	9191.29152804121
5	Prevalence	1	Global	3	Both	22	All ages	536	Gastroesophageal reflux disease	3	Rate	2014	9805.69062657485	11020.9791594279	8683.86542005847
5	Prevalence	1	Global	1	Male	22	All ages	536	Gastroesophageal reflux disease	1	Number	2015	347311285.271273	391260563.039695	305045696.235292
5	Prevalence	1	Global	2	Female	22	All ages	536	Gastroesophageal reflux disease	1	Number	2015	384040252.892384	429810933.775918	341251109.621371
5	Prevalence	1	Global	3	Both	22	All ages	536	Gastroesophageal reflux disease	1	Number	2015	731351538.163657	822132106.749848	647242781.652516
5	Prevalence	1	Global	1	Male	22	All ages	536	Gastroesophageal reflux disease	3	Rate	2015	9354.47967731722	10538.2092108864	8216.09860404427
5	Prevalence	1	Global	2	Female	22	All ages	536	Gastroesophageal reflux disease	3	Rate	2015	10425.5904640132	11668.1330635372	9263.98805205306
5	Prevalence	1	Global	3	Both	22	All ages	536	Gastroesophageal reflux disease	3	Rate	2015	9887.92441813848	11115.2841131352	8750.76809332376
5	Prevalence	1	Global	1	Male	22	All ages	536	Gastroesophageal reflux disease	1	Number	2016	354900336.169789	399682772.265115	312263103.458673
5	Prevalence	1	Global	2	Female	22	All ages	536	Gastroesophageal reflux disease	1	Number	2016	392736628.160762	439523957.590293	348871218.02637
5	Prevalence	1	Global	3	Both	22	All ages	536	Gastroesophageal reflux disease	1	Number	2016	747636964.33055	839775037.717724	662004271.217198
5	Prevalence	1	Global	1	Male	22	All ages	536	Gastroesophageal reflux disease	3	Rate	2016	9443.89095232086	10635.550694399	8309.31503002624
5	Prevalence	1	Global	2	Female	22	All ages	536	Gastroesophageal reflux disease	3	Rate	2016	10533.0191206162	11787.8341802446	9356.56861778686
5	Prevalence	1	Global	3	Both	22	All ages	536	Gastroesophageal reflux disease	3	Rate	2016	9986.31907491185	11217.0236062426	8842.50805770289
5	Prevalence	1	Global	1	Male	22	All ages	536	Gastroesophageal reflux disease	1	Number	2017	363132485.759797	409377203.88378	319439360.01023
5	Prevalence	1	Global	2	Female	22	All ages	536	Gastroesophageal reflux disease	1	Number	2017	402460764.427831	450612908.143742	357317304.086299
5	Prevalence	1	Global	3	Both	22	All ages	536	Gastroesophageal reflux disease	1	Number	2017	765593250.187629	859413567.879736	677315135.187183
5	Prevalence	1	Global	1	Male	22	All ages	536	Gastroesophageal reflux disease	3	Rate	2017	9549.51589824644	10765.6413848189	8400.49118866544
5	Prevalence	1	Global	2	Female	22	All ages	536	Gastroesophageal reflux disease	3	Rate	2017	10667.0684186112	11943.3225455213	9470.5582922127
5	Prevalence	1	Global	3	Both	22	All ages	536	Gastroesophageal reflux disease	3	Rate	2017	10106.1015025397	11344.5628570051	8940.79918250389
5	Prevalence	1	Global	1	Male	22	All ages	536	Gastroesophageal reflux disease	1	Number	2018	371299505.631134	418139378.089395	327031526.963835
5	Prevalence	1	Global	2	Female	22	All ages	536	Gastroesophageal reflux disease	1	Number	2018	412120299.902542	461003396.887056	366191179.314523
5	Prevalence	1	Global	3	Both	22	All ages	536	Gastroesophageal reflux disease	1	Number	2018	783419805.533675	878948590.498503	694022070.138865
5	Prevalence	1	Global	1	Male	22	All ages	536	Gastroesophageal reflux disease	3	Rate	2018	9654.10557814916	10871.9824326051	8503.10016795094
5	Prevalence	1	Global	2	Female	22	All ages	536	Gastroesophageal reflux disease	3	Rate	2018	10799.7979193638	12080.8014739819	9596.20464555035
5	Prevalence	1	Global	3	Both	22	All ages	536	Gastroesophageal reflux disease	3	Rate	2018	10224.706809806	11471.4889453394	9057.9433103182
5	Prevalence	1	Global	1	Male	22	All ages	536	Gastroesophageal reflux disease	1	Number	2019	378684452.452499	425911308.534808	333910363.892303
5	Prevalence	1	Global	2	Female	22	All ages	536	Gastroesophageal reflux disease	1	Number	2019	420593635.06524	470674250.655031	374379604.862509
5	Prevalence	1	Global	3	Both	22	All ages	536	Gastroesophageal reflux disease	1	Number	2019	799278087.51774	897092956.674361	709211440.142981
5	Prevalence	1	Global	1	Male	22	All ages	536	Gastroesophageal reflux disease	3	Rate	2019	9740.42696344731	10955.184367412	8588.75903345693
5	Prevalence	1	Global	2	Female	22	All ages	536	Gastroesophageal reflux disease	3	Rate	2019	10903.077184212	12201.3203616762	9705.06776066057
5	Prevalence	1	Global	3	Both	22	All ages	536	Gastroesophageal reflux disease	3	Rate	2019	10319.4860056341	11582.374591182	9156.63477566399
5	Prevalence	1	Global	1	Male	22	All ages	536	Gastroesophageal reflux disease	1	Number	2020	385072730.958433	432877708.530783	339589163.369868
5	Prevalence	1	Global	2	Female	22	All ages	536	Gastroesophageal reflux disease	1	Number	2020	427867523.767727	478566443.871044	380923295.273531
5	Prevalence	1	Global	3	Both	22	All ages	536	Gastroesophageal reflux disease	1	Number	2020	812940254.72616	912075716.341458	721500289.872729
5	Prevalence	1	Global	1	Male	22	All ages	536	Gastroesophageal reflux disease	3	Rate	2020	9808.47599799991	11026.1523936674	8649.9299750565
5	Prevalence	1	Global	2	Female	22	All ages	536	Gastroesophageal reflux disease	3	Rate	2020	10980.9699680317	12282.1281259675	9776.1737761454
5	Prevalence	1	Global	3	Both	22	All ages	536	Gastroesophageal reflux disease	3	Rate	2020	10392.5141712535	11659.8480051006	9223.5584884299
5	Prevalence	1	Global	1	Male	22	All ages	536	Gastroesophageal reflux disease	1	Number	2021	390850461.735595	439258613.848376	344738586.737689
5	Prevalence	1	Global	2	Female	22	All ages	536	Gastroesophageal reflux disease	1	Number	2021	4.34753e+08	486018856.959404	387112710.300245
5	Prevalence	1	Global	3	Both	22	All ages	536	Gastroesophageal reflux disease	1	Number	2021	825603654.108194	925555127.87604	732989499.881576
5	Prevalence	1	Global	1	Male	22	All ages	536	Gastroesophageal reflux disease	3	Rate	2021	9871.47817389031	11094.0941454763	8706.85791073985
5	Prevalence	1	Global	2	Female	22	All ages	536	Gastroesophageal reflux disease	3	Rate	2021	11056.9025763145	12360.721544849	9845.28141238935
5	Prevalence	1	Global	3	Both	22	All ages	536	Gastroesophageal reflux disease	3	Rate	2021	10462.1301650615	11728.7250057523	9288.51455444189
5	Prevalence	1	Global	1	Male	27	Age-standardized	536	Gastroesophageal reflux disease	3	Rate	1990	9130.43117436798	10231.2865521743	8056.66526194338
5	Prevalence	1	Global	2	Female	27	Age-standardized	536	Gastroesophageal reflux disease	3	Rate	1990	9898.36292694048	11093.7340807911	8782.84421523369
5	Prevalence	1	Global	3	Both	27	Age-standardized	536	Gastroesophageal reflux disease	3	Rate	1990	9516.49130160769	10664.7218932986	8427.32574523799
5	Prevalence	1	Global	1	Male	27	Age-standardized	536	Gastroesophageal reflux disease	3	Rate	1991	9107.67479235392	10207.8543158251	8036.81391250174
5	Prevalence	1	Global	2	Female	27	Age-standardized	536	Gastroesophageal reflux disease	3	Rate	1991	9882.11322593888	11078.1139906295	8771.97094719282
5	Prevalence	1	Global	3	Both	27	Age-standardized	536	Gastroesophageal reflux disease	3	Rate	1991	9496.71056380454	10638.2900302527	8411.59171600982
5	Prevalence	1	Global	1	Male	27	Age-standardized	536	Gastroesophageal reflux disease	3	Rate	1992	9090.12183469052	10185.5791234148	8021.24203934129
5	Prevalence	1	Global	2	Female	27	Age-standardized	536	Gastroesophageal reflux disease	3	Rate	1992	9869.65461093847	11063.3108425304	8762.17161582246
5	Prevalence	1	Global	3	Both	27	Age-standardized	536	Gastroesophageal reflux disease	3	Rate	1992	9481.45901496402	10616.6182760436	8402.51752788916
5	Prevalence	1	Global	1	Male	27	Age-standardized	536	Gastroesophageal reflux disease	3	Rate	1993	9077.83837538669	10176.2153146886	8016.84958883314
5	Prevalence	1	Global	2	Female	27	Age-standardized	536	Gastroesophageal reflux disease	3	Rate	1993	9860.78858657222	11051.2922081713	8754.76684219525
5	Prevalence	1	Global	3	Both	27	Age-standardized	536	Gastroesophageal reflux disease	3	Rate	1993	9470.68375522815	10594.8881065271	8397.25437956936
5	Prevalence	1	Global	1	Male	27	Age-standardized	536	Gastroesophageal reflux disease	3	Rate	1994	9070.72619447244	10171.1870683105	8010.4600903023
5	Prevalence	1	Global	2	Female	27	Age-standardized	536	Gastroesophageal reflux disease	3	Rate	1994	9855.36984919724	11047.3647165469	8750.32457960049
5	Prevalence	1	Global	3	Both	27	Age-standardized	536	Gastroesophageal reflux disease	3	Rate	1994	9464.3076573793	10577.9716950024	8395.5413692323
5	Prevalence	1	Global	1	Male	27	Age-standardized	536	Gastroesophageal reflux disease	3	Rate	1995	9071.48854657447	10168.9737186367	8010.49369068386
5	Prevalence	1	Global	2	Female	27	Age-standardized	536	Gastroesophageal reflux disease	3	Rate	1995	9855.82019874799	11056.3108431265	8750.50026115796
5	Prevalence	1	Global	3	Both	27	Age-standardized	536	Gastroesophageal reflux disease	3	Rate	1995	9464.8730012891	10577.5156269009	8399.80963028787
5	Prevalence	1	Global	1	Male	27	Age-standardized	536	Gastroesophageal reflux disease	3	Rate	1996	9080.16427416612	10176.9792964364	8019.9007065662
5	Prevalence	1	Global	2	Female	27	Age-standardized	536	Gastroesophageal reflux disease	3	Rate	1996	9865.43877388238	11046.0292707265	8758.41304366069
5	Prevalence	1	Global	3	Both	27	Age-standardized	536	Gastroesophageal reflux disease	3	Rate	1996	9474.07085465216	10585.8039009564	8406.45664221975
5	Prevalence	1	Global	1	Male	27	Age-standardized	536	Gastroesophageal reflux disease	3	Rate	1997	9094.44070307509	10190.1057822376	8037.14614248202
5	Prevalence	1	Global	2	Female	27	Age-standardized	536	Gastroesophageal reflux disease	3	Rate	1997	9884.22070384422	11049.3067900783	8775.13395195548
5	Prevalence	1	Global	3	Both	27	Age-standardized	536	Gastroesophageal reflux disease	3	Rate	1997	9490.7203561608	10603.8154436331	8428.84239780877
5	Prevalence	1	Global	1	Male	27	Age-standardized	536	Gastroesophageal reflux disease	3	Rate	1998	9110.15270792794	10202.4007781196	8059.85526340195
5	Prevalence	1	Global	2	Female	27	Age-standardized	536	Gastroesophageal reflux disease	3	Rate	1998	9905.98145098946	11062.9139247916	8813.53090624671
5	Prevalence	1	Global	3	Both	27	Age-standardized	536	Gastroesophageal reflux disease	3	Rate	1998	9509.59255340355	10624.0948473736	8458.12898610282
5	Prevalence	1	Global	1	Male	27	Age-standardized	536	Gastroesophageal reflux disease	3	Rate	1999	9124.03021357943	10212.1846301744	8078.32853941249
5	Prevalence	1	Global	2	Female	27	Age-standardized	536	Gastroesophageal reflux disease	3	Rate	1999	9925.05287028694	11080.5529630546	8849.04553765804
5	Prevalence	1	Global	3	Both	27	Age-standardized	536	Gastroesophageal reflux disease	3	Rate	1999	9526.19887672381	10640.8708646313	8483.83138725937
5	Prevalence	1	Global	1	Male	27	Age-standardized	536	Gastroesophageal reflux disease	3	Rate	2000	9134.78880474023	10224.3063229742	8091.64337804912
5	Prevalence	1	Global	2	Female	27	Age-standardized	536	Gastroesophageal reflux disease	3	Rate	2000	9938.48748904048	11101.1030680726	8877.6101936149
5	Prevalence	1	Global	3	Both	27	Age-standardized	536	Gastroesophageal reflux disease	3	Rate	2000	9538.38230898533	10652.1383431109	8503.8823614653
5	Prevalence	1	Global	1	Male	27	Age-standardized	536	Gastroesophageal reflux disease	3	Rate	2001	9137.1	10228.0994955677	8097.35677805853
5	Prevalence	1	Global	2	Female	27	Age-standardized	536	Gastroesophageal reflux disease	3	Rate	2001	9931.29868065105	11095.1788567607	8858.9759904916
5	Prevalence	1	Global	3	Both	27	Age-standardized	536	Gastroesophageal reflux disease	3	Rate	2001	9535.99073094729	10655.978780477	8488.37412769464
5	Prevalence	1	Global	1	Male	27	Age-standardized	536	Gastroesophageal reflux disease	3	Rate	2002	9132.07729523932	10223.6999182391	8090.89045019772
5	Prevalence	1	Global	2	Female	27	Age-standardized	536	Gastroesophageal reflux disease	3	Rate	2002	9901.71550916049	11055.3000290811	8819.7639818556
5	Prevalence	1	Global	3	Both	27	Age-standardized	536	Gastroesophageal reflux disease	3	Rate	2002	9518.67140978924	10638.7359865878	8458.77440753553
5	Prevalence	1	Global	1	Male	27	Age-standardized	536	Gastroesophageal reflux disease	3	Rate	2003	9123.52095502718	10220.8762522935	8071.30612907141
5	Prevalence	1	Global	2	Female	27	Age-standardized	536	Gastroesophageal reflux disease	3	Rate	2003	9861.99854169118	11009.6443859156	8771.92395657893
5	Prevalence	1	Global	3	Both	27	Age-standardized	536	Gastroesophageal reflux disease	3	Rate	2003	9494.45807248411	10614.6370071248	8423.02030977238
5	Prevalence	1	Global	1	Male	27	Age-standardized	536	Gastroesophageal reflux disease	3	Rate	2004	9114.60752240006	10201.9037442834	8054.88516679859
5	Prevalence	1	Global	2	Female	27	Age-standardized	536	Gastroesophageal reflux disease	3	Rate	2004	9824.40341936186	10968.9783855367	8730.66329051915
5	Prevalence	1	Global	3	Both	27	Age-standardized	536	Gastroesophageal reflux disease	3	Rate	2004	9471.14512499888	10590.9864788202	8391.60184562657
5	Prevalence	1	Global	1	Male	27	Age-standardized	536	Gastroesophageal reflux disease	3	Rate	2005	9111.66654117765	10190.0466695874	8047.17047813341
5	Prevalence	1	Global	2	Female	27	Age-standardized	536	Gastroesophageal reflux disease	3	Rate	2005	9803.86270565052	10947.993489709	8706.51080492778
5	Prevalence	1	Global	3	Both	27	Age-standardized	536	Gastroesophageal reflux disease	3	Rate	2005	9459.37936222084	10576.4248938216	8383.31723091868
5	Prevalence	1	Global	1	Male	27	Age-standardized	536	Gastroesophageal reflux disease	3	Rate	2006	9103.2222241265	10176.4863639771	8032.88341948668
5	Prevalence	1	Global	2	Female	27	Age-standardized	536	Gastroesophageal reflux disease	3	Rate	2006	9788.69033236864	10928.2185924352	8698.08383791605
5	Prevalence	1	Global	3	Both	27	Age-standardized	536	Gastroesophageal reflux disease	3	Rate	2006	9447.58264877285	10564.2333592588	8375.89270934484
5	Prevalence	1	Global	1	Male	27	Age-standardized	536	Gastroesophageal reflux disease	3	Rate	2007	9082.83869390898	10155.3204125385	8017.71113539751
5	Prevalence	1	Global	2	Female	27	Age-standardized	536	Gastroesophageal reflux disease	3	Rate	2007	9766.19970815488	10903.0539050948	8689.72195416156
5	Prevalence	1	Global	3	Both	27	Age-standardized	536	Gastroesophageal reflux disease	3	Rate	2007	9426.1994433722	10541.8357863982	8359.73652758371
5	Prevalence	1	Global	1	Male	27	Age-standardized	536	Gastroesophageal reflux disease	3	Rate	2008	9060.32855004584	10133.0610056765	8000.27353300669
5	Prevalence	1	Global	2	Female	27	Age-standardized	536	Gastroesophageal reflux disease	3	Rate	2008	9744.93272807731	10880.4222692243	8681.99750839345
5	Prevalence	1	Global	3	Both	27	Age-standardized	536	Gastroesophageal reflux disease	3	Rate	2008	9404.38033743881	10519.4170356451	8343.16949282753
5	Prevalence	1	Global	1	Male	27	Age-standardized	536	Gastroesophageal reflux disease	3	Rate	2009	9045.48183590959	10119.6115514198	7988.56880045998
5	Prevalence	1	Global	2	Female	27	Age-standardized	536	Gastroesophageal reflux disease	3	Rate	2009	9733.58670753509	10870.0975405362	8668.36659995307
5	Prevalence	1	Global	3	Both	27	Age-standardized	536	Gastroesophageal reflux disease	3	Rate	2009	9391.39946845764	10507.2503347698	8334.75004483263
5	Prevalence	1	Global	1	Male	27	Age-standardized	536	Gastroesophageal reflux disease	3	Rate	2010	9050.31657197374	10128.5136312434	7993.47250550149
5	Prevalence	1	Global	2	Female	27	Age-standardized	536	Gastroesophageal reflux disease	3	Rate	2010	9743.00718988584	10882.7304332242	8671.05091977953
5	Prevalence	1	Global	3	Both	27	Age-standardized	536	Gastroesophageal reflux disease	3	Rate	2010	9398.69546527621	10517.5875233806	8342.02490270936
5	Prevalence	1	Global	1	Male	27	Age-standardized	536	Gastroesophageal reflux disease	3	Rate	2011	9073.18361598975	10161.1783560315	8011.78053361246
5	Prevalence	1	Global	2	Female	27	Age-standardized	536	Gastroesophageal reflux disease	3	Rate	2011	9769.48775196962	10918.7556926432	8691.64900994604
5	Prevalence	1	Global	3	Both	27	Age-standardized	536	Gastroesophageal reflux disease	3	Rate	2011	9423.55614011351	10551.7537988881	8357.82483082979
5	Prevalence	1	Global	1	Male	27	Age-standardized	536	Gastroesophageal reflux disease	3	Rate	2012	9102.8269416024	10198.9339586554	8033.76237962809
5	Prevalence	1	Global	2	Female	27	Age-standardized	536	Gastroesophageal reflux disease	3	Rate	2012	9801.39710996079	10961.731472279	8716.91438583057
5	Prevalence	1	Global	3	Both	27	Age-standardized	536	Gastroesophageal reflux disease	3	Rate	2012	9454.49066357264	10592.7370977103	8381.25864502937
5	Prevalence	1	Global	1	Male	27	Age-standardized	536	Gastroesophageal reflux disease	3	Rate	2013	9136.03005881669	10240.8519566158	8056.84786522966
5	Prevalence	1	Global	2	Female	27	Age-standardized	536	Gastroesophageal reflux disease	3	Rate	2013	9836.29545109379	11007.8228221847	8745.15061326692
5	Prevalence	1	Global	3	Both	27	Age-standardized	536	Gastroesophageal reflux disease	3	Rate	2013	9488.67152198283	10636.9956970339	8409.08651088911
5	Prevalence	1	Global	1	Male	27	Age-standardized	536	Gastroesophageal reflux disease	3	Rate	2014	9169.90975435475	10283.498779752	8085.01958126002
5	Prevalence	1	Global	2	Female	27	Age-standardized	536	Gastroesophageal reflux disease	3	Rate	2014	9872.6132677345	11056.5319521046	8775.46744241569
5	Prevalence	1	Global	3	Both	27	Age-standardized	536	Gastroesophageal reflux disease	3	Rate	2014	9523.9090398583	10679.5650114279	8437.89522689378
5	Prevalence	1	Global	1	Male	27	Age-standardized	536	Gastroesophageal reflux disease	3	Rate	2015	9203.51407478233	10326.7189246999	8115.57405761571
5	Prevalence	1	Global	2	Female	27	Age-standardized	536	Gastroesophageal reflux disease	3	Rate	2015	9909.73955134867	11106.1916432188	8807.48186726842
5	Prevalence	1	Global	3	Both	27	Age-standardized	536	Gastroesophageal reflux disease	3	Rate	2015	9559.35794990961	10721.6744595216	8467.58697024244
5	Prevalence	1	Global	1	Male	27	Age-standardized	536	Gastroesophageal reflux disease	3	Rate	2016	9249.74870453203	10380.0691145077	8167.63025806134
5	Prevalence	1	Global	2	Female	27	Age-standardized	536	Gastroesophageal reflux disease	3	Rate	2016	9968.41757611049	11179.6357756101	8858.42080109863
5	Prevalence	1	Global	3	Both	27	Age-standardized	536	Gastroesophageal reflux disease	3	Rate	2016	9611.83624845964	10785.2085750711	8515.8001369707
5	Prevalence	1	Global	1	Male	27	Age-standardized	536	Gastroesophageal reflux disease	3	Rate	2017	9311.15997942539	10456.9828724601	8215.30722589859
5	Prevalence	1	Global	2	Female	27	Age-standardized	536	Gastroesophageal reflux disease	3	Rate	2017	10051.7887085453	11280.8842117963	8937.37845274459
5	Prevalence	1	Global	3	Both	27	Age-standardized	536	Gastroesophageal reflux disease	3	Rate	2017	9684.19935991486	10874.2304282707	8585.62905167461
5	Prevalence	1	Global	1	Male	27	Age-standardized	536	Gastroesophageal reflux disease	3	Rate	2018	9369.03187416694	10527.860166084	8274.42982424564
5	Prevalence	1	Global	2	Female	27	Age-standardized	536	Gastroesophageal reflux disease	3	Rate	2018	10131.5654081176	11369.9351375695	9008.62611676516
5	Prevalence	1	Global	3	Both	27	Age-standardized	536	Gastroesophageal reflux disease	3	Rate	2018	9752.96131167033	10952.2715320007	8656.56
5	Prevalence	1	Global	1	Male	27	Age-standardized	536	Gastroesophageal reflux disease	3	Rate	2019	9406.11914363072	10570.8817138305	8305.01493286761
5	Prevalence	1	Global	2	Female	27	Age-standardized	536	Gastroesophageal reflux disease	3	Rate	2019	10180.9261857903	11443.5160062315	9046.30777161061
5	Prevalence	1	Global	3	Both	27	Age-standardized	536	Gastroesophageal reflux disease	3	Rate	2019	9796.10470544101	11008.1030133331	8699.9308196678
5	Prevalence	1	Global	1	Male	27	Age-standardized	536	Gastroesophageal reflux disease	3	Rate	2020	9425.87689954066	10596.8556672535	8320.4993194602
5	Prevalence	1	Global	2	Female	27	Age-standardized	536	Gastroesophageal reflux disease	3	Rate	2020	10205.6618049047	11473.8389079926	9066.22109445598
5	Prevalence	1	Global	3	Both	27	Age-standardized	536	Gastroesophageal reflux disease	3	Rate	2020	9818.35157019745	11033.1375600116	8717.43253907282
5	Prevalence	1	Global	1	Male	27	Age-standardized	536	Gastroesophageal reflux disease	3	Rate	2021	9442.63015542655	10619.8480343497	8333.56210796124
5	Prevalence	1	Global	2	Female	27	Age-standardized	536	Gastroesophageal reflux disease	3	Rate	2021	10229.0794682308	11502.2288201889	9084.30238307661
5	Prevalence	1	Global	3	Both	27	Age-standardized	536	Gastroesophageal reflux disease	3	Rate	2021	9838.59948915377	11056.0530700217	8732.46389275035
5	Prevalence	6	China	1	Male	22	All ages	536	Gastroesophageal reflux disease	1	Number	1990	24115394.2961418	27745682.7167136	20923781.8069872
5	Prevalence	6	China	2	Female	22	All ages	536	Gastroesophageal reflux disease	1	Number	1990	26516786.823788	30242362.1044551	23036455.2177529
5	Prevalence	6	China	3	Both	22	All ages	536	Gastroesophageal reflux disease	1	Number	1990	50632181.1199298	58122909.3709843	44030373.1885124
5	Prevalence	6	China	1	Male	22	All ages	536	Gastroesophageal reflux disease	3	Rate	1990	3973.93542579666	4572.16457283896	3447.99495058346
5	Prevalence	6	China	2	Female	22	All ages	536	Gastroesophageal reflux disease	3	Rate	1990	4655.18433729822	5309.23189627428	4044.19080747567
5	Prevalence	6	China	3	Both	22	All ages	536	Gastroesophageal reflux disease	3	Rate	1990	4303.78322262171	4940.50219974311	3742.62331234833
5	Prevalence	6	China	1	Male	22	All ages	536	Gastroesophageal reflux disease	1	Number	1991	24244254.2355088	27886344.1910092	21073883.3754527
5	Prevalence	6	China	2	Female	22	All ages	536	Gastroesophageal reflux disease	1	Number	1991	26771019.809468	30529402.2453975	23222501.3373757
5	Prevalence	6	China	3	Both	22	All ages	536	Gastroesophageal reflux disease	1	Number	1991	51015274.0449768	58287898.8305362	44195397.7969763
5	Prevalence	6	China	1	Male	22	All ages	536	Gastroesophageal reflux disease	3	Rate	1991	3936.80238732469	4528.20801656715	3421.99490142177
5	Prevalence	6	China	2	Female	22	All ages	536	Gastroesophageal reflux disease	3	Rate	1991	4639.89998352978	5291.2953628123	4024.87780964932
5	Prevalence	6	China	3	Both	22	All ages	536	Gastroesophageal reflux disease	3	Rate	1991	4276.89761623818	4886.60269361817	3705.1489975324
5	Prevalence	6	China	1	Male	22	All ages	536	Gastroesophageal reflux disease	1	Number	1992	24386854.1299832	28187462.7778761	21131404.9013463
5	Prevalence	6	China	2	Female	22	All ages	536	Gastroesophageal reflux disease	1	Number	1992	27012146.5948391	30864443.9959942	23444936.7847556
5	Prevalence	6	China	3	Both	22	All ages	536	Gastroesophageal reflux disease	1	Number	1992	51399000.7248222	58714347.0410158	44461737.3178835
5	Prevalence	6	China	1	Male	22	All ages	536	Gastroesophageal reflux disease	3	Rate	1992	3913.0070464599	4522.83594611108	3390.65202259534
5	Prevalence	6	China	2	Female	22	All ages	536	Gastroesophageal reflux disease	3	Rate	1992	4633.18822735914	5293.94352515278	4021.33183754685
5	Prevalence	6	China	3	Both	22	All ages	536	Gastroesophageal reflux disease	3	Rate	1992	4261.09366443325	4867.55245548935	3685.97880354188
5	Prevalence	6	China	1	Male	22	All ages	536	Gastroesophageal reflux disease	1	Number	1993	24570409.0167366	28429838.5066686	21196573.303646
5	Prevalence	6	China	2	Female	22	All ages	536	Gastroesophageal reflux disease	1	Number	1993	27274021.7200983	31074977.4292065	23752795.9094718
5	Prevalence	6	China	3	Both	22	All ages	536	Gastroesophageal reflux disease	1	Number	1993	51844430.7368349	59311041.8796171	44926527.0001391
5	Prevalence	6	China	1	Male	22	All ages	536	Gastroesophageal reflux disease	3	Rate	1993	3904.92644551768	4518.29793109534	3368.7294172181
5	Prevalence	6	China	2	Female	22	All ages	536	Gastroesophageal reflux disease	3	Rate	1993	4638.19828701947	5284.58577031575	4039.38144619319
5	Prevalence	6	China	3	Both	22	All ages	536	Gastroesophageal reflux disease	3	Rate	1993	4259.16	4872.55924414502	3690.8332328097
5	Prevalence	6	China	1	Male	22	All ages	536	Gastroesophageal reflux disease	1	Number	1994	24819837.4205084	28702745.1589276	21397269.9312652
5	Prevalence	6	China	2	Female	22	All ages	536	Gastroesophageal reflux disease	1	Number	1994	27582085.3636809	31478172.7807401	24005546.506773
5	Prevalence	6	China	3	Both	22	All ages	536	Gastroesophageal reflux disease	1	Number	1994	52401922.7841893	59898062.0312352	45485273.704423
5	Prevalence	6	China	1	Male	22	All ages	536	Gastroesophageal reflux disease	3	Rate	1994	3914.59091606899	4527.00408796956	3374.78272248453
5	Prevalence	6	China	2	Female	22	All ages	536	Gastroesophageal reflux disease	3	Rate	1994	4656.97929865292	5314.79752406084	4053.11388391601
5	Prevalence	6	China	3	Both	22	All ages	536	Gastroesophageal reflux disease	3	Rate	1994	4273.14472201222	4884.42167822055	3709.12262246186
5	Prevalence	6	China	1	Male	22	All ages	536	Gastroesophageal reflux disease	1	Number	1995	25154692.8075861	29121669.5178369	21643722.1399318
5	Prevalence	6	China	2	Female	22	All ages	536	Gastroesophageal reflux disease	1	Number	1995	27957239.273885	31929633.3891643	24328050.056453
5	Prevalence	6	China	3	Both	22	All ages	536	Gastroesophageal reflux disease	1	Number	1995	53111932.0814712	60878337.7728436	46175631.3353332
5	Prevalence	6	China	1	Male	22	All ages	536	Gastroesophageal reflux disease	3	Rate	1995	3943.81354465157	4565.76574263215	3393.35507632977
5	Prevalence	6	China	2	Female	22	All ages	536	Gastroesophageal reflux disease	3	Rate	1995	4691.44024962561	5358.03860210334	4082.43432449223
5	Prevalence	6	China	3	Both	22	All ages	536	Gastroesophageal reflux disease	3	Rate	1995	4304.92965028667	4934.42718175772	3742.71536857779
5	Prevalence	6	China	1	Male	22	All ages	536	Gastroesophageal reflux disease	1	Number	1996	25616249.8731438	29612952.6954825	22115200.6393949
5	Prevalence	6	China	2	Female	22	All ages	536	Gastroesophageal reflux disease	1	Number	1996	28396183.3682286	32502554.2176867	24715111.4585604
5	Prevalence	6	China	3	Both	22	All ages	536	Gastroesophageal reflux disease	1	Number	1996	54012433.2413724	61641125.4133363	46886318.5398769
5	Prevalence	6	China	1	Male	22	All ages	536	Gastroesophageal reflux disease	3	Rate	1996	3997.88978523961	4621.64921400823	3451.48627034027
5	Prevalence	6	China	2	Female	22	All ages	536	Gastroesophageal reflux disease	3	Rate	1996	4739.74653416099	5425.16107559107	4125.32072912944
5	Prevalence	6	China	3	Both	22	All ages	536	Gastroesophageal reflux disease	3	Rate	1996	4356.36	4971.6522571419	3781.60635184349
5	Prevalence	6	China	1	Male	22	All ages	536	Gastroesophageal reflux disease	1	Number	1997	26181169.7797775	30247542.8657003	22598290.0523006
5	Prevalence	6	China	2	Female	22	All ages	536	Gastroesophageal reflux disease	1	Number	1997	28868684.6571626	33035026.0857096	24992555.6636172
5	Prevalence	6	China	3	Both	22	All ages	536	Gastroesophageal reflux disease	1	Number	1997	5.50499e+07	63122315.4510846	47817437.9412989
5	Prevalence	6	China	1	Male	22	All ages	536	Gastroesophageal reflux disease	3	Rate	1997	4071.63313042796	4704.02578196305	3514.43221375992
5	Prevalence	6	China	2	Female	22	All ages	536	Gastroesophageal reflux disease	3	Rate	1997	4795.64429318917	5487.75381368068	4151.74464523798
5	Prevalence	6	China	3	Both	22	All ages	536	Gastroesophageal reflux disease	3	Rate	1997	4421.70646346179	5070.10151204768	3840.78534945853
5	Prevalence	6	China	1	Male	22	All ages	536	Gastroesophageal reflux disease	1	Number	1998	26785357.5728592	30911060.5100703	23167403.2706941
5	Prevalence	6	China	2	Female	22	All ages	536	Gastroesophageal reflux disease	1	Number	1998	29367616.2238185	33615020.2847654	25452445.5164542
5	Prevalence	6	China	3	Both	22	All ages	536	Gastroesophageal reflux disease	1	Number	1998	56152973.7966777	64462595.2568684	48865902.8584615
5	Prevalence	6	China	1	Male	22	All ages	536	Gastroesophageal reflux disease	3	Rate	1998	4153.37858891554	4793.11640824568	3592.3730509677
5	Prevalence	6	China	2	Female	22	All ages	536	Gastroesophageal reflux disease	3	Rate	1998	4856.54741327241	5558.9441978158	4209.09233804746
5	Prevalence	6	China	3	Both	22	All ages	536	Gastroesophageal reflux disease	3	Rate	1998	4493.65143344747	5158.63032701769	3910.50232213387
5	Prevalence	6	China	1	Male	22	All ages	536	Gastroesophageal reflux disease	1	Number	1999	27368198.2471899	31602890.3484011	23670654.2078726
5	Prevalence	6	China	2	Female	22	All ages	536	Gastroesophageal reflux disease	1	Number	1999	29888983.3830025	34281068.3634406	25963104.5919518
5	Prevalence	6	China	3	Both	22	All ages	536	Gastroesophageal reflux disease	1	Number	1999	57257181.6301923	65626914.0210355	49780076.0332895
5	Prevalence	6	China	1	Male	22	All ages	536	Gastroesophageal reflux disease	3	Rate	1999	4231.98414641724	4886.80072131269	3660.2275545606
5	Prevalence	6	China	2	Female	22	All ages	536	Gastroesophageal reflux disease	3	Rate	1999	4920.35574665633	5643.38537588057	4274.07346857767
5	Prevalence	6	China	3	Both	22	All ages	536	Gastroesophageal reflux disease	3	Rate	1999	4565.40017031652	5232.76060606856	3969.21331316295
5	Prevalence	6	China	1	Male	22	All ages	536	Gastroesophageal reflux disease	1	Number	2000	27845340.4968793	32122285.6973805	24084062.3737433
5	Prevalence	6	China	2	Female	22	All ages	536	Gastroesophageal reflux disease	1	Number	2000	30405785.4573889	34841481.4016235	26408970.0166971
5	Prevalence	6	China	3	Both	22	All ages	536	Gastroesophageal reflux disease	1	Number	2000	58251125.9542683	66800862.4456059	50605300.326825
5	Prevalence	6	China	1	Male	22	All ages	536	Gastroesophageal reflux disease	3	Rate	2000	4292.77565641138	4952.13071951699	3712.91838492998
5	Prevalence	6	China	2	Female	22	All ages	536	Gastroesophageal reflux disease	3	Rate	2000	4981.0440033092	5707.69507813494	4326.28987399748
5	Prevalence	6	China	3	Both	22	All ages	536	Gastroesophageal reflux disease	3	Rate	2000	4626.46190670464	5305.5050932791	4019.20976468694
5	Prevalence	6	China	1	Male	22	All ages	536	Gastroesophageal reflux disease	1	Number	2001	28250905.1603219	32556190.4267595	24439998.8426313
5	Prevalence	6	China	2	Female	22	All ages	536	Gastroesophageal reflux disease	1	Number	2001	30931405.0890001	35242007.2964336	26978924.5913317
5	Prevalence	6	China	3	Both	22	All ages	536	Gastroesophageal reflux disease	1	Number	2001	59182310.2493219	67964918.1338847	51418923.433963
5	Prevalence	6	China	1	Male	22	All ages	536	Gastroesophageal reflux disease	3	Rate	2001	4339.28388907281	5000.56730241824	3753.93611726599
5	Prevalence	6	China	2	Female	22	All ages	536	Gastroesophageal reflux disease	3	Rate	2001	5039.31261962042	5741.59148602111	4395.37857286782
5	Prevalence	6	China	3	Both	22	All ages	536	Gastroesophageal reflux disease	3	Rate	2001	4678.99089023969	5373.34942594567	4065.2126170793
5	Prevalence	6	China	1	Male	22	All ages	536	Gastroesophageal reflux disease	1	Number	2002	28654105.6461274	33029903.9337306	24704990.7019346
5	Prevalence	6	China	2	Female	22	All ages	536	Gastroesophageal reflux disease	1	Number	2002	3.14738e+07	35874032.3285756	27458149.9954699
5	Prevalence	6	China	3	Both	22	All ages	536	Gastroesophageal reflux disease	1	Number	2002	60127948.7547374	68805495.4799221	52307437.7477803
5	Prevalence	6	China	1	Male	22	All ages	536	Gastroesophageal reflux disease	3	Rate	2002	4382.74683235287	5052.04066133685	3778.71573028295
5	Prevalence	6	China	2	Female	22	All ages	536	Gastroesophageal reflux disease	3	Rate	2002	5096.98271877414	5809.56453905288	4446.66752431425
5	Prevalence	6	China	3	Both	22	All ages	536	Gastroesophageal reflux disease	3	Rate	2002	4729.6695090062	5412.24606465245	4114.50745507802
5	Prevalence	6	China	1	Male	22	All ages	536	Gastroesophageal reflux disease	1	Number	2003	29059438.9033202	33450117.4458787	25052824.0576131
5	Prevalence	6	China	2	Female	22	All ages	536	Gastroesophageal reflux disease	1	Number	2003	32032818.1979031	36539670.1733546	27872814.4447596
5	Prevalence	6	China	3	Both	22	All ages	536	Gastroesophageal reflux disease	1	Number	2003	61092257.1012233	69702143.6476672	53223129.6384601
5	Prevalence	6	China	1	Male	22	All ages	536	Gastroesophageal reflux disease	3	Rate	2003	4424.97130733228	5093.55360980479	3814.87158067307
5	Prevalence	6	China	2	Female	22	All ages	536	Gastroesophageal reflux disease	3	Rate	2003	5154.92646182206	5880.1979744388	4485.47198872915
5	Prevalence	6	China	3	Both	22	All ages	536	Gastroesophageal reflux disease	3	Rate	2003	4779.8650295122	5453.50351602656	4164.18361656792
5	Prevalence	6	China	1	Male	22	All ages	536	Gastroesophageal reflux disease	1	Number	2004	29477461.1430311	33873082.3400606	25385645.4321808
5	Prevalence	6	China	2	Female	22	All ages	536	Gastroesophageal reflux disease	1	Number	2004	32615345.5178873	37155851.797033	28388301.5629615
5	Prevalence	6	China	3	Both	22	All ages	536	Gastroesophageal reflux disease	1	Number	2004	62092806.6609184	70746553.4227929	54091928.3433448
5	Prevalence	6	China	1	Male	22	All ages	536	Gastroesophageal reflux disease	3	Rate	2004	4467.88059445013	5134.12218667778	3847.68661227958
5	Prevalence	6	China	2	Female	22	All ages	536	Gastroesophageal reflux disease	3	Rate	2004	5214.60395563369	5940.54880238772	4538.77606609301
5	Prevalence	6	China	3	Both	22	All ages	536	Gastroesophageal reflux disease	3	Rate	2004	4831.27737329338	5504.60256461815	4208.75015217331
5	Prevalence	6	China	1	Male	22	All ages	536	Gastroesophageal reflux disease	1	Number	2005	29886543.8787422	34361577.2010147	25753745.9135938
5	Prevalence	6	China	2	Female	22	All ages	536	Gastroesophageal reflux disease	1	Number	2005	33189084.9155977	37750463.6066953	28826415.905979
5	Prevalence	6	China	3	Both	22	All ages	536	Gastroesophageal reflux disease	1	Number	2005	63075628.7943398	71865791.1487531	54832370.5598653
5	Prevalence	6	China	1	Male	22	All ages	536	Gastroesophageal reflux disease	3	Rate	2005	4507.18274471167	5182.06148124241	3883.91644294482
5	Prevalence	6	China	2	Female	22	All ages	536	Gastroesophageal reflux disease	3	Rate	2005	5270.06	5994.35242399257	4577.31321822434
5	Prevalence	6	China	3	Both	22	All ages	536	Gastroesophageal reflux disease	3	Rate	2005	4878.78905074574	5558.69266278611	4241.1875113627
5	Prevalence	6	China	1	Male	22	All ages	536	Gastroesophageal reflux disease	1	Number	2006	30094959.5549692	34555590.0241038	25958016.8570484
5	Prevalence	6	China	2	Female	22	All ages	536	Gastroesophageal reflux disease	1	Number	2006	33582682.9845435	38321244.8952894	29231806.1548965
5	Prevalence	6	China	3	Both	22	All ages	536	Gastroesophageal reflux disease	1	Number	2006	63677642.5395128	72660664.5814551	55403916.9046533
5	Prevalence	6	China	1	Male	22	All ages	536	Gastroesophageal reflux disease	3	Rate	2006	4512.7957422141	5181.67566384793	3892.4534101747
5	Prevalence	6	China	2	Female	22	All ages	536	Gastroesophageal reflux disease	3	Rate	2006	5293.22536509251	6040.10661075014	4607.45015154924
5	Prevalence	6	China	3	Both	22	All ages	536	Gastroesophageal reflux disease	3	Rate	2006	4893.28489068113	5583.58189725164	4257.49350418976
5	Prevalence	6	China	1	Male	22	All ages	536	Gastroesophageal reflux disease	1	Number	2007	30011980.0925845	34373395.6974548	25965128.3917657
5	Prevalence	6	China	2	Female	22	All ages	536	Gastroesophageal reflux disease	1	Number	2007	33708081.0789478	38478261.648648	29319718.7504333
5	Prevalence	6	China	3	Both	22	All ages	536	Gastroesophageal reflux disease	1	Number	2007	63720061.1715323	72627756.4804177	55450741.2855262
5	Prevalence	6	China	1	Male	22	All ages	536	Gastroesophageal reflux disease	3	Rate	2007	4472.05399346653	5121.94400448071	3869.03682319706
5	Prevalence	6	China	2	Female	22	All ages	536	Gastroesophageal reflux disease	3	Rate	2007	5271.49984571227	6017.4932494394	4585.21778523209
5	Prevalence	6	China	3	Both	22	All ages	536	Gastroesophageal reflux disease	3	Rate	2007	4862.12026414402	5541.81650221827	4231.13487195795
5	Prevalence	6	China	1	Male	22	All ages	536	Gastroesophageal reflux disease	1	Number	2008	29821738.4770163	34129274.372452	25897992.5753965
5	Prevalence	6	China	2	Female	22	All ages	536	Gastroesophageal reflux disease	1	Number	2008	33725029.4206382	38451536.8138239	29428341.5126776
5	Prevalence	6	China	3	Both	22	All ages	536	Gastroesophageal reflux disease	1	Number	2008	63546767.8976545	72277525.7869533	55472550.9998643
5	Prevalence	6	China	1	Male	22	All ages	536	Gastroesophageal reflux disease	3	Rate	2008	4415.10181462115	5052.8315553987	3834.19209791548
5	Prevalence	6	China	2	Female	22	All ages	536	Gastroesophageal reflux disease	3	Rate	2008	5232.9477279747	5966.33674347222	4566.25169799231
5	Prevalence	6	China	3	Both	22	All ages	536	Gastroesophageal reflux disease	3	Rate	2008	4814.42887106823	5475.88836364612	4202.71022305462
5	Prevalence	6	China	1	Male	22	All ages	536	Gastroesophageal reflux disease	1	Number	2009	29725229.8782485	33956221.3619743	25807376.6288963
5	Prevalence	6	China	2	Female	22	All ages	536	Gastroesophageal reflux disease	1	Number	2009	33820451.4900486	38456261.097438	29449933.4653907
5	Prevalence	6	China	3	Both	22	All ages	536	Gastroesophageal reflux disease	1	Number	2009	63545681.368297	72341248.0551964	55495231.8279325
5	Prevalence	6	China	1	Male	22	All ages	536	Gastroesophageal reflux disease	3	Rate	2009	4373.61753688581	4996.14387654513	3797.16474750467
5	Prevalence	6	China	2	Female	22	All ages	536	Gastroesophageal reflux disease	3	Rate	2009	5208.64185683704	5922.59660603608	4535.5443044288
5	Prevalence	6	China	3	Both	22	All ages	536	Gastroesophageal reflux disease	3	Rate	2009	4781.59972805098	5443.43666759656	4175.83035861433
5	Prevalence	6	China	1	Male	22	All ages	536	Gastroesophageal reflux disease	1	Number	2010	29925961.4375719	34165850.3178923	25979821.5899531
5	Prevalence	6	China	2	Female	22	All ages	536	Gastroesophageal reflux disease	1	Number	2010	34178993.3382415	38811449.1924997	29821249.8280837
5	Prevalence	6	China	3	Both	22	All ages	536	Gastroesophageal reflux disease	1	Number	2010	64104954.7758134	72974337.9128575	55832227.165463
5	Prevalence	6	China	1	Male	22	All ages	536	Gastroesophageal reflux disease	3	Rate	2010	4379.52349553489	5000.01126193652	3802.02451641719
5	Prevalence	6	China	2	Female	22	All ages	536	Gastroesophageal reflux disease	3	Rate	2010	5229.16603210668	5937.90196703013	4562.45931800184
5	Prevalence	6	China	3	Both	22	All ages	536	Gastroesophageal reflux disease	3	Rate	2010	4794.90954140887	5458.31988120167	4176.12772195251
5	Prevalence	6	China	1	Male	22	All ages	536	Gastroesophageal reflux disease	1	Number	2011	30374191.1208588	34588137.4283412	26347430.6495826
5	Prevalence	6	China	2	Female	22	All ages	536	Gastroesophageal reflux disease	1	Number	2011	34763483.0766193	39398746.8090224	30396624.4286824
5	Prevalence	6	China	3	Both	22	All ages	536	Gastroesophageal reflux disease	1	Number	2011	65137674.1974783	74183923.249802	56815515.9118635
5	Prevalence	6	China	1	Male	22	All ages	536	Gastroesophageal reflux disease	3	Rate	2011	4424.61435451271	5038.4607363651	3838.03536998931
5	Prevalence	6	China	2	Female	22	All ages	536	Gastroesophageal reflux disease	3	Rate	2011	5288.18150705028	5993.29255406387	4623.89993621268
5	Prevalence	6	China	3	Both	22	All ages	536	Gastroesophageal reflux disease	3	Rate	2011	4847.04759185742	5520.20026770329	4227.77621359094
5	Prevalence	6	China	1	Male	22	All ages	536	Gastroesophageal reflux disease	1	Number	2012	30871357.7760659	35224691.6972124	26838397.6477784
5	Prevalence	6	China	2	Female	22	All ages	536	Gastroesophageal reflux disease	1	Number	2012	35390925.4080222	40211320.4726924	30967229.763881
5	Prevalence	6	China	3	Both	22	All ages	536	Gastroesophageal reflux disease	1	Number	2012	66262283.184088	75478058.8672382	57791592.0379328
5	Prevalence	6	China	1	Male	22	All ages	536	Gastroesophageal reflux disease	3	Rate	2012	4474.3893765877	5105.34675756232	3889.86588121357
5	Prevalence	6	China	2	Female	22	All ages	536	Gastroesophageal reflux disease	3	Rate	2012	5352.25438692798	6081.25427416344	4683.24830288751
5	Prevalence	6	China	3	Both	22	All ages	536	Gastroesophageal reflux disease	3	Rate	2012	4903.99128821531	5586.0396797378	4277.08570045428
5	Prevalence	6	China	1	Male	22	All ages	536	Gastroesophageal reflux disease	1	Number	2013	31407004.8043324	35948717.8243639	27299016.6825933
5	Prevalence	6	China	2	Female	22	All ages	536	Gastroesophageal reflux disease	1	Number	2013	36050189.2879278	40897398.7177195	31578883.0852393
5	Prevalence	6	China	3	Both	22	All ages	536	Gastroesophageal reflux disease	1	Number	2013	67457194.0922602	76724717.4885416	58837320.0297115
5	Prevalence	6	China	1	Male	22	All ages	536	Gastroesophageal reflux disease	3	Rate	2013	4525.61149749853	5180.05240295405	3933.6684455853
5	Prevalence	6	China	2	Female	22	All ages	536	Gastroesophageal reflux disease	3	Rate	2013	5418.07433116866	6146.57372349079	4746.07038771934
5	Prevalence	6	China	3	Both	22	All ages	536	Gastroesophageal reflux disease	3	Rate	2013	4962.45	5644.20968449592	4328.33358521104
5	Prevalence	6	China	1	Male	22	All ages	536	Gastroesophageal reflux disease	1	Number	2014	31980147.4079982	36568531.6197815	27757050.9978309
5	Prevalence	6	China	2	Female	22	All ages	536	Gastroesophageal reflux disease	1	Number	2014	36740748.1676272	41691097.3304361	32165500.7743857
5	Prevalence	6	China	3	Both	22	All ages	536	Gastroesophageal reflux disease	1	Number	2014	68720895.5756254	7.83151e+07	59981726.6853741
5	Prevalence	6	China	1	Male	22	All ages	536	Gastroesophageal reflux disease	3	Rate	2014	4579.3375604862	5236.36267969206	3974.61914671813
5	Prevalence	6	China	2	Female	22	All ages	536	Gastroesophageal reflux disease	3	Rate	2014	5487.27686895885	6226.61773187262	4803.95792629183
5	Prevalence	6	China	3	Both	22	All ages	536	Gastroesophageal reflux disease	3	Rate	2014	5023.75105840041	5725.12433474076	4384.88556349973
5	Prevalence	6	China	1	Male	22	All ages	536	Gastroesophageal reflux disease	1	Number	2015	32560237.905124	37248526.7742197	28160634.4303833
5	Prevalence	6	China	2	Female	22	All ages	536	Gastroesophageal reflux disease	1	Number	2015	37429048.2809321	42474632.9296379	32808313.5517906
5	Prevalence	6	China	3	Both	22	All ages	536	Gastroesophageal reflux disease	1	Number	2015	69989286.1860562	79788937.2087157	60933048.9456696
5	Prevalence	6	China	1	Male	22	All ages	536	Gastroesophageal reflux disease	3	Rate	2015	4629.50517650864	5296.09912621165	4003.95731901917
5	Prevalence	6	China	2	Female	22	All ages	536	Gastroesophageal reflux disease	3	Rate	2015	5552.93459173574	6301.49227134958	4867.40720337956
5	Prevalence	6	China	3	Both	22	All ages	536	Gastroesophageal reflux disease	3	Rate	2015	5081.40500647853	5792.88526984212	4423.89852568911
5	Prevalence	6	China	1	Male	22	All ages	536	Gastroesophageal reflux disease	1	Number	2016	33545194.6902117	38322317.1892068	29077866.0499868
5	Prevalence	6	China	2	Female	22	All ages	536	Gastroesophageal reflux disease	1	Number	2016	38589332.5983661	43799562.487928	33730751.1376692
5	Prevalence	6	China	3	Both	22	All ages	536	Gastroesophageal reflux disease	1	Number	2016	72134527.2885778	82324396.5185667	62995411.3031413
5	Prevalence	6	China	1	Male	22	All ages	536	Gastroesophageal reflux disease	3	Rate	2016	4731.7776544311	5405.62324399987	4101.63059372601
5	Prevalence	6	China	2	Female	22	All ages	536	Gastroesophageal reflux disease	3	Rate	2016	5684.05531359976	6451.50146762043	4968.40557548015
5	Prevalence	6	China	3	Both	22	All ages	536	Gastroesophageal reflux disease	3	Rate	2016	5197.61403651574	5931.83950843391	4539.10001677014
5	Prevalence	6	China	1	Male	22	All ages	536	Gastroesophageal reflux disease	1	Number	2017	34990006.8671672	39923090.2319225	30448511.4213936
5	Prevalence	6	China	2	Female	22	All ages	536	Gastroesophageal reflux disease	1	Number	2017	40283508.0656035	45794825.7412718	35313819.298881
5	Prevalence	6	China	3	Both	22	All ages	536	Gastroesophageal reflux disease	1	Number	2017	75273514.9327707	85743606.6912131	65934473.0324638
5	Prevalence	6	China	1	Male	22	All ages	536	Gastroesophageal reflux disease	3	Rate	2017	4896.85588033124	5587.24152028186	4261.27301910002
5	Prevalence	6	China	2	Female	22	All ages	536	Gastroesophageal reflux disease	3	Rate	2017	5892.64971193996	6698.84227245499	5165.68633447126
5	Prevalence	6	China	3	Both	22	All ages	536	Gastroesophageal reflux disease	3	Rate	2017	5383.74291199765	6132.58906781785	4715.79216357662
5	Prevalence	6	China	1	Male	22	All ages	536	Gastroesophageal reflux disease	1	Number	2018	36378086.4973688	41449036.0312384	31685293.8282149
5	Prevalence	6	China	2	Female	22	All ages	536	Gastroesophageal reflux disease	1	Number	2018	41906575.6998586	47404992.309566	36628135.9021833
5	Prevalence	6	China	3	Both	22	All ages	536	Gastroesophageal reflux disease	1	Number	2018	78284662.1972274	88993402.2444144	68501679.430985
5	Prevalence	6	China	1	Male	22	All ages	536	Gastroesophageal reflux disease	3	Rate	2018	5056.12503675209	5760.92722309465	4403.88219521308
5	Prevalence	6	China	2	Female	22	All ages	536	Gastroesophageal reflux disease	3	Rate	2018	6093.85470238349	6893.40826535433	5326.28912001069
5	Prevalence	6	China	3	Both	22	All ages	536	Gastroesophageal reflux disease	3	Rate	2018	5563.26441262428	6324.27622178898	4868.04
5	Prevalence	6	China	1	Male	22	All ages	536	Gastroesophageal reflux disease	1	Number	2019	37176249.4441271	42464541.1657299	32285074.2242815
5	Prevalence	6	China	2	Female	22	All ages	536	Gastroesophageal reflux disease	1	Number	2019	42841509.9613422	48330759.8998737	37166349.7649406
5	Prevalence	6	China	3	Both	22	All ages	536	Gastroesophageal reflux disease	1	Number	2019	80017759.4054693	90845763.0817544	69796684.1744264
5	Prevalence	6	China	1	Male	22	All ages	536	Gastroesophageal reflux disease	3	Rate	2019	5138.6208402166	5869.58554096229	4462.54686035956
5	Prevalence	6	China	2	Female	22	All ages	536	Gastroesophageal reflux disease	3	Rate	2019	6200.80612174842	6995.31067243693	5379.39324158841
5	Prevalence	6	China	3	Both	22	All ages	536	Gastroesophageal reflux disease	3	Rate	2019	5657.48532546666	6423.05627318924	4934.8259613485
5	Prevalence	6	China	1	Male	22	All ages	536	Gastroesophageal reflux disease	1	Number	2020	37477320.168103	42700609.3854338	32531405.0651409
5	Prevalence	6	China	2	Female	22	All ages	536	Gastroesophageal reflux disease	1	Number	2020	43205117.0828542	48676498.4471572	37432687.5088912
5	Prevalence	6	China	3	Both	22	All ages	536	Gastroesophageal reflux disease	1	Number	2020	80682437.2509572	91285621.6289671	70372190.7683863
5	Prevalence	6	China	1	Male	22	All ages	536	Gastroesophageal reflux disease	3	Rate	2020	5159.99513690893	5879.15399990135	4479.02601306614
5	Prevalence	6	China	2	Female	22	All ages	536	Gastroesophageal reflux disease	3	Rate	2020	6232.89071971451	7022.20745884486	5400.14392602424
5	Prevalence	6	China	3	Both	22	All ages	536	Gastroesophageal reflux disease	3	Rate	2020	5683.92408010817	6430.89823043706	4957.58684674156
5	Prevalence	6	China	1	Male	22	All ages	536	Gastroesophageal reflux disease	1	Number	2021	37766855.9863928	43041961.0317051	32806750.7630404
5	Prevalence	6	China	2	Female	22	All ages	536	Gastroesophageal reflux disease	1	Number	2021	43560404.2855555	49056304.0532884	37677356.0189469
5	Prevalence	6	China	3	Both	22	All ages	536	Gastroesophageal reflux disease	1	Number	2021	81327260.2719484	91949300.710102	70795878.9271165
5	Prevalence	6	China	1	Male	22	All ages	536	Gastroesophageal reflux disease	3	Rate	2021	5187.0178143901	5911.51719693527	4505.78149003078
5	Prevalence	6	China	2	Female	22	All ages	536	Gastroesophageal reflux disease	3	Rate	2021	6270.90978494014	7062.09370978619	5423.99237116893
5	Prevalence	6	China	3	Both	22	All ages	536	Gastroesophageal reflux disease	3	Rate	2021	5716.21800145606	6462.80529041349	4976.0028334764
5	Prevalence	6	China	1	Male	27	Age-standardized	536	Gastroesophageal reflux disease	3	Rate	1990	4237.30342795797	4814.58972026053	3714.42563444395
5	Prevalence	6	China	2	Female	27	Age-standardized	536	Gastroesophageal reflux disease	3	Rate	1990	4896.20036358408	5542.32813912224	4237.55352828691
5	Prevalence	6	China	3	Both	27	Age-standardized	536	Gastroesophageal reflux disease	3	Rate	1990	4562.63269491823	5176.17985479494	3972.14651708703
5	Prevalence	6	China	1	Male	27	Age-standardized	536	Gastroesophageal reflux disease	3	Rate	1991	4160.92388523414	4710.83285267025	3640.25667145314
5	Prevalence	6	China	2	Female	27	Age-standardized	536	Gastroesophageal reflux disease	3	Rate	1991	4829.04954025646	5461.45662188064	4201.03473613948
5	Prevalence	6	China	3	Both	27	Age-standardized	536	Gastroesophageal reflux disease	3	Rate	1991	4490.16748615277	5085.57090910473	3915.80015728905
5	Prevalence	6	China	1	Male	27	Age-standardized	536	Gastroesophageal reflux disease	3	Rate	1992	4096.31405140552	4645.32912784044	3571.41307003184
5	Prevalence	6	China	2	Female	27	Age-standardized	536	Gastroesophageal reflux disease	3	Rate	1992	4769.04924234671	5384.30480756258	4150.75999522761
5	Prevalence	6	China	3	Both	27	Age-standardized	536	Gastroesophageal reflux disease	3	Rate	1992	4427.36315116395	5007.57562720514	3864.95196097654
5	Prevalence	6	China	1	Male	27	Age-standardized	536	Gastroesophageal reflux disease	3	Rate	1993	4045.92942381305	4592.91241579632	3518.74135362024
5	Prevalence	6	China	2	Female	27	Age-standardized	536	Gastroesophageal reflux disease	3	Rate	1993	4719.08657681433	5324.23027038209	4120.40495784421
5	Prevalence	6	China	3	Both	27	Age-standardized	536	Gastroesophageal reflux disease	3	Rate	1993	4376.88590397579	4948.37088354637	3815.47594262087
5	Prevalence	6	China	1	Male	27	Age-standardized	536	Gastroesophageal reflux disease	3	Rate	1994	4012.31263961862	4556.99761419766	3486.03576441748
5	Prevalence	6	China	2	Female	27	Age-standardized	536	Gastroesophageal reflux disease	3	Rate	1994	4682.15482751761	5297.53768720181	4082.89973586269
5	Prevalence	6	China	3	Both	27	Age-standardized	536	Gastroesophageal reflux disease	3	Rate	1994	4341.47901028757	4914.77384691014	3784.06363819754
5	Prevalence	6	China	1	Male	27	Age-standardized	536	Gastroesophageal reflux disease	3	Rate	1995	3997.97139720943	4553.51505415147	3466.5800646891
5	Prevalence	6	China	2	Female	27	Age-standardized	536	Gastroesophageal reflux disease	3	Rate	1995	4661.30042380019	5279.72456250526	4056.89695778174
5	Prevalence	6	China	3	Both	27	Age-standardized	536	Gastroesophageal reflux disease	3	Rate	1995	4323.91147577486	4894.33886985073	3768.26377375784
5	Prevalence	6	China	1	Male	27	Age-standardized	536	Gastroesophageal reflux disease	3	Rate	1996	4005.32238776997	4545.49904093747	3472.32200719124
5	Prevalence	6	China	2	Female	27	Age-standardized	536	Gastroesophageal reflux disease	3	Rate	1996	4653.42029021484	5265.3141186105	4061.66180870251
5	Prevalence	6	China	3	Both	27	Age-standardized	536	Gastroesophageal reflux disease	3	Rate	1996	4324.01091416328	4887.79669193972	3777.83597219885
5	Prevalence	6	China	1	Male	27	Age-standardized	536	Gastroesophageal reflux disease	3	Rate	1997	4028.38483228309	4560.61771086599	3493.78601281335
5	Prevalence	6	China	2	Female	27	Age-standardized	536	Gastroesophageal reflux disease	3	Rate	1997	4651.57075148161	5251.40277189492	4058.50548928503
5	Prevalence	6	China	3	Both	27	Age-standardized	536	Gastroesophageal reflux disease	3	Rate	1997	4335.24698102944	4901.50931285992	3776.69312889472
5	Prevalence	6	China	1	Male	27	Age-standardized	536	Gastroesophageal reflux disease	3	Rate	1998	4056.96055791171	4589.5326637961	3519.40460541339
5	Prevalence	6	China	2	Female	27	Age-standardized	536	Gastroesophageal reflux disease	3	Rate	1998	4652.69416559159	5249.60931706558	4065.68417499819
5	Prevalence	6	China	3	Both	27	Age-standardized	536	Gastroesophageal reflux disease	3	Rate	1998	4350.76086949619	4919.15708855142	3794.41096572781
5	Prevalence	6	China	1	Male	27	Age-standardized	536	Gastroesophageal reflux disease	3	Rate	1999	4081.00912249995	4624.75754795762	3544.80887650586
5	Prevalence	6	China	2	Female	27	Age-standardized	536	Gastroesophageal reflux disease	3	Rate	1999	4653.96992024921	5252.47735712216	4067.7681084603
5	Prevalence	6	China	3	Both	27	Age-standardized	536	Gastroesophageal reflux disease	3	Rate	1999	4363.96409981497	4945.42146285608	3809.07720604682
5	Prevalence	6	China	1	Male	27	Age-standardized	536	Gastroesophageal reflux disease	3	Rate	2000	4090.52952774189	4640.11825126207	3561.90033559285
5	Prevalence	6	China	2	Female	27	Age-standardized	536	Gastroesophageal reflux disease	3	Rate	2000	4652.72081173869	5247.06578445329	4077.05419583329
5	Prevalence	6	China	3	Both	27	Age-standardized	536	Gastroesophageal reflux disease	3	Rate	2000	4368.42074663495	4945.76429158541	3826.35320875688
5	Prevalence	6	China	1	Male	27	Age-standardized	536	Gastroesophageal reflux disease	3	Rate	2001	4088.04398496001	4636.81650851074	3552.77196147867
5	Prevalence	6	China	2	Female	27	Age-standardized	536	Gastroesophageal reflux disease	3	Rate	2001	4649.27339800932	5234.05978828365	4069.19539783456
5	Prevalence	6	China	3	Both	27	Age-standardized	536	Gastroesophageal reflux disease	3	Rate	2001	4365.66583149862	4931.08048628272	3820.48298317826
5	Prevalence	6	China	1	Male	27	Age-standardized	536	Gastroesophageal reflux disease	3	Rate	2002	4082.96500152872	4640.89748165041	3548.0288162621
5	Prevalence	6	China	2	Female	27	Age-standardized	536	Gastroesophageal reflux disease	3	Rate	2002	4645.41806569581	5226.62195744959	4072.55893579917
5	Prevalence	6	China	3	Both	27	Age-standardized	536	Gastroesophageal reflux disease	3	Rate	2002	4361.39313114163	4935.91088609328	3818.91311411896
5	Prevalence	6	China	1	Male	27	Age-standardized	536	Gastroesophageal reflux disease	3	Rate	2003	4075.51381578564	4625.64996797962	3553.04628399241
5	Prevalence	6	China	2	Female	27	Age-standardized	536	Gastroesophageal reflux disease	3	Rate	2003	4640.42859667121	5220.55376056736	4072.53858872468
5	Prevalence	6	China	3	Both	27	Age-standardized	536	Gastroesophageal reflux disease	3	Rate	2003	4355.34655928267	4922.31212311783	3817.22280522678
5	Prevalence	6	China	1	Male	27	Age-standardized	536	Gastroesophageal reflux disease	3	Rate	2004	4065.93633282934	4616.84980199648	3548.40963086032
5	Prevalence	6	China	2	Female	27	Age-standardized	536	Gastroesophageal reflux disease	3	Rate	2004	4633.73288598562	5221.00295648694	4064.39231208858
5	Prevalence	6	China	3	Both	27	Age-standardized	536	Gastroesophageal reflux disease	3	Rate	2004	4347.40580485955	4913.13116688744	3813.26803396865
5	Prevalence	6	China	1	Male	27	Age-standardized	536	Gastroesophageal reflux disease	3	Rate	2005	4054.38688565152	4615.06510267219	3548.85056164372
5	Prevalence	6	China	2	Female	27	Age-standardized	536	Gastroesophageal reflux disease	3	Rate	2005	4624.73833723998	5203.9675294384	4053.93787351792
5	Prevalence	6	China	3	Both	27	Age-standardized	536	Gastroesophageal reflux disease	3	Rate	2005	4337.34585030276	4918.44032640817	3806.58384713652
5	Prevalence	6	China	1	Male	27	Age-standardized	536	Gastroesophageal reflux disease	3	Rate	2006	4014.98744619187	4564.29478653037	3512.45360749807
5	Prevalence	6	China	2	Female	27	Age-standardized	536	Gastroesophageal reflux disease	3	Rate	2006	4588.52079193966	5174.16840076855	4029.63728142566
5	Prevalence	6	China	3	Both	27	Age-standardized	536	Gastroesophageal reflux disease	3	Rate	2006	4299.69118022129	4862.78846490625	3767.23631172884
5	Prevalence	6	China	1	Male	27	Age-standardized	536	Gastroesophageal reflux disease	3	Rate	2007	3939.18686789864	4467.37200934588	3444.14849276651
5	Prevalence	6	China	2	Female	27	Age-standardized	536	Gastroesophageal reflux disease	3	Rate	2007	4517.25968299971	5105.58861738785	3971.40636531031
5	Prevalence	6	China	3	Both	27	Age-standardized	536	Gastroesophageal reflux disease	3	Rate	2007	4226.20081534231	4770.94510859686	3699.62433962561
5	Prevalence	6	China	1	Male	27	Age-standardized	536	Gastroesophageal reflux disease	3	Rate	2008	3852.88052088888	4367.35647315879	3370.19602517446
5	Prevalence	6	China	2	Female	27	Age-standardized	536	Gastroesophageal reflux disease	3	Rate	2008	4435.55257644456	5010.59531435733	3883.84058346199
5	Prevalence	6	China	3	Both	27	Age-standardized	536	Gastroesophageal reflux disease	3	Rate	2008	4142.18439050837	4674.89988847208	3630.42366751456
5	Prevalence	6	China	1	Male	27	Age-standardized	536	Gastroesophageal reflux disease	3	Rate	2009	3781.86543805339	4274.24948824812	3305.90780922525
5	Prevalence	6	China	2	Female	27	Age-standardized	536	Gastroesophageal reflux disease	3	Rate	2009	4368.05138541194	4930.45779472214	3811.11710145637
5	Prevalence	6	China	3	Both	27	Age-standardized	536	Gastroesophageal reflux disease	3	Rate	2009	4072.96130045734	4596.94588281178	3563.96524872473
5	Prevalence	6	China	1	Male	27	Age-standardized	536	Gastroesophageal reflux disease	3	Rate	2010	3751.77833949135	4231.15067229873	3280.01621174359
5	Prevalence	6	China	2	Female	27	Age-standardized	536	Gastroesophageal reflux disease	3	Rate	2010	4339.29038756119	4889.00412608504	3798.1582436221
5	Prevalence	6	China	3	Both	27	Age-standardized	536	Gastroesophageal reflux disease	3	Rate	2010	4043.64454213307	4565.76765086917	3537.72111252959
5	Prevalence	6	China	1	Male	27	Age-standardized	536	Gastroesophageal reflux disease	3	Rate	2011	3756.31599497941	4248.37231001635	3277.52543445114
5	Prevalence	6	China	2	Female	27	Age-standardized	536	Gastroesophageal reflux disease	3	Rate	2011	4343.96619781928	4900.57418757201	3800.94081204448
5	Prevalence	6	China	3	Both	27	Age-standardized	536	Gastroesophageal reflux disease	3	Rate	2011	4048.41638381646	4572.16433605973	3539.82448358634
5	Prevalence	6	China	1	Male	27	Age-standardized	536	Gastroesophageal reflux disease	3	Rate	2012	3770.60985334132	4269.7612116921	3280.33110699974
5	Prevalence	6	China	2	Female	27	Age-standardized	536	Gastroesophageal reflux disease	3	Rate	2012	4358.9926468339	4912.44538015763	3814.33206896449
5	Prevalence	6	China	3	Both	27	Age-standardized	536	Gastroesophageal reflux disease	3	Rate	2012	4063.22251557632	4584.72564822572	3561.17538484911
5	Prevalence	6	China	1	Male	27	Age-standardized	536	Gastroesophageal reflux disease	3	Rate	2013	3792.32138298026	4297.69133327163	3301.05937657089
5	Prevalence	6	China	2	Female	27	Age-standardized	536	Gastroesophageal reflux disease	3	Rate	2013	4381.91636908696	4944.29953458249	3837.56284519485
5	Prevalence	6	China	3	Both	27	Age-standardized	536	Gastroesophageal reflux disease	3	Rate	2013	4085.64535012868	4616.02808742681	3577.15108822698
5	Prevalence	6	China	1	Male	27	Age-standardized	536	Gastroesophageal reflux disease	3	Rate	2014	3819.19665085176	4328.17459566801	3321.02773297774
5	Prevalence	6	China	2	Female	27	Age-standardized	536	Gastroesophageal reflux disease	3	Rate	2014	4410.40117870713	4985.16846958144	3861.56574117734
5	Prevalence	6	China	3	Both	27	Age-standardized	536	Gastroesophageal reflux disease	3	Rate	2014	4113.37112193519	4653.71408002685	3603.76602139064
5	Prevalence	6	China	1	Male	27	Age-standardized	536	Gastroesophageal reflux disease	3	Rate	2015	3848.95044101483	4355.45118877183	3346.98716149048
5	Prevalence	6	China	2	Female	27	Age-standardized	536	Gastroesophageal reflux disease	3	Rate	2015	4442.11092029602	5036.29488152637	3888.62857008222
5	Prevalence	6	China	3	Both	27	Age-standardized	536	Gastroesophageal reflux disease	3	Rate	2015	4144.0966732372	4695.32868849874	3633.19054917584
5	Prevalence	6	China	1	Male	27	Age-standardized	536	Gastroesophageal reflux disease	3	Rate	2016	3923.46786252194	4451.69572959846	3420.51557041222
5	Prevalence	6	China	2	Female	27	Age-standardized	536	Gastroesophageal reflux disease	3	Rate	2016	4528.0072058269	5136.80868724345	3969.14924190553
5	Prevalence	6	China	3	Both	27	Age-standardized	536	Gastroesophageal reflux disease	3	Rate	2016	4224.22231240158	4791.08456079625	3695.88333363151
5	Prevalence	6	China	1	Male	27	Age-standardized	536	Gastroesophageal reflux disease	3	Rate	2017	4047.76194904604	4599.08088314789	3537.57691935476
5	Prevalence	6	China	2	Female	27	Age-standardized	536	Gastroesophageal reflux disease	3	Rate	2017	4674.61724884706	5297.57920765026	4092.63167797349
5	Prevalence	6	China	3	Both	27	Age-standardized	536	Gastroesophageal reflux disease	3	Rate	2017	4359.47214163914	4951.24768457966	3807.00001067905
5	Prevalence	6	China	1	Male	27	Age-standardized	536	Gastroesophageal reflux disease	3	Rate	2018	4164.2253992164	4741.19143212347	3642.11570727841
5	Prevalence	6	China	2	Female	27	Age-standardized	536	Gastroesophageal reflux disease	3	Rate	2018	4812.81604537956	5453.7369026112	4202.06600829366
5	Prevalence	6	China	3	Both	27	Age-standardized	536	Gastroesophageal reflux disease	3	Rate	2018	4486.50475202211	5095.70119237973	3916.39088759949
5	Prevalence	6	China	1	Male	27	Age-standardized	536	Gastroesophageal reflux disease	3	Rate	2019	4215.45750931152	4797.63693911959	3687.0639905255
5	Prevalence	6	China	2	Female	27	Age-standardized	536	Gastroesophageal reflux disease	3	Rate	2019	4873.75941200426	5527.25977100237	4217.62259485422
5	Prevalence	6	China	3	Both	27	Age-standardized	536	Gastroesophageal reflux disease	3	Rate	2019	4542.2399406439	5158.44723916701	3951.9832136057
5	Prevalence	6	China	1	Male	27	Age-standardized	536	Gastroesophageal reflux disease	3	Rate	2020	4215.00760222428	4797.38546953372	3686.46919778819
5	Prevalence	6	China	2	Female	27	Age-standardized	536	Gastroesophageal reflux disease	3	Rate	2020	4873.24832921708	5525.94742005513	4217.15760949225
5	Prevalence	6	China	3	Both	27	Age-standardized	536	Gastroesophageal reflux disease	3	Rate	2020	4541.42803326504	5157.05823720289	3951.37542694635
5	Prevalence	6	China	1	Male	27	Age-standardized	536	Gastroesophageal reflux disease	3	Rate	2021	4214.58350222842	4797.00848545753	3685.85507800535
5	Prevalence	6	China	2	Female	27	Age-standardized	536	Gastroesophageal reflux disease	3	Rate	2021	4872.78829218879	5524.77353013461	4216.67480712159
5	Prevalence	6	China	3	Both	27	Age-standardized	536	Gastroesophageal reflux disease	3	Rate	2021	4540.66476510182	5156.55887628057	3950.76
6	Incidence	1	Global	1	Male	22	All ages	536	Gastroesophageal reflux disease	1	Number	1990	85866820.1268992	95752172.244752	75420550.7168785
6	Incidence	1	Global	2	Female	22	All ages	536	Gastroesophageal reflux disease	1	Number	1990	94151413.2452665	104509680.258286	83136773.0903038
6	Incidence	1	Global	3	Both	22	All ages	536	Gastroesophageal reflux disease	1	Number	1990	180018233.372166	199950073.373944	158660995.151226
6	Incidence	1	Global	1	Male	22	All ages	536	Gastroesophageal reflux disease	3	Rate	1990	3197.1346400313	3565.2023248272	2808.18196028237
6	Incidence	1	Global	2	Female	22	All ages	536	Gastroesophageal reflux disease	3	Rate	1990	3555.72754352716	3946.91843543079	3139.74802679898
6	Incidence	1	Global	3	Both	22	All ages	536	Gastroesophageal reflux disease	3	Rate	1990	3375.15829308026	3748.85996661725	2974.73185655552
6	Incidence	1	Global	1	Male	22	All ages	536	Gastroesophageal reflux disease	1	Number	1991	87490787.1831037	97591881.1696316	76868423.5710362
6	Incidence	1	Global	2	Female	22	All ages	536	Gastroesophageal reflux disease	1	Number	1991	95927175.7988676	106453368.157625	84704761.0103776
6	Incidence	1	Global	3	Both	22	All ages	536	Gastroesophageal reflux disease	1	Number	1991	183417962.981971	203868398.172336	161694542.319546
6	Incidence	1	Global	1	Male	22	All ages	536	Gastroesophageal reflux disease	3	Rate	1991	3206.46999236604	3576.66731028577	2817.16854398824
6	Incidence	1	Global	2	Female	22	All ages	536	Gastroesophageal reflux disease	3	Rate	1991	3568.79415235526	3960.40177995043	3151.28484971049
6	Incidence	1	Global	3	Both	22	All ages	536	Gastroesophageal reflux disease	3	Rate	1991	3386.27326399693	3763.83040614577	2985.21418888901
6	Incidence	1	Global	1	Male	22	All ages	536	Gastroesophageal reflux disease	1	Number	1992	89143326.677288	99403269.1536268	78340185.4296657
6	Incidence	1	Global	2	Female	22	All ages	536	Gastroesophageal reflux disease	1	Number	1992	97737667.6261694	108412700.538925	86298032.9064566
6	Incidence	1	Global	3	Both	22	All ages	536	Gastroesophageal reflux disease	1	Number	1992	186880994.303457	207834344.798118	164779935.359826
6	Incidence	1	Global	1	Male	22	All ages	536	Gastroesophageal reflux disease	3	Rate	1992	3218.00621553714	3588.38232657724	2828.0210424683
6	Incidence	1	Global	2	Female	22	All ages	536	Gastroesophageal reflux disease	3	Rate	1992	3583.9859820111	3975.43350931611	3164.50093115441
6	Incidence	1	Global	3	Both	22	All ages	536	Gastroesophageal reflux disease	3	Rate	1992	3399.56221374524	3780.72573900635	2997.52066239023
6	Incidence	1	Global	1	Male	22	All ages	536	Gastroesophageal reflux disease	1	Number	1993	90816972.1076729	101260008.937134	79825547.188215
6	Incidence	1	Global	2	Female	22	All ages	536	Gastroesophageal reflux disease	1	Number	1993	99579573.4336541	110413964.289366	87966671.5673571
6	Incidence	1	Global	3	Both	22	All ages	536	Gastroesophageal reflux disease	1	Number	1993	190396545.541327	211877363.251393	167912627.829996
6	Incidence	1	Global	1	Male	22	All ages	536	Gastroesophageal reflux disease	3	Rate	1993	3231.68010843419	3603.29076237014	2840.5553169861
6	Incidence	1	Global	2	Female	22	All ages	536	Gastroesophageal reflux disease	3	Rate	1993	3601.09389221639	3992.89772698962	3181.13678113785
6	Incidence	1	Global	3	Both	22	All ages	536	Gastroesophageal reflux disease	3	Rate	1993	3414.89786772936	3800.17165715987	3011.63276419332
6	Incidence	1	Global	1	Male	22	All ages	536	Gastroesophageal reflux disease	1	Number	1994	92502100.6938528	103131955.762605	81312554.514313
6	Incidence	1	Global	2	Female	22	All ages	536	Gastroesophageal reflux disease	1	Number	1994	101445754.922933	112453562.094703	89664244.6090472
6	Incidence	1	Global	3	Both	22	All ages	536	Gastroesophageal reflux disease	1	Number	1994	193947855.616786	215942838.899488	171074932.396882
6	Incidence	1	Global	1	Male	22	All ages	536	Gastroesophageal reflux disease	3	Rate	1994	3247.67311386651	3620.87863300752	2854.81729750045
6	Incidence	1	Global	2	Female	22	All ages	536	Gastroesophageal reflux disease	3	Rate	1994	3620.2164325667	4013.04355914327	3199.77875854885
6	Incidence	1	Global	3	Both	22	All ages	536	Gastroesophageal reflux disease	3	Rate	1994	3432.42649069435	3821.68659899426	3027.62888501861
6	Incidence	1	Global	1	Male	22	All ages	536	Gastroesophageal reflux disease	1	Number	1995	94244288.7948546	105113637.047967	82837350.9096174
6	Incidence	1	Global	2	Female	22	All ages	536	Gastroesophageal reflux disease	1	Number	1995	103365606.928225	114551299.377193	91395358.8748679
6	Incidence	1	Global	3	Both	22	All ages	536	Gastroesophageal reflux disease	1	Number	1995	197609895.723079	220163347.954419	174327553.522576
6	Incidence	1	Global	1	Male	22	All ages	536	Gastroesophageal reflux disease	3	Rate	1995	3266.22634474925	3642.92558104833	2870.89585300157
6	Incidence	1	Global	2	Female	22	All ages	536	Gastroesophageal reflux disease	3	Rate	1995	3641.37388913474	4035.42457607016	3219.6847992789
6	Incidence	1	Global	3	Both	22	All ages	536	Gastroesophageal reflux disease	3	Rate	1995	3452.26732633128	3846.2786988353	3045.52216326568
6	Incidence	1	Global	1	Male	22	All ages	536	Gastroesophageal reflux disease	1	Number	1996	96095354.8536991	107223436.651831	84492558.6367292
6	Incidence	1	Global	2	Female	22	All ages	536	Gastroesophageal reflux disease	1	Number	1996	105401877.265082	116845557.010347	93217273.782163
6	Incidence	1	Global	3	Both	22	All ages	536	Gastroesophageal reflux disease	1	Number	1996	201497232.118781	224396121.226689	177847486.90042
6	Incidence	1	Global	1	Male	22	All ages	536	Gastroesophageal reflux disease	3	Rate	1996	3287.80079183687	3668.53632482102	2890.8234077817
6	Incidence	1	Global	2	Female	22	All ages	536	Gastroesophageal reflux disease	3	Rate	1996	3665.37568733999	4063.33240879864	3241.65316431654
6	Incidence	1	Global	3	Both	22	All ages	536	Gastroesophageal reflux disease	3	Rate	1996	3475.05225356054	3869.97001675622	3067.18511040918
6	Incidence	1	Global	1	Male	22	All ages	536	Gastroesophageal reflux disease	1	Number	1997	98044497.045737	109393388.724355	86233623.0646607
6	Incidence	1	Global	2	Female	22	All ages	536	Gastroesophageal reflux disease	1	Number	1997	107560635.419941	119244369.720994	95155153.6276993
6	Incidence	1	Global	3	Both	22	All ages	536	Gastroesophageal reflux disease	1	Number	1997	205605132.465678	228674265.319917	181516839.923364
6	Incidence	1	Global	1	Male	22	All ages	536	Gastroesophageal reflux disease	3	Rate	1997	3312.20592772101	3695.60191039861	2913.20294447924
6	Incidence	1	Global	2	Female	22	All ages	536	Gastroesophageal reflux disease	3	Rate	1997	3692.46085529444	4093.55305209918	3266.59170967178
6	Incidence	1	Global	3	Both	22	All ages	536	Gastroesophageal reflux disease	3	Rate	1997	3500.80808753235	3893.60279017412	3090.66030408121
6	Incidence	1	Global	1	Male	22	All ages	536	Gastroesophageal reflux disease	1	Number	1998	100049857.855792	111609745.750698	88022040.652727
6	Incidence	1	Global	2	Female	22	All ages	536	Gastroesophageal reflux disease	1	Number	1998	109788699.050546	121724584.483815	97142842.5044872
6	Incidence	1	Global	3	Both	22	All ages	536	Gastroesophageal reflux disease	1	Number	1998	209838556.906338	233220715.784244	185271243.64712
6	Incidence	1	Global	1	Male	22	All ages	536	Gastroesophageal reflux disease	3	Rate	1998	3337.94161793249	3723.61164015938	2936.66017210712
6	Incidence	1	Global	2	Female	22	All ages	536	Gastroesophageal reflux disease	3	Rate	1998	3720.98201196292	4125.51558762353	3292.38594387321
6	Incidence	1	Global	3	Both	22	All ages	536	Gastroesophageal reflux disease	3	Rate	1998	3527.9541684797	3921.07155404285	3114.91112958818
6	Incidence	1	Global	1	Male	22	All ages	536	Gastroesophageal reflux disease	1	Number	1999	102081412.251988	113839746.538778	89825294.8654042
6	Incidence	1	Global	2	Female	22	All ages	536	Gastroesophageal reflux disease	1	Number	1999	112053470.837734	124192486.334749	9.91549e+07
6	Incidence	1	Global	3	Both	22	All ages	536	Gastroesophageal reflux disease	1	Number	1999	214134883.089722	237855692.325882	189061365.029599
6	Incidence	1	Global	1	Male	22	All ages	536	Gastroesophageal reflux disease	3	Rate	1999	3363.92372089015	3751.40013557621	2960.04368932309
6	Incidence	1	Global	2	Female	22	All ages	536	Gastroesophageal reflux disease	3	Rate	1999	3749.75173419127	4155.97114061394	3318.11425163332
6	Incidence	1	Global	3	Both	22	All ages	536	Gastroesophageal reflux disease	3	Rate	1999	3555.35462948469	3949.19933015202	3139.05044201995
6	Incidence	1	Global	1	Male	22	All ages	536	Gastroesophageal reflux disease	1	Number	2000	104104319.150978	116040827.120202	91613253.995065
6	Incidence	1	Global	2	Female	22	All ages	536	Gastroesophageal reflux disease	1	Number	2000	114321561.969347	126693518.861761	101163735.142953
6	Incidence	1	Global	3	Both	22	All ages	536	Gastroesophageal reflux disease	1	Number	2000	218425881.120325	242542922.582249	192834164.247491
6	Incidence	1	Global	1	Male	22	All ages	536	Gastroesophageal reflux disease	3	Rate	2000	3388.60395046952	3777.13824365925	2982.01877630864
6	Incidence	1	Global	2	Female	22	All ages	536	Gastroesophageal reflux disease	3	Rate	2000	3777.24103229594	4186.01661599863	3342.49991672383
6	Incidence	1	Global	3	Both	22	All ages	536	Gastroesophageal reflux disease	3	Rate	2000	3581.46958867669	3976.91013867797	3161.84918823711
6	Incidence	1	Global	1	Male	22	All ages	536	Gastroesophageal reflux disease	1	Number	2001	106101063.022603	118185114.600928	93233711.1897377
6	Incidence	1	Global	2	Female	22	All ages	536	Gastroesophageal reflux disease	1	Number	2001	116493703.929714	129084185.530814	103176957.203764
6	Incidence	1	Global	3	Both	22	All ages	536	Gastroesophageal reflux disease	1	Number	2001	222594766.952317	247345472.602781	196401287.199938
6	Incidence	1	Global	1	Male	22	All ages	536	Gastroesophageal reflux disease	3	Rate	2001	3411.08048949227	3799.57492487848	2997.40345800797
6	Incidence	1	Global	2	Female	22	All ages	536	Gastroesophageal reflux disease	3	Rate	2001	3799.88029811199	4210.56620958948	3365.50451803192
6	Incidence	1	Global	3	Both	22	All ages	536	Gastroesophageal reflux disease	3	Rate	2001	3604.07147579564	4004.81455462894	3179.96818477981
6	Incidence	1	Global	1	Male	22	All ages	536	Gastroesophageal reflux disease	1	Number	2002	108086531.647311	120401168.743952	94932305.8753434
6	Incidence	1	Global	2	Female	22	All ages	536	Gastroesophageal reflux disease	1	Number	2002	118533386.361873	131395286.18281	105103226.851389
6	Incidence	1	Global	3	Both	22	All ages	536	Gastroesophageal reflux disease	1	Number	2002	226619918.009184	252006369.615082	200079590.749404
6	Incidence	1	Global	1	Male	22	All ages	536	Gastroesophageal reflux disease	3	Rate	2002	3431.73503260408	3822.7233536675	3014.08986700895
6	Incidence	1	Global	2	Female	22	All ages	536	Gastroesophageal reflux disease	3	Rate	2002	3816.5645180021	4230.6948486823	3384.13723458392
6	Incidence	1	Global	3	Both	22	All ages	536	Gastroesophageal reflux disease	3	Rate	2002	3622.80076163956	4028.63471048711	3198.52067780775
6	Incidence	1	Global	1	Male	22	All ages	536	Gastroesophageal reflux disease	1	Number	2003	110082738.23693	122718248.260622	96742448.5012938
6	Incidence	1	Global	2	Female	22	All ages	536	Gastroesophageal reflux disease	1	Number	2003	120525989.48245	1.33655e+08	106950848.631494
6	Incidence	1	Global	3	Both	22	All ages	536	Gastroesophageal reflux disease	1	Number	2003	230608727.719379	256305871.062447	203710785.070036
6	Incidence	1	Global	1	Male	22	All ages	536	Gastroesophageal reflux disease	3	Rate	2003	3451.45359958801	3847.61813230557	3033.19191964588
6	Incidence	1	Global	2	Female	22	All ages	536	Gastroesophageal reflux disease	3	Rate	2003	3830.28435427213	4247.53468532372	3398.86993625543
6	Incidence	1	Global	3	Both	22	All ages	536	Gastroesophageal reflux disease	3	Rate	2003	3639.58945690917	4045.15542533132	3215.07183588388
6	Incidence	1	Global	1	Male	22	All ages	536	Gastroesophageal reflux disease	1	Number	2004	112126578.544315	124947442.069808	98590692.9486556
6	Incidence	1	Global	2	Female	22	All ages	536	Gastroesophageal reflux disease	1	Number	2004	122583415.966493	136036353.270455	108813163.198859
6	Incidence	1	Global	3	Both	22	All ages	536	Gastroesophageal reflux disease	1	Number	2004	234709994.510807	260609861.882774	207426009.657434
6	Incidence	1	Global	1	Male	22	All ages	536	Gastroesophageal reflux disease	3	Rate	2004	3471.44270048691	3868.37707302664	3052.37122023921
6	Incidence	1	Global	2	Female	22	All ages	536	Gastroesophageal reflux disease	3	Rate	2004	3844.66720007672	4266.60083921898	3412.7813798369
6	Incidence	1	Global	3	Both	22	All ages	536	Gastroesophageal reflux disease	3	Rate	2004	3656.84633303994	4060.37339724868	3231.75433740624
6	Incidence	1	Global	1	Male	22	All ages	536	Gastroesophageal reflux disease	1	Number	2005	114250253.370366	127208546.733594	100425396.555611
6	Incidence	1	Global	2	Female	22	All ages	536	Gastroesophageal reflux disease	1	Number	2005	124807149.486273	138468912.383796	110684869.01394
6	Incidence	1	Global	3	Both	22	All ages	536	Gastroesophageal reflux disease	1	Number	2005	239057402.856639	265308137.822475	211310248.64152
6	Incidence	1	Global	1	Male	22	All ages	536	Gastroesophageal reflux disease	3	Rate	2005	3492.52968055609	3888.65330256432	3069.91597659827
6	Incidence	1	Global	2	Female	22	All ages	536	Gastroesophageal reflux disease	3	Rate	2005	3862.71552133166	4285.53988524215	3425.63838110677
6	Incidence	1	Global	3	Both	22	All ages	536	Gastroesophageal reflux disease	3	Rate	2005	3676.47821985288	4080.18985648813	3249.75306131027
6	Incidence	1	Global	1	Male	22	All ages	536	Gastroesophageal reflux disease	1	Number	2006	116352559.197275	129581531.049322	102274060.740497
6	Incidence	1	Global	2	Female	22	All ages	536	Gastroesophageal reflux disease	1	Number	2006	127093689.966304	1.41e+08	112707980.219717
6	Incidence	1	Global	3	Both	22	All ages	536	Gastroesophageal reflux disease	1	Number	2006	243446249.163579	270182624.838179	2.15157e+08
6	Incidence	1	Global	1	Male	22	All ages	536	Gastroesophageal reflux disease	3	Rate	2006	3511.11192759307	3910.31587445909	3086.27224898846
6	Incidence	1	Global	2	Female	22	All ages	536	Gastroesophageal reflux disease	3	Rate	2006	3880.86347681097	4305.50271380405	3441.58930388913
6	Incidence	1	Global	3	Both	22	All ages	536	Gastroesophageal reflux disease	3	Rate	2006	3694.89461352804	4100.68476558318	3265.53283140611
6	Incidence	1	Global	1	Male	22	All ages	536	Gastroesophageal reflux disease	1	Number	2007	118360910.860718	131707795.359213	104093402.584398
6	Incidence	1	Global	2	Female	22	All ages	536	Gastroesophageal reflux disease	1	Number	2007	129321735.178913	143479275.035766	114721707.001338
6	Incidence	1	Global	3	Both	22	All ages	536	Gastroesophageal reflux disease	1	Number	2007	247682646.039631	274873344.077259	218963403.024311
6	Incidence	1	Global	1	Male	22	All ages	536	Gastroesophageal reflux disease	3	Rate	2007	3525.11866735979	3922.62618360478	3100.19240246519
6	Incidence	1	Global	2	Female	22	All ages	536	Gastroesophageal reflux disease	3	Rate	2007	3895.53600147921	4322.00109745437	3455.74190724077
6	Incidence	1	Global	3	Both	22	All ages	536	Gastroesophageal reflux disease	3	Rate	2007	3709.27607028725	4116.48185227507	3279.17891743124
6	Incidence	1	Global	1	Male	22	All ages	536	Gastroesophageal reflux disease	1	Number	2008	120382966.886759	133855034.346719	105930322.269224
6	Incidence	1	Global	2	Female	22	All ages	536	Gastroesophageal reflux disease	1	Number	2008	131586033.440647	145879507.733724	116768896.743874
6	Incidence	1	Global	3	Both	22	All ages	536	Gastroesophageal reflux disease	1	Number	2008	251969000.327406	279476487.909131	222812938.870321
6	Incidence	1	Global	1	Male	22	All ages	536	Gastroesophageal reflux disease	3	Rate	2008	3537.69703731649	3933.60099592604	3112.97683505616
6	Incidence	1	Global	2	Female	22	All ages	536	Gastroesophageal reflux disease	3	Rate	2008	3909.64494181841	4334.32838283226	3469.4025998004
6	Incidence	1	Global	3	Both	22	All ages	536	Gastroesophageal reflux disease	3	Rate	2008	3722.64928047216	4129.0513724781	3291.89077024437
6	Incidence	1	Global	1	Male	22	All ages	536	Gastroesophageal reflux disease	1	Number	2009	122509603.778962	1.36187e+08	107878534.897709
6	Incidence	1	Global	2	Female	22	All ages	536	Gastroesophageal reflux disease	1	Number	2009	133986508.498614	148435457.384878	118968193.277291
6	Incidence	1	Global	3	Both	22	All ages	536	Gastroesophageal reflux disease	1	Number	2009	256496112.277576	284404510.114327	226913386.298377
6	Incidence	1	Global	1	Male	22	All ages	536	Gastroesophageal reflux disease	3	Rate	2009	3552.33271873535	3948.92639293703	3128.0849610598
6	Incidence	1	Global	2	Female	22	All ages	536	Gastroesophageal reflux disease	3	Rate	2009	3926.51323822785	4349.94384863873	3486.39718331167
6	Incidence	1	Global	3	Both	22	All ages	536	Gastroesophageal reflux disease	3	Rate	2009	3738.43163044439	4145.19661530711	3307.2633077225
6	Incidence	1	Global	1	Male	22	All ages	536	Gastroesophageal reflux disease	1	Number	2010	124799114.898328	138712345.349356	109945521.739462
6	Incidence	1	Global	2	Female	22	All ages	536	Gastroesophageal reflux disease	1	Number	2010	136595201.636367	151248508.148923	121343854.658175
6	Incidence	1	Global	3	Both	22	All ages	536	Gastroesophageal reflux disease	1	Number	2010	261394316.534695	289794767.770908	231299461.596661
6	Incidence	1	Global	1	Male	22	All ages	536	Gastroesophageal reflux disease	3	Rate	2010	3573.15715379698	3971.51061134369	3147.87991766889
6	Incidence	1	Global	2	Female	22	All ages	536	Gastroesophageal reflux disease	3	Rate	2010	3950.04012914712	4373.78231083353	3509.00390045306
6	Incidence	1	Global	3	Both	22	All ages	536	Gastroesophageal reflux disease	3	Rate	2010	3760.66023693667	4169.25537814324	3327.68783798699
6	Incidence	1	Global	1	Male	22	All ages	536	Gastroesophageal reflux disease	1	Number	2011	127263475.446972	141413025.110728	112129155.168793
6	Incidence	1	Global	2	Female	22	All ages	536	Gastroesophageal reflux disease	1	Number	2011	139380710.301267	154331683.356798	123848402.488865
6	Incidence	1	Global	3	Both	22	All ages	536	Gastroesophageal reflux disease	1	Number	2011	266644185.748238	295580368.56535	235977557.657658
6	Incidence	1	Global	1	Male	22	All ages	536	Gastroesophageal reflux disease	3	Rate	2011	3599.88513360145	4000.13157746771	3171.78261333608
6	Incidence	1	Global	2	Female	22	All ages	536	Gastroesophageal reflux disease	3	Rate	2011	3979.3100984766	4406.1593944325	3535.86373350299
6	Incidence	1	Global	3	Both	22	All ages	536	Gastroesophageal reflux disease	3	Rate	2011	3788.71954191093	4199.87075827763	3352.98060837573
6	Incidence	1	Global	1	Male	22	All ages	536	Gastroesophageal reflux disease	1	Number	2012	129837192.748912	144303130.319541	114390024.407204
6	Incidence	1	Global	2	Female	22	All ages	536	Gastroesophageal reflux disease	1	Number	2012	142251151.60994	157497018.547032	126409864.650445
6	Incidence	1	Global	3	Both	22	All ages	536	Gastroesophageal reflux disease	1	Number	2012	272088344.358852	301623790.190609	240803271.124397
6	Incidence	1	Global	1	Male	22	All ages	536	Gastroesophageal reflux disease	3	Rate	2012	3628.08680088875	4032.31363336485	3196.44108839991
6	Incidence	1	Global	2	Female	22	All ages	536	Gastroesophageal reflux disease	3	Rate	2012	4009.71397218208	4439.4578792354	3563.18662291319
6	Incidence	1	Global	3	Both	22	All ages	536	Gastroesophageal reflux disease	3	Rate	2012	3818.07020132513	4232.52531471418	3379.06350243764
6	Incidence	1	Global	1	Male	22	All ages	536	Gastroesophageal reflux disease	1	Number	2013	132483152.041538	147237257.115482	1.16713e+08
6	Incidence	1	Global	2	Female	22	All ages	536	Gastroesophageal reflux disease	1	Number	2013	145176205.621743	160737506.936857	128997304.64634
6	Incidence	1	Global	3	Both	22	All ages	536	Gastroesophageal reflux disease	1	Number	2013	277659357.663281	307782958.351408	245791990.968975
6	Incidence	1	Global	1	Male	22	All ages	536	Gastroesophageal reflux disease	3	Rate	2013	3656.63811423139	4063.86	3221.3826359257
6	Incidence	1	Global	2	Female	22	All ages	536	Gastroesophageal reflux disease	3	Rate	2013	4040.38031915891	4473.46489596557	3590.10740558687
6	Incidence	1	Global	3	Both	22	All ages	536	Gastroesophageal reflux disease	3	Rate	2013	3847.7127724022	4265.15580077299	3406.10520374534
6	Incidence	1	Global	1	Male	22	All ages	536	Gastroesophageal reflux disease	1	Number	2014	135160490.335489	150119394.925905	119076653.961758
6	Incidence	1	Global	2	Female	22	All ages	536	Gastroesophageal reflux disease	1	Number	2014	148129858.983386	163987070.591648	131520768.851383
6	Incidence	1	Global	3	Both	22	All ages	536	Gastroesophageal reflux disease	1	Number	2014	283290349.318875	314006978.637237	250850874.083724
6	Incidence	1	Global	1	Male	22	All ages	536	Gastroesophageal reflux disease	3	Rate	2014	3685.14542743849	4092.99936991849	3246.62026434381
6	Incidence	1	Global	2	Female	22	All ages	536	Gastroesophageal reflux disease	3	Rate	2014	4071.27674773654	4507.10445558506	3614.7840262855
6	Incidence	1	Global	3	Both	22	All ages	536	Gastroesophageal reflux disease	3	Rate	2014	3877.43687595143	4297.85992075443	3433.4329844821
6	Incidence	1	Global	1	Male	22	All ages	536	Gastroesophageal reflux disease	1	Number	2015	137841465.273179	153047192.01017	121496031.811844
6	Incidence	1	Global	2	Female	22	All ages	536	Gastroesophageal reflux disease	1	Number	2015	151086497.049991	167191606.184687	134058617.492494
6	Incidence	1	Global	3	Both	22	All ages	536	Gastroesophageal reflux disease	1	Number	2015	288927962.323171	320254823.942716	255712980.919337
6	Incidence	1	Global	1	Male	22	All ages	536	Gastroesophageal reflux disease	3	Rate	2015	3712.62104133026	4122.17197667898	3272.37325320679
6	Incidence	1	Global	2	Female	22	All ages	536	Gastroesophageal reflux disease	3	Rate	2015	4101.56469542514	4538.77217810958	3639.30664460889
6	Incidence	1	Global	3	Both	22	All ages	536	Gastroesophageal reflux disease	3	Rate	2015	3906.32644447789	4329.86782476856	3457.25755143143
6	Incidence	1	Global	1	Male	22	All ages	536	Gastroesophageal reflux disease	1	Number	2016	140695816.713795	156100353.828281	124181513.091294
6	Incidence	1	Global	2	Female	22	All ages	536	Gastroesophageal reflux disease	1	Number	2016	154310726.179465	170774603.841269	136902133.724058
6	Incidence	1	Global	3	Both	22	All ages	536	Gastroesophageal reflux disease	1	Number	2016	295006542.89326	327072641.852605	261167449.037318
6	Incidence	1	Global	1	Male	22	All ages	536	Gastroesophageal reflux disease	3	Rate	2016	3743.91291040401	4153.82733948078	3304.46761641647
6	Incidence	1	Global	2	Female	22	All ages	536	Gastroesophageal reflux disease	3	Rate	2016	4138.54403388917	4580.09780243729	3671.65344093751
6	Incidence	1	Global	3	Both	22	All ages	536	Gastroesophageal reflux disease	3	Rate	2016	3940.45453485127	4368.76708622767	3488.45977727009
6	Incidence	1	Global	1	Male	22	All ages	536	Gastroesophageal reflux disease	1	Number	2017	143772059.89132	159304160.697348	127108650.178361
6	Incidence	1	Global	2	Female	22	All ages	536	Gastroesophageal reflux disease	1	Number	2017	157865928.44686	174652164.80993	140046620.54826
6	Incidence	1	Global	3	Both	22	All ages	536	Gastroesophageal reflux disease	1	Number	2017	301637988.33818	334033656.313549	267310430.296539
6	Incidence	1	Global	1	Male	22	All ages	536	Gastroesophageal reflux disease	3	Rate	2017	3780.86132608906	4189.31843030538	3342.65350328865
6	Incidence	1	Global	2	Female	22	All ages	536	Gastroesophageal reflux disease	3	Rate	2017	4184.17597080373	4629.08873647521	3711.88203974961
6	Incidence	1	Global	3	Both	22	All ages	536	Gastroesophageal reflux disease	3	Rate	2017	3981.72806045565	4409.36232802712	3528.59216117999
6	Incidence	1	Global	1	Male	22	All ages	536	Gastroesophageal reflux disease	1	Number	2018	146825123.802843	163052908.30095	129818634.966574
6	Incidence	1	Global	2	Female	22	All ages	536	Gastroesophageal reflux disease	1	Number	2018	161395333.366706	178592457.849236	143020290.782319
6	Incidence	1	Global	3	Both	22	All ages	536	Gastroesophageal reflux disease	1	Number	2018	308220457.169549	340837356.077125	273312933.193538
6	Incidence	1	Global	1	Male	22	All ages	536	Gastroesophageal reflux disease	3	Rate	2018	3817.57913818943	4239.51545231914	3375.39584343962
6	Incidence	1	Global	2	Female	22	All ages	536	Gastroesophageal reflux disease	3	Rate	2018	4229.44	4680.09572726789	3747.91108126186
6	Incidence	1	Global	3	Both	22	All ages	536	Gastroesophageal reflux disease	3	Rate	2018	4022.70121980921	4448.39664647496	3567.10998304204
6	Incidence	1	Global	1	Male	22	All ages	536	Gastroesophageal reflux disease	1	Number	2019	149609386.277056	166390823.395498	132297295.165103
6	Incidence	1	Global	2	Female	22	All ages	536	Gastroesophageal reflux disease	1	Number	2019	164534090.928041	182329404.305151	145657269.751211
6	Incidence	1	Global	3	Both	22	All ages	536	Gastroesophageal reflux disease	1	Number	2019	314143477.205098	347542825.978859	278649940.229519
6	Incidence	1	Global	1	Male	22	All ages	536	Gastroesophageal reflux disease	3	Rate	2019	3848.21529017127	4279.86322695677	3402.91800381997
6	Incidence	1	Global	2	Female	22	All ages	536	Gastroesophageal reflux disease	3	Rate	2019	4265.22834218429	4726.53745171889	3775.88323297543
6	Incidence	1	Global	3	Both	22	All ages	536	Gastroesophageal reflux disease	3	Rate	2019	4055.90903517332	4487.12830372418	3597.65168540979
6	Incidence	1	Global	1	Male	22	All ages	536	Gastroesophageal reflux disease	1	Number	2020	152045405.593544	169011696.859803	134426154.882623
6	Incidence	1	Global	2	Female	22	All ages	536	Gastroesophageal reflux disease	1	Number	2020	167275295.22829	185462528.50744	148127161.340192
6	Incidence	1	Global	3	Both	22	All ages	536	Gastroesophageal reflux disease	1	Number	2020	319320700.821833	353382000.08516	283352224.182601
6	Incidence	1	Global	1	Male	22	All ages	536	Gastroesophageal reflux disease	3	Rate	2020	3872.86242694608	4305.02354166844	3424.06929306026
6	Incidence	1	Global	2	Female	22	All ages	536	Gastroesophageal reflux disease	3	Rate	2020	4293.02270272945	4759.78741691316	3801.59703593079
6	Incidence	1	Global	3	Both	22	All ages	536	Gastroesophageal reflux disease	3	Rate	2020	4082.15104267822	4517.58591409404	3622.33508324153
6	Incidence	1	Global	1	Male	22	All ages	536	Gastroesophageal reflux disease	1	Number	2021	154260782.106808	171448988.069814	136365833.609452
6	Incidence	1	Global	2	Female	22	All ages	536	Gastroesophageal reflux disease	1	Number	2021	169878817.230138	188377236.721511	150535062.971672
6	Incidence	1	Global	3	Both	22	All ages	536	Gastroesophageal reflux disease	1	Number	2021	324139599.336946	358912515.952642	287693228.728479
6	Incidence	1	Global	1	Male	22	All ages	536	Gastroesophageal reflux disease	3	Rate	2021	3896.0730323628	4330.18535055914	3444.11
6	Incidence	1	Global	2	Female	22	All ages	536	Gastroesophageal reflux disease	3	Rate	2021	4320.4594350244	4790.92227628772	3828.49753561017
6	Incidence	1	Global	3	Both	22	All ages	536	Gastroesophageal reflux disease	3	Rate	2021	4107.52867073622	4548.17446735061	3645.6767016316
6	Incidence	1	Global	1	Male	27	Age-standardized	536	Gastroesophageal reflux disease	3	Rate	1990	3599.47092552162	3991.87593005024	3178.6156024054
6	Incidence	1	Global	2	Female	27	Age-standardized	536	Gastroesophageal reflux disease	3	Rate	1990	3879.78198722367	4308.62143262065	3433.46637708052
6	Incidence	1	Global	3	Both	27	Age-standardized	536	Gastroesophageal reflux disease	3	Rate	1990	3739.85850258324	4142.32690225126	3314.19596106393
6	Incidence	1	Global	1	Male	27	Age-standardized	536	Gastroesophageal reflux disease	3	Rate	1991	3591.04227223937	3983.13132459419	3172.97983396654
6	Incidence	1	Global	2	Female	27	Age-standardized	536	Gastroesophageal reflux disease	3	Rate	1991	3873.99144398555	4300.66725764476	3431.28058643033
6	Incidence	1	Global	3	Both	27	Age-standardized	536	Gastroesophageal reflux disease	3	Rate	1991	3732.66310604766	4134.66810372234	3309.80959424887
6	Incidence	1	Global	1	Male	27	Age-standardized	536	Gastroesophageal reflux disease	3	Rate	1992	3584.79494201545	3978.92751637471	3169.21349402465
6	Incidence	1	Global	2	Female	27	Age-standardized	536	Gastroesophageal reflux disease	3	Rate	1992	3869.79434453591	4292.66578886682	3430.65595626815
6	Incidence	1	Global	3	Both	27	Age-standardized	536	Gastroesophageal reflux disease	3	Rate	1992	3727.36645477741	4129.52134765699	3306.97818934001
6	Incidence	1	Global	1	Male	27	Age-standardized	536	Gastroesophageal reflux disease	3	Rate	1993	3580.66788535804	3976.22092018695	3167.12620597354
6	Incidence	1	Global	2	Female	27	Age-standardized	536	Gastroesophageal reflux disease	3	Rate	1993	3867.02309449415	4286.08832962443	3431.3845068941
6	Incidence	1	Global	3	Both	27	Age-standardized	536	Gastroesophageal reflux disease	3	Rate	1993	3723.86055438254	4124.7612050088	3304.94440324416
6	Incidence	1	Global	1	Male	27	Age-standardized	536	Gastroesophageal reflux disease	3	Rate	1994	3578.63434968523	3974.54788532328	3166.59305382594
6	Incidence	1	Global	2	Female	27	Age-standardized	536	Gastroesophageal reflux disease	3	Rate	1994	3865.59769119995	4283.04093798125	3433.62030955682
6	Incidence	1	Global	3	Both	27	Age-standardized	536	Gastroesophageal reflux disease	3	Rate	1994	3722.10902432828	4123.1498762014	3304.0661928744
6	Incidence	1	Global	1	Male	27	Age-standardized	536	Gastroesophageal reflux disease	3	Rate	1995	3579.66903606519	3976.3367418784	3168.73424943543
6	Incidence	1	Global	2	Female	27	Age-standardized	536	Gastroesophageal reflux disease	3	Rate	1995	3866.42926857683	4281.90188811915	3437.15420776294
6	Incidence	1	Global	3	Both	27	Age-standardized	536	Gastroesophageal reflux disease	3	Rate	1995	3723.0449962615	4123.62435208461	3305.34012238216
6	Incidence	1	Global	1	Male	27	Age-standardized	536	Gastroesophageal reflux disease	3	Rate	1996	3583.73168369295	3980.22455495065	3174.38639692606
6	Incidence	1	Global	2	Female	27	Age-standardized	536	Gastroesophageal reflux disease	3	Rate	1996	3869.89810819748	4284.64155908246	3439.67060214637
6	Incidence	1	Global	3	Both	27	Age-standardized	536	Gastroesophageal reflux disease	3	Rate	1996	3726.83213510797	4126.13109161686	3309.91430963765
6	Incidence	1	Global	1	Male	27	Age-standardized	536	Gastroesophageal reflux disease	3	Rate	1997	3589.8549451595	3985.12142416787	3181.97865413618
6	Incidence	1	Global	2	Female	27	Age-standardized	536	Gastroesophageal reflux disease	3	Rate	1997	3875.62776007197	4289.98237065743	3444.62125681351
6	Incidence	1	Global	3	Both	27	Age-standardized	536	Gastroesophageal reflux disease	3	Rate	1997	3732.7861829097	4130.54	3316.8144360452
6	Incidence	1	Global	1	Male	27	Age-standardized	536	Gastroesophageal reflux disease	3	Rate	1998	3596.45704408055	3990.79139791056	3189.93091009205
6	Incidence	1	Global	2	Female	27	Age-standardized	536	Gastroesophageal reflux disease	3	Rate	1998	3882.02722399906	4293.33566811103	3450.40426141071
6	Incidence	1	Global	3	Both	27	Age-standardized	536	Gastroesophageal reflux disease	3	Rate	1998	3739.3131017296	4135.87001299084	3324.44777520861
6	Incidence	1	Global	1	Male	27	Age-standardized	536	Gastroesophageal reflux disease	3	Rate	1999	3602.24166129648	3996.43400687442	3197.07730093319
6	Incidence	1	Global	2	Female	27	Age-standardized	536	Gastroesophageal reflux disease	3	Rate	1999	3887.66801848892	4296.27633729157	3455.52871686384
6	Incidence	1	Global	3	Both	27	Age-standardized	536	Gastroesophageal reflux disease	3	Rate	1999	3745.05643550516	4140.95099337319	3331.38163585511
6	Incidence	1	Global	1	Male	27	Age-standardized	536	Gastroesophageal reflux disease	3	Rate	2000	3606.85827362764	4001.09237246549	3202.64727853323
6	Incidence	1	Global	2	Female	27	Age-standardized	536	Gastroesophageal reflux disease	3	Rate	2000	3892.22723174976	4300.89191550064	3459.2967994436
6	Incidence	1	Global	3	Both	27	Age-standardized	536	Gastroesophageal reflux disease	3	Rate	2000	3749.67635362274	4144.9045501103	3336.83494039097
6	Incidence	1	Global	1	Male	27	Age-standardized	536	Gastroesophageal reflux disease	3	Rate	2001	3608.79319893964	4001.20263452637	3205.52240061935
6	Incidence	1	Global	2	Female	27	Age-standardized	536	Gastroesophageal reflux disease	3	Rate	2001	3891.58277118897	4304.51504647992	3460.7070590442
6	Incidence	1	Global	3	Both	27	Age-standardized	536	Gastroesophageal reflux disease	3	Rate	2001	3750.36316293619	4144.9429352817	3337.12681007875
6	Incidence	1	Global	1	Male	27	Age-standardized	536	Gastroesophageal reflux disease	3	Rate	2002	3608.64985623934	4000.72416382434	3206.2430140744
6	Incidence	1	Global	2	Female	27	Age-standardized	536	Gastroesophageal reflux disease	3	Rate	2002	3885.05930901703	4298.22836422792	3452.50150962063
6	Incidence	1	Global	3	Both	27	Age-standardized	536	Gastroesophageal reflux disease	3	Rate	2002	3747.0678735251	4140.94792074798	3333.71089564102
6	Incidence	1	Global	1	Male	27	Age-standardized	536	Gastroesophageal reflux disease	3	Rate	2003	3607.37251076958	3999.11763857779	3200.83249181752
6	Incidence	1	Global	2	Female	27	Age-standardized	536	Gastroesophageal reflux disease	3	Rate	2003	3875.69420852748	4288.72272649719	3441.29333814401
6	Incidence	1	Global	3	Both	27	Age-standardized	536	Gastroesophageal reflux disease	3	Rate	2003	3741.77113183868	4137.52130586174	3328.4466441677
6	Incidence	1	Global	1	Male	27	Age-standardized	536	Gastroesophageal reflux disease	3	Rate	2004	3605.76675700729	3995.75920046859	3191.74133616249
6	Incidence	1	Global	2	Female	27	Age-standardized	536	Gastroesophageal reflux disease	3	Rate	2004	3866.60487569737	4278.09840895254	3430.2553764134
6	Incidence	1	Global	3	Both	27	Age-standardized	536	Gastroesophageal reflux disease	3	Rate	2004	3736.45056516335	4135.17705164014	3320.75371541847
6	Incidence	1	Global	1	Male	27	Age-standardized	536	Gastroesophageal reflux disease	3	Rate	2005	3605.72409848524	3995.58008154696	3182.55407969425
6	Incidence	1	Global	2	Female	27	Age-standardized	536	Gastroesophageal reflux disease	3	Rate	2005	3861.77533151232	4272.50363245694	3426.03167188001
6	Incidence	1	Global	3	Both	27	Age-standardized	536	Gastroesophageal reflux disease	3	Rate	2005	3734.03616113493	4134.67259828906	3315.28494478692
6	Incidence	1	Global	1	Male	27	Age-standardized	536	Gastroesophageal reflux disease	3	Rate	2006	3603.50849878934	3991.28040796401	3180.97292298312
6	Incidence	1	Global	2	Female	27	Age-standardized	536	Gastroesophageal reflux disease	3	Rate	2006	3857.63361821137	4269.86857217023	3422.08069425823
6	Incidence	1	Global	3	Both	27	Age-standardized	536	Gastroesophageal reflux disease	3	Rate	2006	3730.87357319003	4130.53326919103	3313.46862869068
6	Incidence	1	Global	1	Male	27	Age-standardized	536	Gastroesophageal reflux disease	3	Rate	2007	3597.33420347377	3984.98876738082	3175.9837119262
6	Incidence	1	Global	2	Female	27	Age-standardized	536	Gastroesophageal reflux disease	3	Rate	2007	3850.97070394018	4264.88760114867	3415.90971375866
6	Incidence	1	Global	3	Both	27	Age-standardized	536	Gastroesophageal reflux disease	3	Rate	2007	3724.47357666138	4122.62210230868	3307.64069277887
6	Incidence	1	Global	1	Male	27	Age-standardized	536	Gastroesophageal reflux disease	3	Rate	2008	3590.50854788804	3980.12218499612	3170.39176141163
6	Incidence	1	Global	2	Female	27	Age-standardized	536	Gastroesophageal reflux disease	3	Rate	2008	3844.68817096504	4258.9142433663	3411.34095093296
6	Incidence	1	Global	3	Both	27	Age-standardized	536	Gastroesophageal reflux disease	3	Rate	2008	3717.93708701595	4114.68116722253	3300.60092756461
6	Incidence	1	Global	1	Male	27	Age-standardized	536	Gastroesophageal reflux disease	3	Rate	2009	3586.32882151588	3975.05925626525	3167.05480154048
6	Incidence	1	Global	2	Female	27	Age-standardized	536	Gastroesophageal reflux disease	3	Rate	2009	3841.70956806776	4255.68276655381	3409.62713888726
6	Incidence	1	Global	3	Both	27	Age-standardized	536	Gastroesophageal reflux disease	3	Rate	2009	3714.38981588762	4109.86566243766	3296.15804255767
6	Incidence	1	Global	1	Male	27	Age-standardized	536	Gastroesophageal reflux disease	3	Rate	2010	3588.94813026574	3977.72804799214	3169.82512615513
6	Incidence	1	Global	2	Female	27	Age-standardized	536	Gastroesophageal reflux disease	3	Rate	2010	3845.70302967555	4260.09936580774	3412.99854690421
6	Incidence	1	Global	3	Both	27	Age-standardized	536	Gastroesophageal reflux disease	3	Rate	2010	3717.75057485233	4113.23886007278	3298.16621862151
6	Incidence	1	Global	1	Male	27	Age-standardized	536	Gastroesophageal reflux disease	3	Rate	2011	3597.86808556811	3987.62951831986	3177.06917203643
6	Incidence	1	Global	2	Female	27	Age-standardized	536	Gastroesophageal reflux disease	3	Rate	2011	3855.63569610241	4271.54870892802	3422.00935309465
6	Incidence	1	Global	3	Both	27	Age-standardized	536	Gastroesophageal reflux disease	3	Rate	2011	3727.24087117097	4124.06147401715	3305.86458895558
6	Incidence	1	Global	1	Male	27	Age-standardized	536	Gastroesophageal reflux disease	3	Rate	2012	3609.23928244505	4000.33075012647	3186.71949969769
6	Incidence	1	Global	2	Female	27	Age-standardized	536	Gastroesophageal reflux disease	3	Rate	2012	3867.73041649861	4285.50729400364	3433.06794036624
6	Incidence	1	Global	3	Both	27	Age-standardized	536	Gastroesophageal reflux disease	3	Rate	2012	3739.02707186983	4138.08056864803	3315.86868263923
6	Incidence	1	Global	1	Male	27	Age-standardized	536	Gastroesophageal reflux disease	3	Rate	2013	3621.8731111403	4014.52352683937	3197.80874036604
6	Incidence	1	Global	2	Female	27	Age-standardized	536	Gastroesophageal reflux disease	3	Rate	2013	3881.06142288412	4300.92274027914	3445.19398183967
6	Incidence	1	Global	3	Both	27	Age-standardized	536	Gastroesophageal reflux disease	3	Rate	2013	3752.05380353781	4154.18451372401	3327.29903785243
6	Incidence	1	Global	1	Male	27	Age-standardized	536	Gastroesophageal reflux disease	3	Rate	2014	3634.8423239802	4029.4070304464	3209.56923208458
6	Incidence	1	Global	2	Female	27	Age-standardized	536	Gastroesophageal reflux disease	3	Rate	2014	3895.11243334565	4316.83816460213	3457.9624516236
6	Incidence	1	Global	3	Both	27	Age-standardized	536	Gastroesophageal reflux disease	3	Rate	2014	3765.61007957682	4170.51243204784	3339.54843033295
6	Incidence	1	Global	1	Male	27	Age-standardized	536	Gastroesophageal reflux disease	3	Rate	2015	3647.72168534263	4043.98569765203	3221.39121321333
6	Incidence	1	Global	2	Female	27	Age-standardized	536	Gastroesophageal reflux disease	3	Rate	2015	3909.49555202979	4332.83277512047	3470.90654334406
6	Incidence	1	Global	3	Both	27	Age-standardized	536	Gastroesophageal reflux disease	3	Rate	2015	3779.26702212664	4185.94060345722	3351.99385895483
6	Incidence	1	Global	1	Male	27	Age-standardized	536	Gastroesophageal reflux disease	3	Rate	2016	3664.92806286706	4063.7658190908	3244.37478592909
6	Incidence	1	Global	2	Female	27	Age-standardized	536	Gastroesophageal reflux disease	3	Rate	2016	3930.93443317531	4353.83145577179	3491.84406957559
6	Incidence	1	Global	3	Both	27	Age-standardized	536	Gastroesophageal reflux disease	3	Rate	2016	3798.58538970281	4206.3002217292	3369.5947064892
6	Incidence	1	Global	1	Male	27	Age-standardized	536	Gastroesophageal reflux disease	3	Rate	2017	3687.33389909694	4090.40367400755	3265.32666439481
6	Incidence	1	Global	2	Female	27	Age-standardized	536	Gastroesophageal reflux disease	3	Rate	2017	3960.37154290938	4386.28624464571	3513.92212060437
6	Incidence	1	Global	3	Both	27	Age-standardized	536	Gastroesophageal reflux disease	3	Rate	2017	3824.47377875971	4234.17940003584	3392.10967787814
6	Incidence	1	Global	1	Male	27	Age-standardized	536	Gastroesophageal reflux disease	3	Rate	2018	3708.45480396588	4116.98044986809	3290.35636735468
6	Incidence	1	Global	2	Female	27	Age-standardized	536	Gastroesophageal reflux disease	3	Rate	2018	3988.48701079459	4420.89118788354	3536.38525159869
6	Incidence	1	Global	3	Both	27	Age-standardized	536	Gastroesophageal reflux disease	3	Rate	2018	3849.04719345568	4260.82336528654	3414.52372289568
6	Incidence	1	Global	1	Male	27	Age-standardized	536	Gastroesophageal reflux disease	3	Rate	2019	3722.36942756817	4136.03573723512	3305.65279940457
6	Incidence	1	Global	2	Female	27	Age-standardized	536	Gastroesophageal reflux disease	3	Rate	2019	4006.48539276658	4440.47043710675	3547.79366362704
6	Incidence	1	Global	3	Both	27	Age-standardized	536	Gastroesophageal reflux disease	3	Rate	2019	3864.96303733763	4278.96761948499	3430.51365741124
6	Incidence	1	Global	1	Male	27	Age-standardized	536	Gastroesophageal reflux disease	3	Rate	2020	3730.25645282189	4145.72060276599	3312.44747099302
6	Incidence	1	Global	2	Female	27	Age-standardized	536	Gastroesophageal reflux disease	3	Rate	2020	4016.29972760126	4451.19688647955	3556.2545260666
6	Incidence	1	Global	3	Both	27	Age-standardized	536	Gastroesophageal reflux disease	3	Rate	2020	3873.80759947778	4289.90329332109	3438.82554519824
6	Incidence	1	Global	1	Male	27	Age-standardized	536	Gastroesophageal reflux disease	3	Rate	2021	3737.00684899225	4153.78433001698	3318.12621588402
6	Incidence	1	Global	2	Female	27	Age-standardized	536	Gastroesophageal reflux disease	3	Rate	2021	4025.55439850609	4461.25011754911	3563.9637773448
6	Incidence	1	Global	3	Both	27	Age-standardized	536	Gastroesophageal reflux disease	3	Rate	2021	3881.85801899819	4299.94713875906	3445.55936609571
6	Incidence	6	China	1	Male	22	All ages	536	Gastroesophageal reflux disease	1	Number	1990	9958446.58479288	11344757.9497942	8604376.62321316
6	Incidence	6	China	2	Female	22	All ages	536	Gastroesophageal reflux disease	1	Number	1990	10905300.4001393	12406911.6043973	9480937.11684949
6	Incidence	6	China	3	Both	22	All ages	536	Gastroesophageal reflux disease	1	Number	1990	20863746.9849321	23688720.9056415	18034678.6981663
6	Incidence	6	China	1	Male	22	All ages	536	Gastroesophageal reflux disease	3	Rate	1990	1641.03572942797	1869.48365679379	1417.90080891831
6	Incidence	6	China	2	Female	22	All ages	536	Gastroesophageal reflux disease	3	Rate	1990	1914.49227817898	2178.10932217553	1664.43657983755
6	Incidence	6	China	3	Both	22	All ages	536	Gastroesophageal reflux disease	3	Rate	1990	1773.43820172563	2013.56365347133	1532.96472499759
6	Incidence	6	China	1	Male	22	All ages	536	Gastroesophageal reflux disease	1	Number	1991	10006883.3516576	11364594.4347914	8646996.65465097
6	Incidence	6	China	2	Female	22	All ages	536	Gastroesophageal reflux disease	1	Number	1991	11006389.806284	12516185.8901872	9559575.56499037
6	Incidence	6	China	3	Both	22	All ages	536	Gastroesophageal reflux disease	1	Number	1991	21013273.1579416	23786153.729993	18176754.9591761
6	Incidence	6	China	1	Male	22	All ages	536	Gastroesophageal reflux disease	3	Rate	1991	1624.92613242713	1845.39239966952	1404.1065871748
6	Incidence	6	China	2	Female	22	All ages	536	Gastroesophageal reflux disease	3	Rate	1991	1907.60562146528	2169.28048012562	1656.84665067797
6	Incidence	6	China	3	Both	22	All ages	536	Gastroesophageal reflux disease	3	Rate	1991	1761.66	1994.12717253253	1523.8596951828
6	Incidence	6	China	1	Male	22	All ages	536	Gastroesophageal reflux disease	1	Number	1992	10057783.1382236	11364331.5158983	8677345.40353353
6	Incidence	6	China	2	Female	22	All ages	536	Gastroesophageal reflux disease	1	Number	1992	11100362.6220823	12600231.2551263	9637986.61371163
6	Incidence	6	China	3	Both	22	All ages	536	Gastroesophageal reflux disease	1	Number	1992	21158145.760306	23917750.1852582	18317245.5879725
6	Incidence	6	China	1	Male	22	All ages	536	Gastroesophageal reflux disease	3	Rate	1992	1613.82751878795	1823.47050845492	1392.32856881063
6	Incidence	6	China	2	Female	22	All ages	536	Gastroesophageal reflux disease	3	Rate	1992	1903.96084367007	2161.22191208632	1653.13060023987
6	Incidence	6	China	3	Both	22	All ages	536	Gastroesophageal reflux disease	3	Rate	1992	1754.05824196996	1982.83570389885	1518.5411783129
6	Incidence	6	China	1	Male	22	All ages	536	Gastroesophageal reflux disease	1	Number	1993	10123190.7943058	11445730.4303025	8736511.14155734
6	Incidence	6	China	2	Female	22	All ages	536	Gastroesophageal reflux disease	1	Number	1993	11201155.1942743	12678525.6060992	9724705.03110239
6	Incidence	6	China	3	Both	22	All ages	536	Gastroesophageal reflux disease	1	Number	1993	21324345.9885802	24096550.4033264	18511392.5774709
6	Incidence	6	China	1	Male	22	All ages	536	Gastroesophageal reflux disease	3	Rate	1993	1608.85866485898	1819.04727003567	1388.47641384353
6	Incidence	6	China	2	Female	22	All ages	536	Gastroesophageal reflux disease	3	Rate	1993	1904.85948012712	2156.09990897703	1653.78
6	Incidence	6	China	3	Both	22	All ages	536	Gastroesophageal reflux disease	3	Rate	1993	1751.85152509875	1979.59546315244	1520.7599490231
6	Incidence	6	China	1	Male	22	All ages	536	Gastroesophageal reflux disease	1	Number	1994	10213655.5361846	1.15186e+07	8790880.47198799
6	Incidence	6	China	2	Female	22	All ages	536	Gastroesophageal reflux disease	1	Number	1994	11318692.9837554	12812868.6492077	9828517.82507789
6	Incidence	6	China	3	Both	22	All ages	536	Gastroesophageal reflux disease	1	Number	1994	2.15323e+07	24319305.9892118	18709790.036421
6	Incidence	6	China	1	Male	22	All ages	536	Gastroesophageal reflux disease	3	Rate	1994	1610.90028530037	1816.72	1386.49984916732
6	Incidence	6	China	2	Female	22	All ages	536	Gastroesophageal reflux disease	3	Rate	1994	1911.05633305612	2163.33403616717	1659.45407841057
6	Incidence	6	China	3	Both	22	All ages	536	Gastroesophageal reflux disease	3	Rate	1994	1755.86765793775	1983.13169649864	1525.70051433707
6	Incidence	6	China	1	Male	22	All ages	536	Gastroesophageal reflux disease	1	Number	1995	10337103.4041869	11667307.591329	8879398.39942851
6	Incidence	6	China	2	Female	22	All ages	536	Gastroesophageal reflux disease	1	Number	1995	11460415.5479615	12964917.3235707	9.92033e+06
6	Incidence	6	China	3	Both	22	All ages	536	Gastroesophageal reflux disease	1	Number	1995	21797518.9521485	24554520.1808088	18945775.6406946
6	Incidence	6	China	1	Male	22	All ages	536	Gastroesophageal reflux disease	3	Rate	1995	1620.67605952244	1829.22868747666	1392.13354517542
6	Incidence	6	China	2	Female	22	All ages	536	Gastroesophageal reflux disease	3	Rate	1995	1923.14606790825	2175.61306282784	1664.70708742808
6	Incidence	6	China	3	Both	22	All ages	536	Gastroesophageal reflux disease	3	Rate	1995	1766.77409317078	1990.23981678503	1535.62915350538
6	Incidence	6	China	1	Male	22	All ages	536	Gastroesophageal reflux disease	1	Number	1996	10506896.9579861	11873252.3895151	9045365.79357745
6	Incidence	6	China	2	Female	22	All ages	536	Gastroesophageal reflux disease	1	Number	1996	11624773.1416752	13133181.8410781	10087246.3236842
6	Incidence	6	China	3	Both	22	All ages	536	Gastroesophageal reflux disease	1	Number	1996	22131670.0996612	24942568.2625643	19219307.4577591
6	Incidence	6	China	1	Male	22	All ages	536	Gastroesophageal reflux disease	3	Rate	1996	1639.79568558692	1853.04073315509	1411.69670381034
6	Incidence	6	China	2	Female	22	All ages	536	Gastroesophageal reflux disease	3	Rate	1996	1940.34802121718	2192.12393111261	1683.71186303171
6	Incidence	6	China	3	Both	22	All ages	536	Gastroesophageal reflux disease	3	Rate	1996	1785.02528737892	2011.73769897888	1550.12927915166
6	Incidence	6	China	1	Male	22	All ages	536	Gastroesophageal reflux disease	1	Number	1997	10713604.2795166	12110279.6449364	9246668.41615789
6	Incidence	6	China	2	Female	22	All ages	536	Gastroesophageal reflux disease	1	Number	1997	11802018.5826215	13308632.8510523	10254621.9415973
6	Incidence	6	China	3	Both	22	All ages	536	Gastroesophageal reflux disease	1	Number	1997	22515622.8621381	25383342.7774616	19530247.0228618
6	Incidence	6	China	1	Male	22	All ages	536	Gastroesophageal reflux disease	3	Rate	1997	1666.15420539644	1883.36182973599	1438.01983585892
6	Incidence	6	China	2	Female	22	All ages	536	Gastroesophageal reflux disease	3	Rate	1997	1960.54249564913	2210.82013054113	1703.49012353883
6	Incidence	6	China	3	Both	22	All ages	536	Gastroesophageal reflux disease	3	Rate	1997	1808.49661014867	2038.83719532695	1568.70568282638
6	Incidence	6	China	1	Male	22	All ages	536	Gastroesophageal reflux disease	1	Number	1998	10935837.9078552	12386483.293724	9426496.88865427
6	Incidence	6	China	2	Female	22	All ages	536	Gastroesophageal reflux disease	1	Number	1998	11990763.5804229	13529995.4070556	10413827.4968576
6	Incidence	6	China	3	Both	22	All ages	536	Gastroesophageal reflux disease	1	Number	1998	22926601.4882781	25898895.6012671	19847453.7268064
6	Incidence	6	China	1	Male	22	All ages	536	Gastroesophageal reflux disease	3	Rate	1998	1695.72778316614	1920.66707954804	1461.68705193942
6	Incidence	6	China	2	Female	22	All ages	536	Gastroesophageal reflux disease	3	Rate	1998	1982.92266576385	2237.46672848545	1722.14341833811
6	Incidence	6	China	3	Both	22	All ages	536	Gastroesophageal reflux disease	3	Rate	1998	1834.70524668767	2072.56359680502	1588.29591488212
6	Incidence	6	China	1	Male	22	All ages	536	Gastroesophageal reflux disease	1	Number	1999	11156150.3236833	12656025.7463288	9649599.53639192
6	Incidence	6	China	2	Female	22	All ages	536	Gastroesophageal reflux disease	1	Number	1999	12193508.5012096	13707299.5735536	10541590.2892948
6	Incidence	6	China	3	Both	22	All ages	536	Gastroesophageal reflux disease	1	Number	1999	23349658.8248929	26384029.3833722	20148475.1892919
6	Incidence	6	China	1	Male	22	All ages	536	Gastroesophageal reflux disease	3	Rate	1999	1725.09168774832	1957.0195973939	1492.13155679617
6	Incidence	6	China	2	Female	22	All ages	536	Gastroesophageal reflux disease	3	Rate	1999	2007.30813949157	2256.51001118456	1735.36763342461
6	Incidence	6	China	3	Both	22	All ages	536	Gastroesophageal reflux disease	3	Rate	1999	1861.78455419794	2103.73002671453	1606.53824449344
6	Incidence	6	China	1	Male	22	All ages	536	Gastroesophageal reflux disease	1	Number	2000	11341677.1475213	12925483.3410727	9828951.39912621
6	Incidence	6	China	2	Female	22	All ages	536	Gastroesophageal reflux disease	1	Number	2000	12397315.315975	13970084.6803424	10688986.4546795
6	Incidence	6	China	3	Both	22	All ages	536	Gastroesophageal reflux disease	1	Number	2000	23738992.4634963	26960103.7990192	20486400.3031615
6	Incidence	6	China	1	Male	22	All ages	536	Gastroesophageal reflux disease	3	Rate	2000	1748.48914371197	1992.65655380031	1515.27984723146
6	Incidence	6	China	2	Female	22	All ages	536	Gastroesophageal reflux disease	3	Rate	2000	2030.91524138753	2288.56467530692	1751.05859232444
6	Incidence	6	China	3	Both	22	All ages	536	Gastroesophageal reflux disease	3	Rate	2000	1885.41496042733	2141.24433105187	1627.08529758701
6	Incidence	6	China	1	Male	22	All ages	536	Gastroesophageal reflux disease	1	Number	2001	11505319.6599709	13085243.322808	9946184.83433869
6	Incidence	6	China	2	Female	22	All ages	536	Gastroesophageal reflux disease	1	Number	2001	12607184.5512393	14201338.9049197	10855733.8367726
6	Incidence	6	China	3	Both	22	All ages	536	Gastroesophageal reflux disease	1	Number	2001	24112504.2112103	27302682.5698676	20724600.966664
6	Incidence	6	China	1	Male	22	All ages	536	Gastroesophageal reflux disease	3	Rate	2001	1767.19464228932	2009.86783301393	1527.71457638118
6	Incidence	6	China	2	Female	22	All ages	536	Gastroesophageal reflux disease	3	Rate	2001	2053.94950614569	2313.66748950303	1768.60496189819
6	Incidence	6	China	3	Both	22	All ages	536	Gastroesophageal reflux disease	3	Rate	2001	1906.34983781174	2158.56735712644	1638.5000639272
6	Incidence	6	China	1	Male	22	All ages	536	Gastroesophageal reflux disease	1	Number	2002	11668513.3674773	13237617.864325	10064406.8990524
6	Incidence	6	China	2	Female	22	All ages	536	Gastroesophageal reflux disease	1	Number	2002	12822068.3676178	14426704.1646586	11036691.9691011
6	Incidence	6	China	3	Both	22	All ages	536	Gastroesophageal reflux disease	1	Number	2002	24490581.7350951	27689042.3411504	21055640.9586203
6	Incidence	6	China	1	Male	22	All ages	536	Gastroesophageal reflux disease	3	Rate	2002	1784.74040094459	2024.74048498559	1539.38664151933
6	Incidence	6	China	2	Female	22	All ages	536	Gastroesophageal reflux disease	3	Rate	2002	2076.44997985042	2336.31023584838	1787.31996740343
6	Incidence	6	China	3	Both	22	All ages	536	Gastroesophageal reflux disease	3	Rate	2002	1926.4312202431	2178.02240067606	1656.23848970438
6	Incidence	6	China	1	Male	22	All ages	536	Gastroesophageal reflux disease	1	Number	2003	11832570.2292977	13380723.4002393	10201505.1614682
6	Incidence	6	China	2	Female	22	All ages	536	Gastroesophageal reflux disease	1	Number	2003	13041699.6901484	14689182.9330633	11245780.4027251
6	Incidence	6	China	3	Both	22	All ages	536	Gastroesophageal reflux disease	1	Number	2003	24874269.9194461	28089948.9820294	21427718.2590332
6	Incidence	6	China	1	Male	22	All ages	536	Gastroesophageal reflux disease	3	Rate	2003	1801.78233760233	2037.52444479041	1553.41497753218
6	Incidence	6	China	2	Female	22	All ages	536	Gastroesophageal reflux disease	3	Rate	2003	2098.75392244706	2363.87748765577	1809.74307735566
6	Incidence	6	China	3	Both	22	All ages	536	Gastroesophageal reflux disease	3	Rate	2003	1946.16566098729	2197.76075055664	1676.50707353783
6	Incidence	6	China	1	Male	22	All ages	536	Gastroesophageal reflux disease	1	Number	2004	11999222.0875058	13580712.6426757	10355416.1127256
6	Incidence	6	China	2	Female	22	All ages	536	Gastroesophageal reflux disease	1	Number	2004	13267471.3303208	14919009.9431247	11419930.6081145
6	Incidence	6	China	3	Both	22	All ages	536	Gastroesophageal reflux disease	1	Number	2004	25266693.4178265	28601843.6534366	21818140.3749631
6	Incidence	6	China	1	Male	22	All ages	536	Gastroesophageal reflux disease	3	Rate	2004	1818.71468689693	2058.42023438166	1569.5640297177
6	Incidence	6	China	2	Female	22	All ages	536	Gastroesophageal reflux disease	3	Rate	2004	2121.22874621714	2385.27990515661	1825.84039434678
6	Incidence	6	China	3	Both	22	All ages	536	Gastroesophageal reflux disease	3	Rate	2004	1965.93471566035	2225.43	1697.61190690777
6	Incidence	6	China	1	Male	22	All ages	536	Gastroesophageal reflux disease	1	Number	2005	12161120.0134143	13816105.1283617	10521295.0857046
6	Incidence	6	China	2	Female	22	All ages	536	Gastroesophageal reflux disease	1	Number	2005	13487898.2125319	15163923.5723333	11650669.7135062
6	Incidence	6	China	3	Both	22	All ages	536	Gastroesophageal reflux disease	1	Number	2005	25649018.2259462	29003596.1471837	22102573.2703064
6	Incidence	6	China	1	Male	22	All ages	536	Gastroesophageal reflux disease	3	Rate	2005	1834.01568623047	2083.60360723968	1586.71406953941
6	Incidence	6	China	2	Female	22	All ages	536	Gastroesophageal reflux disease	3	Rate	2005	2141.72774637173	2407.86187343492	1849.99635940647
6	Incidence	6	China	3	Both	22	All ages	536	Gastroesophageal reflux disease	3	Rate	2005	1983.90648932149	2243.3771968648	1709.59520381591
6	Incidence	6	China	1	Male	22	All ages	536	Gastroesophageal reflux disease	1	Number	2006	12244540.2242224	13870545.7447518	10574261.9436822
6	Incidence	6	China	2	Female	22	All ages	536	Gastroesophageal reflux disease	1	Number	2006	13639763.7695214	15356172.7469068	11805593.2002368
6	Incidence	6	China	3	Both	22	All ages	536	Gastroesophageal reflux disease	1	Number	2006	25884303.9937438	29185741.4051322	22346052.7381209
6	Incidence	6	China	1	Male	22	All ages	536	Gastroesophageal reflux disease	3	Rate	2006	1836.09181757867	2079.91440110662	1585.63045048606
6	Incidence	6	China	2	Female	22	All ages	536	Gastroesophageal reflux disease	3	Rate	2006	2149.86823988809	2420.4046809506	1860.77048716501
6	Incidence	6	China	3	Both	22	All ages	536	Gastroesophageal reflux disease	3	Rate	2006	1989.06976745865	2242.76750434726	1717.17415829206
6	Incidence	6	China	1	Male	22	All ages	536	Gastroesophageal reflux disease	1	Number	2007	12216960.5536257	13856369.9966373	10571084.552842
6	Incidence	6	China	2	Female	22	All ages	536	Gastroesophageal reflux disease	1	Number	2007	13692206.1610475	15465321.9983079	11895052.7050898
6	Incidence	6	China	3	Both	22	All ages	536	Gastroesophageal reflux disease	1	Number	2007	25909166.7146731	29265556.4850094	22392795.7261036
6	Incidence	6	China	1	Male	22	All ages	536	Gastroesophageal reflux disease	3	Rate	2007	1820.43660775865	2064.72330673452	1575.18633372311
6	Incidence	6	China	2	Female	22	All ages	536	Gastroesophageal reflux disease	3	Rate	2007	2141.28067677222	2418.57263654463	1860.22955008204
6	Incidence	6	China	3	Both	22	All ages	536	Gastroesophageal reflux disease	3	Rate	2007	1976.98310695875	2233.09037391173	1708.66857107424
6	Incidence	6	China	1	Male	22	All ages	536	Gastroesophageal reflux disease	1	Number	2008	12146708.661438	13783050.4429327	10497252.180213
6	Incidence	6	China	2	Female	22	All ages	536	Gastroesophageal reflux disease	1	Number	2008	13703376.8291165	15560624.9747308	11931022.1280141
6	Incidence	6	China	3	Both	22	All ages	536	Gastroesophageal reflux disease	1	Number	2008	25850085.4905545	29280002.037475	22410725.6849761
6	Incidence	6	China	1	Male	22	All ages	536	Gastroesophageal reflux disease	3	Rate	2008	1798.3175425578	2040.57758297716	1554.11587373128
6	Incidence	6	China	2	Female	22	All ages	536	Gastroesophageal reflux disease	3	Rate	2008	2126.28590324145	2414.46600659016	1851.27830011617
6	Incidence	6	China	3	Both	22	All ages	536	Gastroesophageal reflux disease	3	Rate	2008	1958.45362435658	2218.31088846549	1697.88092028708
6	Incidence	6	China	1	Male	22	All ages	536	Gastroesophageal reflux disease	1	Number	2009	12109733.8586844	13693906.8852683	10470955.6116847
6	Incidence	6	China	2	Female	22	All ages	536	Gastroesophageal reflux disease	1	Number	2009	13742523.283009	15647733.0712822	11991539.1740755
6	Incidence	6	China	3	Both	22	All ages	536	Gastroesophageal reflux disease	1	Number	2009	25852257.1416935	29335131.6218547	22417729.4536404
6	Incidence	6	China	1	Male	22	All ages	536	Gastroesophageal reflux disease	3	Rate	2009	1781.76399604963	2014.85107254685	1540.64258809074
6	Incidence	6	China	2	Female	22	All ages	536	Gastroesophageal reflux disease	3	Rate	2009	2116.46736920411	2409.88614429572	1846.80068178182
6	Incidence	6	China	3	Both	22	All ages	536	Gastroesophageal reflux disease	3	Rate	2009	1945.29577866635	2207.37042022465	1686.85907131567
6	Incidence	6	China	1	Male	22	All ages	536	Gastroesophageal reflux disease	1	Number	2010	12180723.3899406	13779248.5405696	10529997.3463232
6	Incidence	6	China	2	Female	22	All ages	536	Gastroesophageal reflux disease	1	Number	2010	1.38748e+07	15809069.2631034	12104075.9109167
6	Incidence	6	China	3	Both	22	All ages	536	Gastroesophageal reflux disease	1	Number	2010	26055538.6258106	29566978.0477078	22599204.5557348
6	Incidence	6	China	1	Male	22	All ages	536	Gastroesophageal reflux disease	3	Rate	2010	1782.59149301318	2016.52811924279	1541.01551197762
6	Incidence	6	China	2	Female	22	All ages	536	Gastroesophageal reflux disease	3	Rate	2010	2122.75744388265	2418.68586273862	1851.84572222579
6	Incidence	6	China	3	Both	22	All ages	536	Gastroesophageal reflux disease	3	Rate	2010	1948.89694876727	2211.54488989781	1690.37076668258
6	Incidence	6	China	1	Male	22	All ages	536	Gastroesophageal reflux disease	1	Number	2011	12343895.6825196	13976128.6094046	10696252.3927679
6	Incidence	6	China	2	Female	22	All ages	536	Gastroesophageal reflux disease	1	Number	2011	14089551.1182225	16006050.2581456	12278485.7101571
6	Incidence	6	China	3	Both	22	All ages	536	Gastroesophageal reflux disease	1	Number	2011	26433446.800742	29900244.1813744	22931991.380657
6	Incidence	6	China	1	Male	22	All ages	536	Gastroesophageal reflux disease	3	Rate	2011	1798.1376955904	2035.90538492466	1558.12517568677
6	Incidence	6	China	2	Female	22	All ages	536	Gastroesophageal reflux disease	3	Rate	2011	2143.28649122432	2434.82216064162	1867.7892811812
6	Incidence	6	China	3	Both	22	All ages	536	Gastroesophageal reflux disease	3	Rate	2011	1966.97496861176	2224.94751832712	1706.42343263788
6	Incidence	6	China	1	Male	22	All ages	536	Gastroesophageal reflux disease	1	Number	2012	12527642.662708	14175028.2438573	10812174.4716022
6	Incidence	6	China	2	Female	22	All ages	536	Gastroesophageal reflux disease	1	Number	2012	14323557.6809247	16225124.130492	12460662.5774638
6	Incidence	6	China	3	Both	22	All ages	536	Gastroesophageal reflux disease	1	Number	2012	26851200.3436327	30347313.916375	23213397.6505441
6	Incidence	6	China	1	Male	22	All ages	536	Gastroesophageal reflux disease	3	Rate	2012	1815.71382931414	2054.48028062821	1567.07971656032
6	Incidence	6	China	2	Female	22	All ages	536	Gastroesophageal reflux disease	3	Rate	2012	2166.18592337706	2453.76437051832	1884.45583649933
6	Incidence	6	China	3	Both	22	All ages	536	Gastroesophageal reflux disease	3	Rate	2012	1987.22480173939	2245.96793100507	1717.99543236208
6	Incidence	6	China	1	Male	22	All ages	536	Gastroesophageal reflux disease	1	Number	2013	12727649.8500556	14408279.6051496	10958446.6101343
6	Incidence	6	China	2	Female	22	All ages	536	Gastroesophageal reflux disease	1	Number	2013	14572872.2586661	16439090.4191599	12646698.3189729
6	Incidence	6	China	3	Both	22	All ages	536	Gastroesophageal reflux disease	1	Number	2013	27300522.1087217	30758815.999263	23576141.2382561
6	Incidence	6	China	1	Male	22	All ages	536	Gastroesophageal reflux disease	3	Rate	2013	1833.99846169353	2076.16983047182	1579.06404264015
6	Incidence	6	China	2	Female	22	All ages	536	Gastroesophageal reflux disease	3	Rate	2013	2190.19391231099	2470.67257030013	1900.70434828497
6	Incidence	6	China	3	Both	22	All ages	536	Gastroesophageal reflux disease	3	Rate	2013	2008.34719659742	2262.75459629546	1734.36526136289
6	Incidence	6	China	1	Male	22	All ages	536	Gastroesophageal reflux disease	1	Number	2014	12941698.3303026	14639697.1010046	11110129.079305
6	Incidence	6	China	2	Female	22	All ages	536	Gastroesophageal reflux disease	1	Number	2014	14834208.5509088	16730373.2966127	12838178.7784392
6	Incidence	6	China	3	Both	22	All ages	536	Gastroesophageal reflux disease	1	Number	2014	27775906.8812114	31288320.0622187	23948307.8577442
6	Incidence	6	China	1	Male	22	All ages	536	Gastroesophageal reflux disease	3	Rate	2014	1853.16235426776	2096.30412122505	1590.89421151282
6	Incidence	6	China	2	Female	22	All ages	536	Gastroesophageal reflux disease	3	Rate	2014	2215.50767228076	2498.7022577956	1917.39811963217
6	Incidence	6	China	3	Both	22	All ages	536	Gastroesophageal reflux disease	3	Rate	2014	2030.52129084898	2287.29165578415	1750.70967774049
6	Incidence	6	China	1	Male	22	All ages	536	Gastroesophageal reflux disease	1	Number	2015	13158340.9007449	14914889.4031178	11244424.7210643
6	Incidence	6	China	2	Female	22	All ages	536	Gastroesophageal reflux disease	1	Number	2015	15095139.5367773	17032812.3589213	13039411.1590273
6	Incidence	6	China	3	Both	22	All ages	536	Gastroesophageal reflux disease	1	Number	2015	28253480.4375222	31936241.2251808	24330160.2729136
6	Incidence	6	China	1	Male	22	All ages	536	Gastroesophageal reflux disease	3	Rate	2015	1870.88950307323	2120.64045416331	1598.76357797855
6	Incidence	6	China	2	Female	22	All ages	536	Gastroesophageal reflux disease	3	Rate	2015	2239.49916844535	2526.97028875783	1934.51344894907
6	Incidence	6	China	3	Both	22	All ages	536	Gastroesophageal reflux disease	3	Rate	2015	2051.27648486106	2318.65453832948	1766.43319222534
6	Incidence	6	China	1	Male	22	All ages	536	Gastroesophageal reflux disease	1	Number	2016	13523712.4345306	15320011.2320114	11565219.3548446
6	Incidence	6	China	2	Female	22	All ages	536	Gastroesophageal reflux disease	1	Number	2016	15517715.6637193	17525279.2572054	13429807.762021
6	Incidence	6	China	3	Both	22	All ages	536	Gastroesophageal reflux disease	1	Number	2016	29041428.0982499	32677013.8136384	25056398.3472275
6	Incidence	6	China	1	Male	22	All ages	536	Gastroesophageal reflux disease	3	Rate	2016	1907.61153403996	2160.99168547731	1631.35277696914
6	Incidence	6	China	2	Female	22	All ages	536	Gastroesophageal reflux disease	3	Rate	2016	2285.6978401598	2581.40397816716	1978.15730489132
6	Incidence	6	China	3	Both	22	All ages	536	Gastroesophageal reflux disease	3	Rate	2016	2092.56426842667	2354.52441505192	1805.42512232836
6	Incidence	6	China	1	Male	22	All ages	536	Gastroesophageal reflux disease	1	Number	2017	14058137.1241742	15972907.9869796	12043435.7848726
6	Incidence	6	China	2	Female	22	All ages	536	Gastroesophageal reflux disease	1	Number	2017	16122184.5394454	18151515.2183921	13985221.1628747
6	Incidence	6	China	3	Both	22	All ages	536	Gastroesophageal reflux disease	1	Number	2017	30180321.6636196	34026162.3378814	26028671.5774464
6	Incidence	6	China	1	Male	22	All ages	536	Gastroesophageal reflux disease	3	Rate	2017	1967.43806608427	2235.41049017128	1685.48035919033
6	Incidence	6	China	2	Female	22	All ages	536	Gastroesophageal reflux disease	3	Rate	2017	2358.3444105089	2655.19380161087	2045.75056677343
6	Incidence	6	China	3	Both	22	All ages	536	Gastroesophageal reflux disease	3	Rate	2017	2158.56922562259	2433.63300455229	1861.63322171082
6	Incidence	6	China	1	Male	22	All ages	536	Gastroesophageal reflux disease	1	Number	2018	1.45707e+07	16513975.8617818	12492684.9953819
6	Incidence	6	China	2	Female	22	All ages	536	Gastroesophageal reflux disease	1	Number	2018	16697302.9922109	18804953.4265541	14465210.6910359
6	Incidence	6	China	3	Both	22	All ages	536	Gastroesophageal reflux disease	1	Number	2018	31268028.8321108	35392293.7343104	26933961.5194251
6	Incidence	6	China	1	Male	22	All ages	536	Gastroesophageal reflux disease	3	Rate	2018	2025.15906734395	2295.2479047273	1736.33589512676
6	Incidence	6	China	2	Female	22	All ages	536	Gastroesophageal reflux disease	3	Rate	2018	2428.04229782367	2734.5267885225	2103.46206337337
6	Incidence	6	China	3	Both	22	All ages	536	Gastroesophageal reflux disease	3	Rate	2018	2222.04844694026	2515.13748270613	1914.04989695818
6	Incidence	6	China	1	Male	22	All ages	536	Gastroesophageal reflux disease	1	Number	2019	14866527.7425113	16822502.4065257	12740926.8019968
6	Incidence	6	China	2	Female	22	All ages	536	Gastroesophageal reflux disease	1	Number	2019	17029965.9548036	19255569.2555783	14747295.7321264
6	Incidence	6	China	3	Both	22	All ages	536	Gastroesophageal reflux disease	1	Number	2019	31896493.6973149	36136539.4175539	27436456.0304929
6	Incidence	6	China	1	Male	22	All ages	536	Gastroesophageal reflux disease	3	Rate	2019	2054.89930860669	2325.26042146037	1761.0919059173
6	Incidence	6	China	2	Female	22	All ages	536	Gastroesophageal reflux disease	3	Rate	2019	2464.8878445461	2787.01782046152	2134.49810096606
6	Incidence	6	China	3	Both	22	All ages	536	Gastroesophageal reflux disease	3	Rate	2019	2255.17368103242	2554.9570868637	1939.83621296843
6	Incidence	6	China	1	Male	22	All ages	536	Gastroesophageal reflux disease	1	Number	2020	14980234.9054426	16952532.4274142	12850791.4571146
6	Incidence	6	China	2	Female	22	All ages	536	Gastroesophageal reflux disease	1	Number	2020	17164123.5241849	19401572.7238953	14869753.952455
6	Incidence	6	China	3	Both	22	All ages	536	Gastroesophageal reflux disease	1	Number	2020	32144358.4296275	36447254.2625605	27636843.6785895
6	Incidence	6	China	1	Male	22	All ages	536	Gastroesophageal reflux disease	3	Rate	2020	2062.52578666565	2334.07790341953	1769.33732525995
6	Incidence	6	China	2	Female	22	All ages	536	Gastroesophageal reflux disease	3	Rate	2020	2476.14434236497	2798.92500572862	2145.15218734299
6	Incidence	6	China	3	Both	22	All ages	536	Gastroesophageal reflux disease	3	Rate	2020	2264.50884657206	2567.63966502927	1946.9630149411
6	Incidence	6	China	1	Male	22	All ages	536	Gastroesophageal reflux disease	1	Number	2021	15091095.9385525	17086795.2410047	12967303.4850733
6	Incidence	6	China	2	Female	22	All ages	536	Gastroesophageal reflux disease	1	Number	2021	17296769.9710963	19545902.7425721	15002039.3316604
6	Incidence	6	China	3	Both	22	All ages	536	Gastroesophageal reflux disease	1	Number	2021	32387865.9096488	36711149.9645939	27851900.2556569
6	Incidence	6	China	1	Male	22	All ages	536	Gastroesophageal reflux disease	3	Rate	2021	2072.65819267945	2346.7537604364	1780.96991197551
6	Incidence	6	China	2	Female	22	All ages	536	Gastroesophageal reflux disease	3	Rate	2021	2490.02473320877	2813.80751106866	2159.67773444567
6	Incidence	6	China	3	Both	22	All ages	536	Gastroesophageal reflux disease	3	Rate	2021	2276.43352945134	2580.3025403789	1957.61584841017
6	Incidence	6	China	1	Male	27	Age-standardized	536	Gastroesophageal reflux disease	3	Rate	1990	1723.16392646059	1946.81295202214	1499.00334777157
6	Incidence	6	China	2	Female	27	Age-standardized	536	Gastroesophageal reflux disease	3	Rate	1990	1984.69039887274	2242.5332000202	1731.34606613254
6	Incidence	6	China	3	Both	27	Age-standardized	536	Gastroesophageal reflux disease	3	Rate	1990	1851.78875796251	2089.2964268583	1617.15689047921
6	Incidence	6	China	1	Male	27	Age-standardized	536	Gastroesophageal reflux disease	3	Rate	1991	1694.92772255132	1910.65456835372	1468.91263929814
6	Incidence	6	China	2	Female	27	Age-standardized	536	Gastroesophageal reflux disease	3	Rate	1991	1961.54840208306	2213.52127799221	1710.61675105916
6	Incidence	6	China	3	Both	27	Age-standardized	536	Gastroesophageal reflux disease	3	Rate	1991	1825.8802743068	2062.64080759136	1589.15284907676
6	Incidence	6	China	1	Male	27	Age-standardized	536	Gastroesophageal reflux disease	3	Rate	1992	1670.99464575786	1879.39711560518	1446.14091425015
6	Incidence	6	China	2	Female	27	Age-standardized	536	Gastroesophageal reflux disease	3	Rate	1992	1940.85995680884	2189.72022557245	1695.96524814956
6	Incidence	6	China	3	Both	27	Age-standardized	536	Gastroesophageal reflux disease	3	Rate	1992	1803.41704149387	2031.98256428337	1567.03128578066
6	Incidence	6	China	1	Male	27	Age-standardized	536	Gastroesophageal reflux disease	3	Rate	1993	1652.27556214197	1855.20489745295	1430.3745755944
6	Incidence	6	China	2	Female	27	Age-standardized	536	Gastroesophageal reflux disease	3	Rate	1993	1923.57971440471	2168.76052343139	1679.31949928386
6	Incidence	6	China	3	Both	27	Age-standardized	536	Gastroesophageal reflux disease	3	Rate	1993	1785.32981774875	2005.82443287228	1550.01185743003
6	Incidence	6	China	1	Male	27	Age-standardized	536	Gastroesophageal reflux disease	3	Rate	1994	1639.70135852407	1839.67549885795	1418.18521489036
6	Incidence	6	China	2	Female	27	Age-standardized	536	Gastroesophageal reflux disease	3	Rate	1994	1910.68577369565	2150.34012105732	1663.52685363951
6	Incidence	6	China	3	Both	27	Age-standardized	536	Gastroesophageal reflux disease	3	Rate	1994	1772.5709844555	1989.38104837018	1537.6635666955
6	Incidence	6	China	1	Male	27	Age-standardized	536	Gastroesophageal reflux disease	3	Rate	1995	1634.19437506988	1842.27360990723	1410.81422771443
6	Incidence	6	China	2	Female	27	Age-standardized	536	Gastroesophageal reflux disease	3	Rate	1995	1903.1697838348	2142.08588975516	1650.8950196965
6	Incidence	6	China	3	Both	27	Age-standardized	536	Gastroesophageal reflux disease	3	Rate	1995	1766.0968458401	1983.25678607859	1530.3538980184
6	Incidence	6	China	1	Male	27	Age-standardized	536	Gastroesophageal reflux disease	3	Rate	1996	1636.60997775689	1840.21378714934	1422.90088037541
6	Incidence	6	China	2	Female	27	Age-standardized	536	Gastroesophageal reflux disease	3	Rate	1996	1900.0168533249	2135.68034821686	1651.31280744629
6	Incidence	6	China	3	Both	27	Age-standardized	536	Gastroesophageal reflux disease	3	Rate	1996	1765.87194448345	1984.14673106681	1532.94252499719
6	Incidence	6	China	1	Male	27	Age-standardized	536	Gastroesophageal reflux disease	3	Rate	1997	1644.75537202741	1852.24313448352	1436.66092230672
6	Incidence	6	China	2	Female	27	Age-standardized	536	Gastroesophageal reflux disease	3	Rate	1997	1898.91338827221	2129.08904304538	1650.32916515787
6	Incidence	6	China	3	Both	27	Age-standardized	536	Gastroesophageal reflux disease	3	Rate	1997	1769.60556388384	1986.19678082639	1537.06273773061
6	Incidence	6	China	1	Male	27	Age-standardized	536	Gastroesophageal reflux disease	3	Rate	1998	1654.96027402875	1864.12909004625	1452.08226998823
6	Incidence	6	China	2	Female	27	Age-standardized	536	Gastroesophageal reflux disease	3	Rate	1998	1898.83445966457	2129.72828251853	1651.77167555577
6	Incidence	6	China	3	Both	27	Age-standardized	536	Gastroesophageal reflux disease	3	Rate	1998	1774.88119186072	1990.97353291603	1542.46951095781
6	Incidence	6	China	1	Male	27	Age-standardized	536	Gastroesophageal reflux disease	3	Rate	1999	1663.59523124965	1876.70556718203	1460.78846454501
6	Incidence	6	China	2	Female	27	Age-standardized	536	Gastroesophageal reflux disease	3	Rate	1999	1898.82091188369	2125.75	1651.62265619151
6	Incidence	6	China	3	Both	27	Age-standardized	536	Gastroesophageal reflux disease	3	Rate	1999	1779.36646117108	1997.3915596826	1547.49610535174
6	Incidence	6	China	1	Male	27	Age-standardized	536	Gastroesophageal reflux disease	3	Rate	2000	1667.04321646393	1882.1509915497	1465.97023093771
6	Incidence	6	China	2	Female	27	Age-standardized	536	Gastroesophageal reflux disease	3	Rate	2000	1897.95818424011	2125.62244088117	1648.97530672446
6	Incidence	6	China	3	Both	27	Age-standardized	536	Gastroesophageal reflux disease	3	Rate	2000	1780.78045511906	2002.29371961167	1551.41527376887
6	Incidence	6	China	1	Male	27	Age-standardized	536	Gastroesophageal reflux disease	3	Rate	2001	1666.15496839035	1881.03155237173	1461.69910112005
6	Incidence	6	China	2	Female	27	Age-standardized	536	Gastroesophageal reflux disease	3	Rate	2001	1896.23092332889	2123.64419833714	1647.13335335256
6	Incidence	6	China	3	Both	27	Age-standardized	536	Gastroesophageal reflux disease	3	Rate	2001	1779.57391350358	2000.65525494151	1547.76289896602
6	Incidence	6	China	1	Male	27	Age-standardized	536	Gastroesophageal reflux disease	3	Rate	2002	1664.26704189166	1880.57002884623	1453.65273076023
6	Incidence	6	China	2	Female	27	Age-standardized	536	Gastroesophageal reflux disease	3	Rate	2002	1894.16	2122.46050987856	1646.13696289409
6	Incidence	6	China	3	Both	27	Age-standardized	536	Gastroesophageal reflux disease	3	Rate	2002	1777.69054064561	1997.39134851675	1545.3024101639
6	Incidence	6	China	1	Male	27	Age-standardized	536	Gastroesophageal reflux disease	3	Rate	2003	1661.4623565241	1877.14948964403	1445.08947555662
6	Incidence	6	China	2	Female	27	Age-standardized	536	Gastroesophageal reflux disease	3	Rate	2003	1891.5503867507	2120.95098526789	1641.11384017595
6	Incidence	6	China	3	Both	27	Age-standardized	536	Gastroesophageal reflux disease	3	Rate	2003	1775.07114424626	1995.43061938523	1544.70487627757
6	Incidence	6	China	1	Male	27	Age-standardized	536	Gastroesophageal reflux disease	3	Rate	2004	1657.81892754517	1872.19339538697	1445.75766080286
6	Incidence	6	China	2	Female	27	Age-standardized	536	Gastroesophageal reflux disease	3	Rate	2004	1888.25423620721	2117.06743466835	1638.22466567251
6	Incidence	6	China	3	Both	27	Age-standardized	536	Gastroesophageal reflux disease	3	Rate	2004	1771.69602253032	1994.13445066803	1541.35699609264
6	Incidence	6	China	1	Male	27	Age-standardized	536	Gastroesophageal reflux disease	3	Rate	2005	1653.39278253179	1870.34570868735	1441.62829836301
6	Incidence	6	China	2	Female	27	Age-standardized	536	Gastroesophageal reflux disease	3	Rate	2005	1884.11491688706	2118.89580029105	1634.70894614983
6	Incidence	6	China	3	Both	27	Age-standardized	536	Gastroesophageal reflux disease	3	Rate	2005	1767.50769726621	1990.46301415191	1534.57351683767
6	Incidence	6	China	1	Male	27	Age-standardized	536	Gastroesophageal reflux disease	3	Rate	2006	1638.66392465524	1848.89282135932	1427.8623922119
6	Incidence	6	China	2	Female	27	Age-standardized	536	Gastroesophageal reflux disease	3	Rate	2006	1870.31710714563	2101.27142333526	1623.84284935932
6	Incidence	6	China	3	Both	27	Age-standardized	536	Gastroesophageal reflux disease	3	Rate	2006	1753.31038899915	1973.75048910994	1523.61139544263
6	Incidence	6	China	1	Male	27	Age-standardized	536	Gastroesophageal reflux disease	3	Rate	2007	1610.49581224057	1817.10866491142	1400.85396659604
6	Incidence	6	China	2	Female	27	Age-standardized	536	Gastroesophageal reflux disease	3	Rate	2007	1844.10856816478	2070.4950660285	1605.48000799709
6	Incidence	6	China	3	Both	27	Age-standardized	536	Gastroesophageal reflux disease	3	Rate	2007	1726.14267691289	1944.6049770358	1501.32752104366
6	Incidence	6	China	1	Male	27	Age-standardized	536	Gastroesophageal reflux disease	3	Rate	2008	1578.45443921176	1777.87868986339	1374.62570964619
6	Incidence	6	China	2	Female	27	Age-standardized	536	Gastroesophageal reflux disease	3	Rate	2008	1814.32615678876	2046.60660246862	1581.44736160737
6	Incidence	6	China	3	Both	27	Age-standardized	536	Gastroesophageal reflux disease	3	Rate	2008	1695.23155008558	1912.46891471769	1475.77373659717
6	Incidence	6	China	1	Male	27	Age-standardized	536	Gastroesophageal reflux disease	3	Rate	2009	1552.06419674032	1749.71113189779	1353.36436490573
6	Incidence	6	China	2	Female	27	Age-standardized	536	Gastroesophageal reflux disease	3	Rate	2009	1789.80276392009	2024.95733714761	1561.13611761992
6	Incidence	6	China	3	Both	27	Age-standardized	536	Gastroesophageal reflux disease	3	Rate	2009	1669.79041034616	1887.29	1456.37601465792
6	Incidence	6	China	1	Male	27	Age-standardized	536	Gastroesophageal reflux disease	3	Rate	2010	1540.79611081378	1737.02002525438	1342.77761902688
6	Incidence	6	China	2	Female	27	Age-standardized	536	Gastroesophageal reflux disease	3	Rate	2010	1779.32347804445	2017.40878802558	1553.91357679454
6	Incidence	6	China	3	Both	27	Age-standardized	536	Gastroesophageal reflux disease	3	Rate	2010	1658.95747452557	1875.50215050631	1447.09270817955
6	Incidence	6	China	1	Male	27	Age-standardized	536	Gastroesophageal reflux disease	3	Rate	2011	1542.51596117137	1736.20291230433	1345.65478644629
6	Incidence	6	China	2	Female	27	Age-standardized	536	Gastroesophageal reflux disease	3	Rate	2011	1781.23773147487	2019.29611074052	1553.52693569787
6	Incidence	6	China	3	Both	27	Age-standardized	536	Gastroesophageal reflux disease	3	Rate	2011	1660.83716850683	1877.26946196501	1446.00180558505
6	Incidence	6	China	1	Male	27	Age-standardized	536	Gastroesophageal reflux disease	3	Rate	2012	1548.14367875676	1743.53300100322	1345.02985530166
6	Incidence	6	China	2	Female	27	Age-standardized	536	Gastroesophageal reflux disease	3	Rate	2012	1787.37959035718	2021.28456382335	1556.99824542026
6	Incidence	6	China	3	Both	27	Age-standardized	536	Gastroesophageal reflux disease	3	Rate	2012	1666.78	1878.25768407679	1447.88214671738
6	Incidence	6	China	1	Male	27	Age-standardized	536	Gastroesophageal reflux disease	3	Rate	2013	1556.67282635133	1750.98916406357	1347.03
6	Incidence	6	China	2	Female	27	Age-standardized	536	Gastroesophageal reflux disease	3	Rate	2013	1796.65579327596	2027.35148700899	1561.5547499064
6	Incidence	6	China	3	Both	27	Age-standardized	536	Gastroesophageal reflux disease	3	Rate	2013	1675.72266990403	1885.29020175079	1452.49587812281
6	Incidence	6	China	1	Male	27	Age-standardized	536	Gastroesophageal reflux disease	3	Rate	2014	1567.1181630397	1768.3118167601	1352.94723136671
6	Incidence	6	China	2	Female	27	Age-standardized	536	Gastroesophageal reflux disease	3	Rate	2014	1808.00425386958	2040.08853200206	1571.49501938021
6	Incidence	6	China	3	Both	27	Age-standardized	536	Gastroesophageal reflux disease	3	Rate	2014	1686.63729782628	1894.87494791302	1461.3443949133
6	Incidence	6	China	1	Male	27	Age-standardized	536	Gastroesophageal reflux disease	3	Rate	2015	1578.48950692185	1781.73468372626	1363.39348296306
6	Incidence	6	China	2	Female	27	Age-standardized	536	Gastroesophageal reflux disease	3	Rate	2015	1820.3612606872	2055.13506336591	1584.48618452282
6	Incidence	6	China	3	Both	27	Age-standardized	536	Gastroesophageal reflux disease	3	Rate	2015	1698.49	1917.49830489065	1471.90877309817
6	Incidence	6	China	1	Male	27	Age-standardized	536	Gastroesophageal reflux disease	3	Rate	2016	1606.44225823113	1811.80954312288	1388.47792291323
6	Incidence	6	China	2	Female	27	Age-standardized	536	Gastroesophageal reflux disease	3	Rate	2016	1851.88911355523	2084.99724858302	1615.31307195952
6	Incidence	6	China	3	Both	27	Age-standardized	536	Gastroesophageal reflux disease	3	Rate	2016	1728.18840875735	1942.35782118325	1498.70598452378
6	Incidence	6	China	1	Male	27	Age-standardized	536	Gastroesophageal reflux disease	3	Rate	2017	1652.95727188456	1860.22955609121	1428.10440638619
6	Incidence	6	China	2	Female	27	Age-standardized	536	Gastroesophageal reflux disease	3	Rate	2017	1904.97067698253	2148.6112117131	1660.16234220861
6	Incidence	6	China	3	Both	27	Age-standardized	536	Gastroesophageal reflux disease	3	Rate	2017	1777.87752837571	2003.43492455369	1542.06905701789
6	Incidence	6	China	1	Male	27	Age-standardized	536	Gastroesophageal reflux disease	3	Rate	2018	1696.53196170119	1914.57299376957	1468.1181017541
6	Incidence	6	China	2	Female	27	Age-standardized	536	Gastroesophageal reflux disease	3	Rate	2018	1954.84835896539	2213.21464636831	1700.81457567566
6	Incidence	6	China	3	Both	27	Age-standardized	536	Gastroesophageal reflux disease	3	Rate	2018	1824.45335553998	2060.15677922194	1584.91651784735
6	Incidence	6	China	1	Male	27	Age-standardized	536	Gastroesophageal reflux disease	3	Rate	2019	1715.71433344684	1939.14559053878	1488.87227164844
6	Incidence	6	China	2	Female	27	Age-standardized	536	Gastroesophageal reflux disease	3	Rate	2019	1976.83001052146	2238.88463084213	1722.06714004719
6	Incidence	6	China	3	Both	27	Age-standardized	536	Gastroesophageal reflux disease	3	Rate	2019	1844.87649462932	2084.90333752367	1605.74169483334
6	Incidence	6	China	1	Male	27	Age-standardized	536	Gastroesophageal reflux disease	3	Rate	2020	1715.56995945234	1938.94007850979	1488.59277464717
6	Incidence	6	China	2	Female	27	Age-standardized	536	Gastroesophageal reflux disease	3	Rate	2020	1976.66308594442	2238.64981168035	1721.83054521283
6	Incidence	6	China	3	Both	27	Age-standardized	536	Gastroesophageal reflux disease	3	Rate	2020	1844.58145079052	2084.49660782389	1605.37351925539
6	Incidence	6	China	1	Male	27	Age-standardized	536	Gastroesophageal reflux disease	3	Rate	2021	1715.43575153821	1938.75692163568	1488.37845745624
6	Incidence	6	China	2	Female	27	Age-standardized	536	Gastroesophageal reflux disease	3	Rate	2021	1976.51921265398	2238.43136410784	1721.62210816739
6	Incidence	6	China	3	Both	27	Age-standardized	536	Gastroesophageal reflux disease	3	Rate	2021	1844.30993186486	2084.11930927689	1605.06246776692
