# Supplementary material for: Burden of Gastroesophageal reflux disease in China and Global from 1990 to 2021 with forecast to 2041: An analysis and comparison
Source: Research Square preprint supplement (doi:10.21203/rs.3.rs-7227485/v1), 2025-07-29
Supplement: Supplementary file 5 [file 8fd3c242d4f8e6c865ac96c7.xlsx]

## Sheet: Table S2
measure_name	location_name	sex_name	age_name	cause_name	metric_name	year	val	upper	lower
DALYs (Disability-Adjusted Life Years)	Global	Both	95+ years	Gastroesophageal reflux disease	Number	1990	1176.1036332457	2159.23977114907	569.234532122449
DALYs (Disability-Adjusted Life Years)	Global	Both	95+ years	Gastroesophageal reflux disease	Rate	1990	115.520992144318	212.088045296006	55.9121968972395
DALYs (Disability-Adjusted Life Years)	Global	Both	<5 years	Gastroesophageal reflux disease	Number	1990	0	0	0
DALYs (Disability-Adjusted Life Years)	Global	Both	<5 years	Gastroesophageal reflux disease	Rate	1990	0	0	0
DALYs (Disability-Adjusted Life Years)	Global	Both	5-9 years	Gastroesophageal reflux disease	Number	1990	1170.68290443994	2457.79581059812	425.161335059621
DALYs (Disability-Adjusted Life Years)	Global	Both	5-9 years	Gastroesophageal reflux disease	Rate	1990	0.200620614074199	0.421193905643546	0.0728601466688998
DALYs (Disability-Adjusted Life Years)	Global	Both	10-14 years	Gastroesophageal reflux disease	Number	1990	24390.5186956712	47417.3428196203	11140.6049403231
DALYs (Disability-Adjusted Life Years)	Global	Both	10-14 years	Gastroesophageal reflux disease	Rate	1990	4.55316585992152	8.85176035771669	2.07970247398448
DALYs (Disability-Adjusted Life Years)	Global	Both	15-19 years	Gastroesophageal reflux disease	Number	1990	128684.825978424	226240.34423194	60965.6993807358
DALYs (Disability-Adjusted Life Years)	Global	Both	15-19 years	Gastroesophageal reflux disease	Rate	1990	24.7745506765392	43.5560512332019	11.737186551365
DALYs (Disability-Adjusted Life Years)	Global	Both	20-24 years	Gastroesophageal reflux disease	Number	1990	292360.651501889	547708.400627082	136213.002425968
DALYs (Disability-Adjusted Life Years)	Global	Both	20-24 years	Gastroesophageal reflux disease	Rate	1990	59.4122815552177	111.302959345075	27.6806239486741
DALYs (Disability-Adjusted Life Years)	Global	Both	25-29 years	Gastroesophageal reflux disease	Number	1990	387427.005035109	721925.122572016	182583.061058671
DALYs (Disability-Adjusted Life Years)	Global	Both	25-29 years	Gastroesophageal reflux disease	Rate	1990	87.5304570255623	163.102817035785	41.2505544835299
DALYs (Disability-Adjusted Life Years)	Global	Both	30-34 years	Gastroesophageal reflux disease	Number	1990	407905.058088838	759298.169475058	194113.033828199
DALYs (Disability-Adjusted Life Years)	Global	Both	30-34 years	Gastroesophageal reflux disease	Rate	1990	105.833227645311	197.004117568997	50.363702265216
DALYs (Disability-Adjusted Life Years)	Global	Both	35-39 years	Gastroesophageal reflux disease	Number	1990	398894.429352837	756015.002404783	188082.218536857
DALYs (Disability-Adjusted Life Years)	Global	Both	35-39 years	Gastroesophageal reflux disease	Rate	1990	113.24363096085	214.627925669688	53.3953642341943
DALYs (Disability-Adjusted Life Years)	Global	Both	40-44 years	Gastroesophageal reflux disease	Number	1990	343458.786869473	656231.342439605	162278.43143154
DALYs (Disability-Adjusted Life Years)	Global	Both	40-44 years	Gastroesophageal reflux disease	Rate	1990	119.888587977052	229.065762877886	56.6453174215976
DALYs (Disability-Adjusted Life Years)	Global	Both	45-49 years	Gastroesophageal reflux disease	Number	1990	286646.16955734	555517.729278952	141410.380118853
DALYs (Disability-Adjusted Life Years)	Global	Both	45-49 years	Gastroesophageal reflux disease	Rate	1990	123.450359232184	239.245699132273	60.9014320749193
DALYs (Disability-Adjusted Life Years)	Global	Both	50-54 years	Gastroesophageal reflux disease	Number	1990	271380.162480224	503961.923515646	130512.935699921
DALYs (Disability-Adjusted Life Years)	Global	Both	50-54 years	Gastroesophageal reflux disease	Rate	1990	127.665375877448	237.078818899429	61.3972032469905
DALYs (Disability-Adjusted Life Years)	Global	Both	55-59 years	Gastroesophageal reflux disease	Number	1990	251970.873813471	472392.595131753	122589.578441262
DALYs (Disability-Adjusted Life Years)	Global	Both	55-59 years	Gastroesophageal reflux disease	Rate	1990	136.05341781515	255.071652312567	66.1930916181964
DALYs (Disability-Adjusted Life Years)	Global	Both	60-64 years	Gastroesophageal reflux disease	Number	1990	222046.244702943	391788.482929092	109224.439754906
DALYs (Disability-Adjusted Life Years)	Global	Both	60-64 years	Gastroesophageal reflux disease	Rate	1990	138.252474844436	243.938948181526	68.0063251230142
DALYs (Disability-Adjusted Life Years)	Global	Both	65-69 years	Gastroesophageal reflux disease	Number	1990	176299.797167282	311438.23899208	86861.3096733377
DALYs (Disability-Adjusted Life Years)	Global	Both	65-69 years	Gastroesophageal reflux disease	Rate	1990	142.626463201024	251.953406905218	70.2707637034998
DALYs (Disability-Adjusted Life Years)	Global	Both	70-74 years	Gastroesophageal reflux disease	Number	1990	122216.749456771	223221.762440142	60862.0734406305
DALYs (Disability-Adjusted Life Years)	Global	Both	70-74 years	Gastroesophageal reflux disease	Rate	1990	144.359889884278	263.664916542649	71.8890189689258
DALYs (Disability-Adjusted Life Years)	Global	Both	75-79 years	Gastroesophageal reflux disease	Number	1990	87610.0504870739	148503.840177414	43345.0792060577
DALYs (Disability-Adjusted Life Years)	Global	Both	75-79 years	Gastroesophageal reflux disease	Rate	1990	142.326892091086	241.251887409437	70.4162407913502
DALYs (Disability-Adjusted Life Years)	Global	Both	80-84 years	Gastroesophageal reflux disease	Number	1990	46592.4145852252	81908.2570341108	22533.1422872099
DALYs (Disability-Adjusted Life Years)	Global	Both	80-84 years	Gastroesophageal reflux disease	Rate	1990	131.706553841321	231.536707447927	63.6962592362759
DALYs (Disability-Adjusted Life Years)	Global	Both	85-89 years	Gastroesophageal reflux disease	Number	1990	17801.6431364294	33496.8831512255	8288.03978028591
DALYs (Disability-Adjusted Life Years)	Global	Both	85-89 years	Gastroesophageal reflux disease	Rate	1990	117.805292321809	221.671116607448	54.8474622038291
DALYs (Disability-Adjusted Life Years)	Global	Both	90-94 years	Gastroesophageal reflux disease	Number	1990	4670.41019038543	8964.74764305264	2268.20921312708
DALYs (Disability-Adjusted Life Years)	Global	Both	90-94 years	Gastroesophageal reflux disease	Rate	1990	108.989633116549	209.203157061056	52.9313871572159
DALYs (Disability-Adjusted Life Years)	China	Both	<5 years	Gastroesophageal reflux disease	Number	1990	0	0	0
DALYs (Disability-Adjusted Life Years)	China	Both	<5 years	Gastroesophageal reflux disease	Rate	1990	0	0	0
DALYs (Disability-Adjusted Life Years)	China	Both	5-9 years	Gastroesophageal reflux disease	Number	1990	178.92897112587	388.737881308598	63.4969858688494
DALYs (Disability-Adjusted Life Years)	China	Both	5-9 years	Gastroesophageal reflux disease	Rate	1990	0.171588519041371	0.372790146443638	0.0608920606890554
DALYs (Disability-Adjusted Life Years)	China	Both	10-14 years	Gastroesophageal reflux disease	Number	1990	3354.22008844637	6635.32467665218	1500.63592760008
DALYs (Disability-Adjusted Life Years)	China	Both	10-14 years	Gastroesophageal reflux disease	Rate	1990	3.27905055875799	6.48662416740662	1.46700602439255
DALYs (Disability-Adjusted Life Years)	China	Both	15-19 years	Gastroesophageal reflux disease	Number	1990	19596.6266010151	35210.5421713826	9388.18931101462
DALYs (Disability-Adjusted Life Years)	China	Both	15-19 years	Gastroesophageal reflux disease	Rate	1990	15.4711995097947	27.7981171898884	7.41181392204033
DALYs (Disability-Adjusted Life Years)	China	Both	20-24 years	Gastroesophageal reflux disease	Number	1990	42545.3188361742	79168.2887600253	19423.4320375318
DALYs (Disability-Adjusted Life Years)	China	Both	20-24 years	Gastroesophageal reflux disease	Rate	1990	32.2310807678024	59.9755643881441	14.7146201724388
DALYs (Disability-Adjusted Life Years)	China	Both	25-29 years	Gastroesophageal reflux disease	Number	1990	46655.0026977932	86386.3816142084	21708.7740216737
DALYs (Disability-Adjusted Life Years)	China	Both	25-29 years	Gastroesophageal reflux disease	Rate	1990	42.4563044461766	78.6120738556919	19.7551016123085
DALYs (Disability-Adjusted Life Years)	China	Both	30-34 years	Gastroesophageal reflux disease	Number	1990	43177.5324397643	82043.9082663034	20032.6232632217
DALYs (Disability-Adjusted Life Years)	China	Both	30-34 years	Gastroesophageal reflux disease	Rate	1990	48.929530638239	92.9736	22.7013170585775
DALYs (Disability-Adjusted Life Years)	China	Both	35-39 years	Gastroesophageal reflux disease	Number	1990	48696.2007050947	93906.5587523799	22563.6101419856
DALYs (Disability-Adjusted Life Years)	China	Both	35-39 years	Gastroesophageal reflux disease	Rate	1990	53.3136674173579	102.810957921593	24.7031347297468
DALYs (Disability-Adjusted Life Years)	China	Both	40-44 years	Gastroesophageal reflux disease	Number	1990	36994.3819747504	71984.0080553738	17280.9512961537
DALYs (Disability-Adjusted Life Years)	China	Both	40-44 years	Gastroesophageal reflux disease	Rate	1990	55.1378618086077	107.287757673472	25.7562000938125
DALYs (Disability-Adjusted Life Years)	China	Both	45-49 years	Gastroesophageal reflux disease	Number	1990	28664.9578420829	56629.275530693	14015.4553144321
DALYs (Disability-Adjusted Life Years)	China	Both	45-49 years	Gastroesophageal reflux disease	Rate	1990	55.5318435716992	109.706356020951	27.1517605710398
DALYs (Disability-Adjusted Life Years)	China	Both	50-54 years	Gastroesophageal reflux disease	Number	1990	27469.466108119	51903.4	12796.4114264795
DALYs (Disability-Adjusted Life Years)	China	Both	50-54 years	Gastroesophageal reflux disease	Rate	1990	57.574851173348	108.787395511605	26.8207427305886
DALYs (Disability-Adjusted Life Years)	China	Both	55-59 years	Gastroesophageal reflux disease	Number	1990	27224.5305006507	49966.3102854293	13047.9519503597
DALYs (Disability-Adjusted Life Years)	China	Both	55-59 years	Gastroesophageal reflux disease	Rate	1990	62.7740237159964	115.211770016875	30.0858244426837
DALYs (Disability-Adjusted Life Years)	China	Both	60-64 years	Gastroesophageal reflux disease	Number	1990	22815.3591588235	42459.2836471003	11133.1805748965
DALYs (Disability-Adjusted Life Years)	China	Both	60-64 years	Gastroesophageal reflux disease	Rate	1990	64.5642273073552	120.153744747809	31.5053204417106
DALYs (Disability-Adjusted Life Years)	China	Both	65-69 years	Gastroesophageal reflux disease	Number	1990	19136.2626579071	34767.4202310059	9121.99504829724
DALYs (Disability-Adjusted Life Years)	China	Both	65-69 years	Gastroesophageal reflux disease	Rate	1990	70.1429328025004	127.438093037047	33.4361780633833
DALYs (Disability-Adjusted Life Years)	China	Both	70-74 years	Gastroesophageal reflux disease	Number	1990	13853.2878563226	26154.6826118199	6747.53121585559
DALYs (Disability-Adjusted Life Years)	China	Both	70-74 years	Gastroesophageal reflux disease	Rate	1990	73.618582510761	138.990157417558	35.8574577176412
DALYs (Disability-Adjusted Life Years)	China	Both	75-79 years	Gastroesophageal reflux disease	Number	1990	8444.38620258272	15080.2220376049	3927.33330025469
DALYs (Disability-Adjusted Life Years)	China	Both	75-79 years	Gastroesophageal reflux disease	Rate	1990	74.1992000107406	132.507015232486	34.5087235547461
DALYs (Disability-Adjusted Life Years)	China	Both	80-84 years	Gastroesophageal reflux disease	Number	1990	3717.98841188431	6772.79854033654	1720.49061813752
DALYs (Disability-Adjusted Life Years)	China	Both	80-84 years	Gastroesophageal reflux disease	Rate	1990	70.1887920685497	127.857996262268	32.4797026979284
DALYs (Disability-Adjusted Life Years)	China	Both	85-89 years	Gastroesophageal reflux disease	Number	1990	1105.40291901507	2099.57963856682	497.262289193012
DALYs (Disability-Adjusted Life Years)	China	Both	85-89 years	Gastroesophageal reflux disease	Rate	1990	65.5303835066066	124.46706676018	29.4786524928175
DALYs (Disability-Adjusted Life Years)	China	Both	90-94 years	Gastroesophageal reflux disease	Number	1990	197.817006218263	374.736801104282	98.6157609962102
DALYs (Disability-Adjusted Life Years)	China	Both	90-94 years	Gastroesophageal reflux disease	Rate	1990	64.4728734985645	122.134890395599	32.1410257147362
DALYs (Disability-Adjusted Life Years)	China	Both	95+ years	Gastroesophageal reflux disease	Number	1990	29.8774763138971	54.5288644001616	14.4913521464554
DALYs (Disability-Adjusted Life Years)	China	Both	95+ years	Gastroesophageal reflux disease	Rate	1990	73.7859647837837	134.665486002196	35.7881096754619
DALYs (Disability-Adjusted Life Years)	China	Both	60-64 years	Gastroesophageal reflux disease	Number	2021	47390.3871461355	88052.6115755869	23154.8869067932
DALYs (Disability-Adjusted Life Years)	China	Both	60-64 years	Gastroesophageal reflux disease	Rate	2021	64.9137445224422	120.611480018635	31.7167785204765
DALYs (Disability-Adjusted Life Years)	China	Both	65-69 years	Gastroesophageal reflux disease	Number	2021	53701.8830266121	98018.840273719	25614.6716396303
DALYs (Disability-Adjusted Life Years)	China	Both	65-69 years	Gastroesophageal reflux disease	Rate	2021	70.0122870905225	127.789246833727	33.3943922166484
DALYs (Disability-Adjusted Life Years)	China	Both	70-74 years	Gastroesophageal reflux disease	Number	2021	39016.6113627162	73952.4178377042	18970.868610237
DALYs (Disability-Adjusted Life Years)	China	Both	70-74 years	Gastroesophageal reflux disease	Rate	2021	73.2067841009937	138.75676275579	35.5950000282458
DALYs (Disability-Adjusted Life Years)	China	Both	75-79 years	Gastroesophageal reflux disease	Number	2021	24484.5172064492	43716.4860695062	11523.0424602785
DALYs (Disability-Adjusted Life Years)	China	Both	75-79 years	Gastroesophageal reflux disease	Rate	2021	73.929055348968	131.998458088592	34.7929116449988
DALYs (Disability-Adjusted Life Years)	China	Both	80-84 years	Gastroesophageal reflux disease	Number	2021	13841.5636776456	25094.1234093923	6363.72595104339
DALYs (Disability-Adjusted Life Years)	China	Both	80-84 years	Gastroesophageal reflux disease	Rate	2021	69.935652857328	126.790147731107	32.153255178106
DALYs (Disability-Adjusted Life Years)	China	Both	85-89 years	Gastroesophageal reflux disease	Number	2021	6214.25426619779	11765.4835037822	2804.15664692859
DALYs (Disability-Adjusted Life Years)	China	Both	85-89 years	Gastroesophageal reflux disease	Rate	2021	65.2363707340517	123.512397600642	29.437643646229
DALYs (Disability-Adjusted Life Years)	China	Both	90-94 years	Gastroesophageal reflux disease	Number	2021	1877.50046326884	3533.39771845071	934.672977545693
DALYs (Disability-Adjusted Life Years)	China	Both	90-94 years	Gastroesophageal reflux disease	Rate	2021	64.0350774489713	120.51203234596	31.8784776235918
DALYs (Disability-Adjusted Life Years)	China	Both	95+ years	Gastroesophageal reflux disease	Number	2021	460.474577718992	842.61507193547	224.275123713337
DALYs (Disability-Adjusted Life Years)	China	Both	95+ years	Gastroesophageal reflux disease	Rate	2021	72.0506483460575	131.844330125342	35.0924217173601
DALYs (Disability-Adjusted Life Years)	Global	Both	<5 years	Gastroesophageal reflux disease	Number	2021	0	0	0
DALYs (Disability-Adjusted Life Years)	Global	Both	<5 years	Gastroesophageal reflux disease	Rate	2021	0	0	0
DALYs (Disability-Adjusted Life Years)	Global	Both	5-9 years	Gastroesophageal reflux disease	Number	2021	1393.06487478591	2891.48270998011	535.117435820339
DALYs (Disability-Adjusted Life Years)	Global	Both	5-9 years	Gastroesophageal reflux disease	Rate	2021	0.20275928053628	0.420852585238544	0.0778858388099299
DALYs (Disability-Adjusted Life Years)	Global	Both	10-14 years	Gastroesophageal reflux disease	Number	2021	31268.0547286693	60670.7371789912	14206.0250009854
DALYs (Disability-Adjusted Life Years)	Global	Both	10-14 years	Gastroesophageal reflux disease	Rate	2021	4.69042426611779	9.10102980108559	2.13100191130865
DALYs (Disability-Adjusted Life Years)	Global	Both	15-19 years	Gastroesophageal reflux disease	Number	2021	167634.956763219	294116.077749771	79396.6441404426
DALYs (Disability-Adjusted Life Years)	Global	Both	15-19 years	Gastroesophageal reflux disease	Rate	2021	26.8654430167464	47.1355072931252	12.7242316284235
DALYs (Disability-Adjusted Life Years)	Global	Both	20-24 years	Gastroesophageal reflux disease	Number	2021	399167.80576071	747251.585038656	185509.165227926
DALYs (Disability-Adjusted Life Years)	Global	Both	20-24 years	Gastroesophageal reflux disease	Rate	2021	66.8445727056514	125.134623044908	31.0653331849023
DALYs (Disability-Adjusted Life Years)	Global	Both	25-29 years	Gastroesophageal reflux disease	Number	2021	568086.524495024	1054453.46966293	268736.240497778
DALYs (Disability-Adjusted Life Years)	Global	Both	25-29 years	Gastroesophageal reflux disease	Rate	2021	96.5569936917063	179.224207278891	45.6767804896314
DALYs (Disability-Adjusted Life Years)	Global	Both	30-34 years	Gastroesophageal reflux disease	Number	2021	672626.592331524	1256059.48285463	319339.696997174
DALYs (Disability-Adjusted Life Years)	Global	Both	30-34 years	Gastroesophageal reflux disease	Rate	2021	111.273557082481	207.791675437547	52.8288123122601
DALYs (Disability-Adjusted Life Years)	Global	Both	35-39 years	Gastroesophageal reflux disease	Number	2021	688643.54255629	1299573.31353634	326946.693518252
DALYs (Disability-Adjusted Life Years)	Global	Both	35-39 years	Gastroesophageal reflux disease	Rate	2021	122.782164101962	231.708298974003	58.2931808626818
DALYs (Disability-Adjusted Life Years)	Global	Both	40-44 years	Gastroesophageal reflux disease	Number	2021	640274	1220892.7865421	302038.56167437
DALYs (Disability-Adjusted Life Years)	Global	Both	40-44 years	Gastroesophageal reflux disease	Rate	2021	127.990577407991	244.056140893062	60.3774275478497
DALYs (Disability-Adjusted Life Years)	Global	Both	45-49 years	Gastroesophageal reflux disease	Number	2021	591777.133010532	1144021.98984964	294186.876730079
DALYs (Disability-Adjusted Life Years)	Global	Both	45-49 years	Gastroesophageal reflux disease	Rate	2021	124.978110167711	241.607352339462	62.1296732146836
DALYs (Disability-Adjusted Life Years)	Global	Both	50-54 years	Gastroesophageal reflux disease	Number	2021	557570.753324931	1033264.07459746	269041.443569648
DALYs (Disability-Adjusted Life Years)	Global	Both	50-54 years	Gastroesophageal reflux disease	Rate	2021	125.318487654758	232.234367395319	60.4692169084285
DALYs (Disability-Adjusted Life Years)	Global	Both	55-59 years	Gastroesophageal reflux disease	Number	2021	528661.764360525	988775.081590663	257994.065333323
DALYs (Disability-Adjusted Life Years)	Global	Both	55-59 years	Gastroesophageal reflux disease	Rate	2021	133.592204502842	249.862297242084	65.1947961060115
DALYs (Disability-Adjusted Life Years)	Global	Both	60-64 years	Gastroesophageal reflux disease	Number	2021	444747.654937035	784722.054804459	219066.70336357
DALYs (Disability-Adjusted Life Years)	Global	Both	60-64 years	Gastroesophageal reflux disease	Rate	2021	138.962861438822	245.188976173957	68.4481089612065
DALYs (Disability-Adjusted Life Years)	Global	Both	65-69 years	Gastroesophageal reflux disease	Number	2021	383356.650711164	676534.852300155	188618.690743702
DALYs (Disability-Adjusted Life Years)	Global	Both	65-69 years	Gastroesophageal reflux disease	Rate	2021	138.976816584073	245.261585801187	68.3792106884977
DALYs (Disability-Adjusted Life Years)	Global	Both	70-74 years	Gastroesophageal reflux disease	Number	2021	290308.420185932	529597.649627612	144384.254869225
DALYs (Disability-Adjusted Life Years)	Global	Both	70-74 years	Gastroesophageal reflux disease	Rate	2021	141.036494231533	257.287045993707	70.1441904990068
DALYs (Disability-Adjusted Life Years)	Global	Both	75-79 years	Gastroesophageal reflux disease	Number	2021	182415.890747773	312483.530935984	90077.788489015
DALYs (Disability-Adjusted Life Years)	Global	Both	75-79 years	Gastroesophageal reflux disease	Rate	2021	138.314982221284	236.937439214748	68.3005612192958
DALYs (Disability-Adjusted Life Years)	Global	Both	80-84 years	Gastroesophageal reflux disease	Number	2021	112106.477982026	196992.429191129	54488.5566899736
DALYs (Disability-Adjusted Life Years)	Global	Both	80-84 years	Gastroesophageal reflux disease	Rate	2021	128.000188536873	224.920705125033	62.213581721272
DALYs (Disability-Adjusted Life Years)	Global	Both	85-89 years	Gastroesophageal reflux disease	Number	2021	51464.0124407409	96007.7310820523	24062.9937804514
DALYs (Disability-Adjusted Life Years)	Global	Both	85-89 years	Gastroesophageal reflux disease	Rate	2021	112.559	209.982436981397	52.6291582786081
DALYs (Disability-Adjusted Life Years)	Global	Both	90-94 years	Gastroesophageal reflux disease	Number	2021	18685.094793423	36088.0117100909	9113.1644288955
DALYs (Disability-Adjusted Life Years)	Global	Both	90-94 years	Gastroesophageal reflux disease	Rate	2021	104.448010423293	201.728761075286	50.9417749164166
DALYs (Disability-Adjusted Life Years)	Global	Both	95+ years	Gastroesophageal reflux disease	Number	2021	5973.42390577639	11039.8454022944	2916.89077170411
DALYs (Disability-Adjusted Life Years)	Global	Both	95+ years	Gastroesophageal reflux disease	Rate	2021	109.597901000522	202.554498483138	53.5179004653298
DALYs (Disability-Adjusted Life Years)	China	Both	<5 years	Gastroesophageal reflux disease	Number	2021	0	0	0
DALYs (Disability-Adjusted Life Years)	China	Both	<5 years	Gastroesophageal reflux disease	Rate	2021	0	0	0
DALYs (Disability-Adjusted Life Years)	China	Both	5-9 years	Gastroesophageal reflux disease	Number	2021	164.555451164039	342.862610368179	61.2591370494415
DALYs (Disability-Adjusted Life Years)	China	Both	5-9 years	Gastroesophageal reflux disease	Rate	2021	0.171822887152858	0.358004813535463	0.0639645889447622
DALYs (Disability-Adjusted Life Years)	China	Both	10-14 years	Gastroesophageal reflux disease	Number	2021	2806.72281475529	5398.03633538467	1254.06231030757
DALYs (Disability-Adjusted Life Years)	China	Both	10-14 years	Gastroesophageal reflux disease	Rate	2021	3.25632510303885	6.26273500668481	1.45494758526251
DALYs (Disability-Adjusted Life Years)	China	Both	15-19 years	Gastroesophageal reflux disease	Number	2021	11420.7643806752	20518.6139402368	5350.85213117172
DALYs (Disability-Adjusted Life Years)	China	Both	15-19 years	Gastroesophageal reflux disease	Rate	2021	15.2945423700074	27.4782667624059	7.16579310350959
DALYs (Disability-Adjusted Life Years)	China	Both	20-24 years	Gastroesophageal reflux disease	Number	2021	23228.2485082942	43156.3448773216	10610.3751995403
DALYs (Disability-Adjusted Life Years)	China	Both	20-24 years	Gastroesophageal reflux disease	Rate	2021	31.7437866833261	58.9775766058548	14.5001671927177
DALYs (Disability-Adjusted Life Years)	China	Both	25-29 years	Gastroesophageal reflux disease	Number	2021	36345.1543494125	67823.9579287906	16768.0941498495
DALYs (Disability-Adjusted Life Years)	China	Both	25-29 years	Gastroesophageal reflux disease	Rate	2021	42.0262303727748	78.4254553799911	19.3890987744654
DALYs (Disability-Adjusted Life Years)	China	Both	30-34 years	Gastroesophageal reflux disease	Number	2021	59044.4275692435	112725.577630076	27297.2
DALYs (Disability-Adjusted Life Years)	China	Both	30-34 years	Gastroesophageal reflux disease	Rate	2021	48.735311014188	93.0437690942652	22.5311175781782
DALYs (Disability-Adjusted Life Years)	China	Both	35-39 years	Gastroesophageal reflux disease	Number	2021	56228.3099108905	108322.885212845	26172.1129511262
DALYs (Disability-Adjusted Life Years)	China	Both	35-39 years	Gastroesophageal reflux disease	Rate	2021	53.0639697442588	102.226837560201	24.699234460058
DALYs (Disability-Adjusted Life Years)	China	Both	40-44 years	Gastroesophageal reflux disease	Number	2021	50235.6921166014	96828.511365406	23435.3972062664
DALYs (Disability-Adjusted Life Years)	China	Both	40-44 years	Gastroesophageal reflux disease	Rate	2021	54.8821915268873	105.78456635344	25.6030305106107
DALYs (Disability-Adjusted Life Years)	China	Both	45-49 years	Gastroesophageal reflux disease	Number	2021	61057.8255567711	120175.611014106	29828.8606428132
DALYs (Disability-Adjusted Life Years)	China	Both	45-49 years	Gastroesophageal reflux disease	Rate	2021	55.345324196673	108.932116259606	27.0381060517607
DALYs (Disability-Adjusted Life Years)	China	Both	50-54 years	Gastroesophageal reflux disease	Number	2021	69546.8753582144	131684.277109234	32492.2010479648
DALYs (Disability-Adjusted Life Years)	China	Both	50-54 years	Gastroesophageal reflux disease	Rate	2021	57.5437957162407	108.956917215686	26.8843793462286
DALYs (Disability-Adjusted Life Years)	China	Both	55-59 years	Gastroesophageal reflux disease	Number	2021	69181.7518749385	125579.41744778	32990.8684360584
DALYs (Disability-Adjusted Life Years)	China	Both	55-59 years	Gastroesophageal reflux disease	Rate	2021	62.9254662768145	114.222944396627	30.0074184731371
Prevalence	Global	Both	95+ years	Gastroesophageal reflux disease	Number	1990	174584.891902382	229031.137834678	126872.796533995
Prevalence	Global	Both	95+ years	Gastroesophageal reflux disease	Rate	1990	17148.3357043234	22496.2354733895	12461.8876410439
Prevalence	Global	Both	95+ years	Gastroesophageal reflux disease	Number	2021	888548.674415683	1174572.10793841	646945.235665545
Prevalence	Global	Both	95+ years	Gastroesophageal reflux disease	Rate	2021	16302.7220550318	21550.5612249155	11869.8825011676
Prevalence	Global	Both	5-9 years	Gastroesophageal reflux disease	Number	1990	146787.819591539	246667.186951677	78522.292356784
Prevalence	Global	Both	5-9 years	Gastroesophageal reflux disease	Rate	1990	25.1551	42.2715	13.4564
Prevalence	Global	Both	5-9 years	Gastroesophageal reflux disease	Number	2021	174514.885394126	292725.393977121	93061.059458352
Prevalence	Global	Both	5-9 years	Gastroesophageal reflux disease	Rate	2021	25.4005	42.6059	13.5449
Prevalence	Global	Both	10-14 years	Gastroesophageal reflux disease	Number	1990	3088258.37397977	4450887.40148355	2016978.38708168
Prevalence	Global	Both	10-14 years	Gastroesophageal reflux disease	Rate	1990	576.50896114468	830.88140993026	376.52488029661
Prevalence	Global	Both	10-14 years	Gastroesophageal reflux disease	Number	2021	3955761.32249689	5725001.06429078	2592057.80234167
Prevalence	Global	Both	10-14 years	Gastroesophageal reflux disease	Rate	2021	593.39153199695	858.78971840479	388.82658101963
Prevalence	Global	Both	15-19 years	Gastroesophageal reflux disease	Number	1990	16303936.563501	21944532.7907486	11662573.7047151
Prevalence	Global	Both	15-19 years	Gastroesophageal reflux disease	Rate	1990	3138.85261567095	4224.78668765914	2245.29210083233
Prevalence	Global	Both	15-19 years	Gastroesophageal reflux disease	Number	2021	21221695.3574974	28542138.4848727	15147611.6409896
Prevalence	Global	Both	15-19 years	Gastroesophageal reflux disease	Rate	2021	3401.02242607366	4574.20820720894	2427.58017324283
Prevalence	Global	Both	20-24 years	Gastroesophageal reflux disease	Number	1990	37006130.1967186	48351668.1274646	26820251.1036151
Prevalence	Global	Both	20-24 years	Gastroesophageal reflux disease	Rate	1990	7520.22755190189	9825.81926020511	5450.29675424473
Prevalence	Global	Both	20-24 years	Gastroesophageal reflux disease	Number	2021	50496905.4360634	65992864.2172478	36831925.5062137
Prevalence	Global	Both	20-24 years	Gastroesophageal reflux disease	Rate	2021	8456.20317600169	11051.1537918677	6167.86796644903
Prevalence	Global	Both	25-29 years	Gastroesophageal reflux disease	Number	1990	49323636.0783893	64569658.6815531	37122334.2068613
Prevalence	Global	Both	25-29 years	Gastroesophageal reflux disease	Rate	1990	11143.5711811382	14588.0686191938	8386.96021896505
Prevalence	Global	Both	25-29 years	Gastroesophageal reflux disease	Number	2021	72265498.3244701	94258971.2289882	54155936.8152557
Prevalence	Global	Both	25-29 years	Gastroesophageal reflux disease	Rate	2021	12282.8811544974	16021.0856936527	9204.82043485769
Prevalence	Global	Both	30-34 years	Gastroesophageal reflux disease	Number	1990	52124202.5385597	69343391.5023995	37945728.0230976
Prevalence	Global	Both	30-34 years	Gastroesophageal reflux disease	Rate	1990	13523.9131844554	17991.5271778098	9845.22940424272
Prevalence	Global	Both	30-34 years	Gastroesophageal reflux disease	Number	2021	85869572.2760022	113769652.993451	62634317.9632111
Prevalence	Global	Both	30-34 years	Gastroesophageal reflux disease	Rate	2021	14205.5233338031	18821.0726738278	10361.682744423
Prevalence	Global	Both	35-39 years	Gastroesophageal reflux disease	Number	1990	51151663.6381463	69281786.7727101	36876998.7533564
Prevalence	Global	Both	35-39 years	Gastroesophageal reflux disease	Rate	1990	14521.637039328	19668.6654820573	10469.1490541597
Prevalence	Global	Both	35-39 years	Gastroesophageal reflux disease	Number	2021	88273155.5188383	119097141.805398	63651066.6849198
Prevalence	Global	Both	35-39 years	Gastroesophageal reflux disease	Rate	2021	15738.7216998786	21234.505089445	11348.7097925323
Prevalence	Global	Both	40-44 years	Gastroesophageal reflux disease	Number	1990	44219943.5259398	59908472.1345257	31565524.6665076
Prevalence	Global	Both	40-44 years	Gastroesophageal reflux disease	Rate	1990	15435.5247046413	20911.801958936	11018.3414304686
Prevalence	Global	Both	40-44 years	Gastroesophageal reflux disease	Number	2021	82435565.8849092	110906957.796327	59022860.3043219
Prevalence	Global	Both	40-44 years	Gastroesophageal reflux disease	Rate	2021	16478.847531886	22170.2711461044	11798.653959732
Prevalence	Global	Both	45-49 years	Gastroesophageal reflux disease	Number	1990	37114493.5903959	48600857.5601953	26840416.8730815
Prevalence	Global	Both	45-49 years	Gastroesophageal reflux disease	Rate	1990	15984.1576586581	20931.0081975407	11559.4047882808
Prevalence	Global	Both	45-49 years	Gastroesophageal reflux disease	Number	2021	76622174.7373752	100108265.860024	55768216.7838374
Prevalence	Global	Both	45-49 years	Gastroesophageal reflux disease	Rate	2021	16181.927386922	21141.9826509754	11777.7554289905
Prevalence	Global	Both	50-54 years	Gastroesophageal reflux disease	Number	1990	35328091.4499552	47166130.4899657	24700940.8587395
Prevalence	Global	Both	50-54 years	Gastroesophageal reflux disease	Rate	1990	16619.3948473299	22188.3638164784	11620.0641581066
Prevalence	Global	Both	50-54 years	Gastroesophageal reflux disease	Number	2021	72584271.7900429	96316588.5189702	50991909.0053552
Prevalence	Global	Both	50-54 years	Gastroesophageal reflux disease	Rate	2021	16313.8957953004	21647.923850534	11460.8395097369
Prevalence	Global	Both	55-59 years	Gastroesophageal reflux disease	Number	1990	33085696.9318813	42536278.9093496	24299065.7091856
Prevalence	Global	Both	55-59 years	Gastroesophageal reflux disease	Rate	1990	17864.8511244636	22967.7582935226	13120.4487622524
Prevalence	Global	Both	55-59 years	Gastroesophageal reflux disease	Number	2021	69426526.4874102	8.84418e+07	51145590.3702211
Prevalence	Global	Both	55-59 years	Gastroesophageal reflux disease	Rate	2021	17544.0013817663	22349.1322489549	12924.430380211
Prevalence	Global	Both	60-64 years	Gastroesophageal reflux disease	Number	1990	29542987.6017873	38453450.9948009	22374268.4209628
Prevalence	Global	Both	60-64 years	Gastroesophageal reflux disease	Rate	1990	18394.3266219599	23942.2412815522	13930.8727610776
Prevalence	Global	Both	60-64 years	Gastroesophageal reflux disease	Number	2021	59215462.4679788	76741150.9346229	45097298.9147835
Prevalence	Global	Both	60-64 years	Gastroesophageal reflux disease	Rate	2021	18502.065192763	23978.0239549403	14090.7987502428
Prevalence	Global	Both	65-69 years	Gastroesophageal reflux disease	Number	1990	23697598.0507013	30757683.8339221	17762071.8200566
Prevalence	Global	Both	65-69 years	Gastroesophageal reflux disease	Rate	1990	19171.347049957	24882.9535369524	14369.5087772193
Prevalence	Global	Both	65-69 years	Gastroesophageal reflux disease	Number	2021	51587747.4728093	66677197.1676781	38735879.5704663
Prevalence	Global	Both	65-69 years	Gastroesophageal reflux disease	Rate	2021	18701.9082757896	24172.2286124998	14042.7698862162
Prevalence	Global	Both	70-74 years	Gastroesophageal reflux disease	Number	1990	16608089.0537914	20933275.4595201	12487943.318864
Prevalence	Global	Both	70-74 years	Gastroesophageal reflux disease	Rate	1990	19617.1303659294	24725.9508511348	14750.4996688687
Prevalence	Global	Both	70-74 years	Gastroesophageal reflux disease	Number	2021	39498097.1607402	49687136.4567065	29871538.6453044
Prevalence	Global	Both	70-74 years	Gastroesophageal reflux disease	Rate	2021	19188.8101240724	24138.8090974747	14512.0733499126
Prevalence	Global	Both	75-79 years	Gastroesophageal reflux disease	Number	1990	12080918.0575084	15715628.0048217	9063636.08277979
Prevalence	Global	Both	75-79 years	Gastroesophageal reflux disease	Rate	1990	19626.0533029363	25530.8207077899	14724.3284022191
Prevalence	Global	Both	75-79 years	Gastroesophageal reflux disease	Number	2021	25213585.4949422	32808552.4701075	18894246.4591538
Prevalence	Global	Both	75-79 years	Gastroesophageal reflux disease	Rate	2021	19117.9431527147	24876.7491308285	14326.3690041999
Prevalence	Global	Both	80-84 years	Gastroesophageal reflux disease	Number	1990	6539387.16227696	8643220.27045821	4773818.79038029
Prevalence	Global	Both	80-84 years	Gastroesophageal reflux disease	Rate	1990	18485.4155991904	24432.4911264522	13494.5404126642
Prevalence	Global	Both	80-84 years	Gastroesophageal reflux disease	Number	2021	15761668.4690682	20743197.862736	11426423.3776837
Prevalence	Global	Both	80-84 years	Gastroesophageal reflux disease	Rate	2021	17996.2529553367	23684.0304421443	13046.385659178
Prevalence	Global	Both	85-89 years	Gastroesophageal reflux disease	Number	1990	2548750.50381182	3449525.72333449	1855982.21654073
Prevalence	Global	Both	85-89 years	Gastroesophageal reflux disease	Rate	1990	16866.7743677247	22827.8020795404	12282.266636175
Prevalence	Global	Both	85-89 years	Gastroesophageal reflux disease	Number	2021	7385929.27135717	9957440.0787592	5385196.02337103
Prevalence	Global	Both	85-89 years	Gastroesophageal reflux disease	Rate	2021	16154.0681181845	21778.3246231194	11778.1825678554
Prevalence	Global	Both	90-94 years	Gastroesophageal reflux disease	Number	1990	680298.657509998	892262.498609957	491673.228272253
Prevalence	Global	Both	90-94 years	Gastroesophageal reflux disease	Rate	1990	15875.5865264967	20822.0174252252	11473.7855088056
Prevalence	Global	Both	90-94 years	Gastroesophageal reflux disease	Number	2021	2726973.07638245	3571010.99613658	1965827.35767651
Prevalence	Global	Both	90-94 years	Gastroesophageal reflux disease	Rate	2021	15243.5358479579	19961.6	10988.7992870801
Prevalence	Global	Both	<5 years	Gastroesophageal reflux disease	Number	1990	0	0	0
Prevalence	Global	Both	<5 years	Gastroesophageal reflux disease	Rate	1990	0	0	0
Prevalence	Global	Both	<5 years	Gastroesophageal reflux disease	Number	2021	0	0	0
Prevalence	Global	Both	<5 years	Gastroesophageal reflux disease	Rate	2021	0	0	0
Prevalence	China	Both	95+ years	Gastroesophageal reflux disease	Number	1990	4395.76845721637	6264.08	3000.67602575034
Prevalence	China	Both	95+ years	Gastroesophageal reflux disease	Rate	1990	10855.8705954348	15469.8788631821	7410.52467877193
Prevalence	China	Both	95+ years	Gastroesophageal reflux disease	Number	2021	69103.4580658945	98972.9978646651	47023.3772338151
Prevalence	China	Both	95+ years	Gastroesophageal reflux disease	Rate	2021	10812.6467725233	15486.3460654583	7357.7673579739
Prevalence	China	Both	<5 years	Gastroesophageal reflux disease	Number	1990	0	0	0
Prevalence	China	Both	<5 years	Gastroesophageal reflux disease	Rate	1990	0	0	0
Prevalence	China	Both	<5 years	Gastroesophageal reflux disease	Number	2021	0	0	0
Prevalence	China	Both	<5 years	Gastroesophageal reflux disease	Rate	2021	0	0	0
Prevalence	China	Both	5-9 years	Gastroesophageal reflux disease	Number	1990	22382.0888433929	38418.0239177187	11667.5826032907
Prevalence	China	Both	5-9 years	Gastroesophageal reflux disease	Rate	1990	21.4639	36.8419	11.1889
Prevalence	China	Both	5-9 years	Gastroesophageal reflux disease	Number	2021	20474.4803005402	35139.4776378259	10669.9194227708
Prevalence	China	Both	5-9 years	Gastroesophageal reflux disease	Rate	2021	21.3787	36.6914	11.1411
Prevalence	China	Both	10-14 years	Gastroesophageal reflux disease	Number	1990	424374.326541004	611247.624731724	274174.996277404
Prevalence	China	Both	10-14 years	Gastroesophageal reflux disease	Rate	1990	414.86391348021	597.54929985659	268.031
Prevalence	China	Both	10-14 years	Gastroesophageal reflux disease	Number	2021	353855.417171228	510461.109260522	228352.367938314
Prevalence	China	Both	10-14 years	Gastroesophageal reflux disease	Rate	2021	410.53867938912	592.23066683733	264.93159358193
Prevalence	China	Both	15-19 years	Gastroesophageal reflux disease	Number	1990	2473466.02871131	3395762.54453811	1766079.53649761
Prevalence	China	Both	15-19 years	Gastroesophageal reflux disease	Rate	1990	1952.7588696776	2680.89609931721	1394.28940580543
Prevalence	China	Both	15-19 years	Gastroesophageal reflux disease	Number	2021	1438720.59627583	1977475.32684215	1027857.28754967
Prevalence	China	Both	15-19 years	Gastroesophageal reflux disease	Rate	2021	1926.71631993182	2648.20980136912	1376.49340365954
Prevalence	China	Both	20-24 years	Gastroesophageal reflux disease	Number	1990	5359309.41608003	7188735.0711672	3817578.86586388
Prevalence	China	Both	20-24 years	Gastroesophageal reflux disease	Rate	1990	4060.05500427582	5445.97401160196	2892.08533697708
Prevalence	China	Both	20-24 years	Gastroesophageal reflux disease	Number	2021	2920358.21534988	3915334.16457132	2078288.82493562
Prevalence	China	Both	20-24 years	Gastroesophageal reflux disease	Rate	2021	3990.96936619493	5350.70616580115	2840.19507977709
Prevalence	China	Both	25-29 years	Gastroesophageal reflux disease	Number	1990	5906885.61924332	7851898.18104653	4378326.74848669
Prevalence	China	Both	25-29 years	Gastroesophageal reflux disease	Rate	1990	5375.29781755213	7145.2697541192	3984.30098917091
Prevalence	China	Both	25-29 years	Gastroesophageal reflux disease	Number	2021	4590157.97863993	6133547.28542565	3386667.16045586
Prevalence	China	Both	25-29 years	Gastroesophageal reflux disease	Rate	2021	5307.6411453146	7092.28	3916.03383804393
Prevalence	China	Both	30-34 years	Gastroesophageal reflux disease	Number	1990	5483418.32427283	7636998.33351752	3888442.35195604
Prevalence	China	Both	30-34 years	Gastroesophageal reflux disease	Rate	1990	6213.90500427709	8654.37932251753	4406.45049506905
Prevalence	China	Both	30-34 years	Gastroesophageal reflux disease	Number	2021	7480239.93975823	10395659.4248134	5.29786e+06
Prevalence	China	Both	30-34 years	Gastroesophageal reflux disease	Rate	2021	6174.19517696815	8580.58441961698	4372.85632760571
Prevalence	China	Both	35-39 years	Gastroesophageal reflux disease	Number	1990	6197247.96062548	8889908.83299028	4315247.72649119
Prevalence	China	Both	35-39 years	Gastroesophageal reflux disease	Rate	1990	6784.88284284402	9732.86695943592	4724.42775375681
Prevalence	China	Both	35-39 years	Gastroesophageal reflux disease	Number	2021	7139840.07732602	10264375.2635942	4993838.25531552
Prevalence	China	Both	35-39 years	Gastroesophageal reflux disease	Rate	2021	6738.03389151295	9686.73074638487	4712.80183430269
Prevalence	China	Both	40-44 years	Gastroesophageal reflux disease	Number	1990	4722027.72236348	6615017.25754066	3276568.37354686
Prevalence	China	Both	40-44 years	Gastroesophageal reflux disease	Rate	1990	7037.89327227566	9859.27829952055	4883.52459328522
Prevalence	China	Both	40-44 years	Gastroesophageal reflux disease	Number	2021	6402994.66900383	9003792.60215587	4435581.80772994
Prevalence	China	Both	40-44 years	Gastroesophageal reflux disease	Rate	2021	6995.23316916293	9836.58927029272	4845.84644996986
Prevalence	China	Both	45-49 years	Gastroesophageal reflux disease	Number	1990	3678079.42188247	5064304.89510432	2548618.09595018
Prevalence	China	Both	45-49 years	Gastroesophageal reflux disease	Rate	1990	7125.44327556638	9810.94020035329	4937.3685532001
Prevalence	China	Both	45-49 years	Gastroesophageal reflux disease	Number	2021	7829118.53822978	10829694.778373	5438203.54333494
Prevalence	China	Both	45-49 years	Gastroesophageal reflux disease	Rate	2021	7096.63502952011	9816.48073763749	4929.41134750238
Prevalence	China	Both	50-54 years	Gastroesophageal reflux disease	Number	1990	3541723.17123661	4879552.59508912	2410176.77639224
Prevalence	China	Both	50-54 years	Gastroesophageal reflux disease	Rate	1990	7423.30352102751	10227.3379959046	5051.62964056402
Prevalence	China	Both	50-54 years	Gastroesophageal reflux disease	Number	2021	8967686.93873568	12351692.1311406	6088068.67066121
Prevalence	China	Both	50-54 years	Gastroesophageal reflux disease	Rate	2021	7419.95585843175	10219.9163525799	5037.33026230911
Prevalence	China	Both	55-59 years	Gastroesophageal reflux disease	Number	1990	3542520.03904279	4959328.11438544	2491270.63681244
Prevalence	China	Both	55-59 years	Gastroesophageal reflux disease	Rate	1990	8168.3038368632	11435.1643515174	5744.34449969639
Prevalence	China	Both	55-59 years	Gastroesophageal reflux disease	Number	2021	9008627.02988388	12599018.3118107	6321209.02605274
Prevalence	China	Both	55-59 years	Gastroesophageal reflux disease	Rate	2021	8193.95347770473	11459.6563459967	5749.56566749894
Prevalence	China	Both	60-64 years	Gastroesophageal reflux disease	Number	1990	3009610.50868159	4186313.14717507	2188333.45539866
Prevalence	China	Both	60-64 years	Gastroesophageal reflux disease	Rate	1990	8516.77046311041	11846.7	6192.67299958364
Prevalence	China	Both	60-64 years	Gastroesophageal reflux disease	Number	2021	6255685.23244689	8714136.22141573	4551201.63271719
Prevalence	China	Both	60-64 years	Gastroesophageal reflux disease	Rate	2021	8568.82539785257	11936.3281558857	6234.08159011879
Prevalence	China	Both	65-69 years	Gastroesophageal reflux disease	Number	1990	2548729.61197425	3553462.33501686	1800886.90847313
Prevalence	China	Both	65-69 years	Gastroesophageal reflux disease	Rate	1990	9342.23014704402	13025.0234456472	6601.05328109813
Prevalence	China	Both	65-69 years	Gastroesophageal reflux disease	Number	2021	7159417.32680889	9991228.85065966	5058234.18934843
Prevalence	China	Both	65-69 years	Gastroesophageal reflux disease	Rate	2021	9333.88464305823	13025.7775566799	6594.5274965547
Prevalence	China	Both	70-74 years	Gastroesophageal reflux disease	Number	1990	1863411.72294988	2518241.43217338	1330613.07548932
Prevalence	China	Both	70-74 years	Gastroesophageal reflux disease	Rate	1990	9902.46727710172	13382.3368560021	7071.09023531191
Prevalence	China	Both	70-74 years	Gastroesophageal reflux disease	Number	2021	5250093.11001765	7101465.16704057	3748750.6642857
Prevalence	China	Both	70-74 years	Gastroesophageal reflux disease	Rate	2021	9850.73842631166	13324.4638405747	7033.77281992934
Prevalence	China	Both	75-79 years	Gastroesophageal reflux disease	Number	1990	1152293.6255356	1624894.45675874	838293.753451822
Prevalence	China	Both	75-79 years	Gastroesophageal reflux disease	Rate	1990	10124.9828159289	14277.6355676995	7365.93
Prevalence	China	Both	75-79 years	Gastroesophageal reflux disease	Number	2021	3345196.34691803	4707208.7862321	2442708.63618454
Prevalence	China	Both	75-79 years	Gastroesophageal reflux disease	Rate	2021	10100.5547219582	14213.0431228122	7375.56474743647
Prevalence	China	Both	80-84 years	Gastroesophageal reflux disease	Number	1990	516892.137502986	723635.457407096	357401.117206412
Prevalence	China	Both	80-84 years	Gastroesophageal reflux disease	Rate	1990	9757.97413598668	13660.9082726095	6747.0766236075
Prevalence	China	Both	80-84 years	Gastroesophageal reflux disease	Number	2021	1932177.79867389	2703931.60373144	1337769.86749283
Prevalence	China	Both	80-84 years	Gastroesophageal reflux disease	Rate	2021	9762.48919079341	13661.8395430224	6759.19363121309
Prevalence	China	Both	85-89 years	Gastroesophageal reflux disease	Number	1990	156907.343933102	226454.652213184	112158.348680998
Prevalence	China	Both	85-89 years	Gastroesophageal reflux disease	Rate	1990	9301.76521706746	13424.6616786642	6648.95982822471
Prevalence	China	Both	85-89 years	Gastroesophageal reflux disease	Number	2021	889242.218669698	1282535.66455072	636262.394212772
Prevalence	China	Both	85-89 years	Gastroesophageal reflux disease	Rate	2021	9335.14023799371	13463.8797365249	6679.39348069132
Prevalence	China	Both	90-94 years	Gastroesophageal reflux disease	Number	1990	28506.2820524619	39053.5393480362	19778.0541145282
Prevalence	China	Both	90-94 years	Gastroesophageal reflux disease	Rate	1990	9290.8185793436	12728.3995961348	6446.09887365696
Prevalence	China	Both	90-94 years	Gastroesophageal reflux disease	Number	2021	274270.899672479	376344.695891119	190679.550964513
Prevalence	China	Both	90-94 years	Gastroesophageal reflux disease	Rate	2021	9354.43620181486	12835.8219986477	6503.42306317676
Incidence	Global	Both	80-84 years	Gastroesophageal reflux disease	Number	1990	2285799.46918149	3069921.89302225	1572170.46584383
Incidence	Global	Both	80-84 years	Gastroesophageal reflux disease	Rate	1990	6461.45458522084	8677.99698065442	4444.18165383204
Incidence	Global	Both	80-84 years	Gastroesophageal reflux disease	Number	2021	5530547.40636531	7403567.43606461	3814861.73360727
Incidence	Global	Both	80-84 years	Gastroesophageal reflux disease	Rate	2021	6314.6316204883	8453.19596797668	4355.70744825401
Incidence	Global	Both	85-89 years	Gastroesophageal reflux disease	Number	1990	903622.49236986	1194178.79519413	650236.535514831
Incidence	Global	Both	85-89 years	Gastroesophageal reflux disease	Rate	1990	5979.87000673831	7902.67398206972	4303.04689053606
Incidence	Global	Both	85-89 years	Gastroesophageal reflux disease	Number	2021	2629733.98038557	3478313.7077983	1888908.64294128
Incidence	Global	Both	85-89 years	Gastroesophageal reflux disease	Rate	2021	5751.59878887482	7607.56223189011	4131.30938112732
Incidence	Global	Both	90-94 years	Gastroesophageal reflux disease	Number	1990	257891.711583529	340317.805499188	180520.216163389
Incidence	Global	Both	90-94 years	Gastroesophageal reflux disease	Rate	1990	6018.21293708855	7941.72487049252	4212.65613248934
Incidence	Global	Both	90-94 years	Gastroesophageal reflux disease	Number	2021	1036614.51155945	1369750.16172991	734100.804663618
Incidence	Global	Both	90-94 years	Gastroesophageal reflux disease	Rate	2021	5794.58250040074	7656.78101991922	4103.55790778448
Incidence	Global	Both	<5 years	Gastroesophageal reflux disease	Number	1990	0	0	0
Incidence	Global	Both	<5 years	Gastroesophageal reflux disease	Rate	1990	0	0	0
Incidence	Global	Both	<5 years	Gastroesophageal reflux disease	Number	2021	0	0	0
Incidence	Global	Both	<5 years	Gastroesophageal reflux disease	Rate	2021	0	0	0
Incidence	Global	Both	5-9 years	Gastroesophageal reflux disease	Number	1990	130307.280648838	215622.292737529	69769.7471264232
Incidence	Global	Both	5-9 years	Gastroesophageal reflux disease	Rate	1990	22.3308	36.9513	11.9565
Incidence	Global	Both	5-9 years	Gastroesophageal reflux disease	Number	2021	154900.663698302	256955.584769077	82984.0342882251
Incidence	Global	Both	5-9 years	Gastroesophageal reflux disease	Rate	2021	22.5456	37.3996	12.0782
Incidence	Global	Both	10-14 years	Gastroesophageal reflux disease	Number	1990	2495361.66521877	3660469.58148496	1529735.83835883
Incidence	Global	Both	10-14 years	Gastroesophageal reflux disease	Rate	1990	465.82836896566	683.32803158698	285.56756339708
Incidence	Global	Both	10-14 years	Gastroesophageal reflux disease	Number	2021	3198893.93464174	4700537.64892106	1956156.79322485
Incidence	Global	Both	10-14 years	Gastroesophageal reflux disease	Rate	2021	479.85619399672	705.11312723539	293.43703568678
Incidence	Global	Both	15-19 years	Gastroesophageal reflux disease	Number	1990	10035922.5162008	14451091.4770199	6787570.20843996
Incidence	Global	Both	15-19 years	Gastroesophageal reflux disease	Rate	1990	1932.12734347658	2782.14074897037	1306.75082179276
Incidence	Global	Both	95+ years	Gastroesophageal reflux disease	Number	1990	65846.2529976209	95168.8798308604	42151.2090278395
Incidence	Global	Both	95+ years	Gastroesophageal reflux disease	Rate	1990	6467.64813937265	9347.81860080154	4140.23845291644
Incidence	Global	Both	95+ years	Gastroesophageal reflux disease	Number	2021	335961.332418093	489012.996648831	214456.824542812
Incidence	Global	Both	95+ years	Gastroesophageal reflux disease	Rate	2021	6164.07899910726	8972.20737052664	3934.76475064839
Incidence	Global	Both	15-19 years	Gastroesophageal reflux disease	Number	2021	13156096.3556735	18931071.3371669	8866542.4283311
Incidence	Global	Both	15-19 years	Gastroesophageal reflux disease	Rate	2021	2108.41678723014	3033.92340162674	1420.96609778323
Incidence	Global	Both	20-24 years	Gastroesophageal reflux disease	Number	1990	17534901.9611591	23678134.9979174	12836358.5744608
Incidence	Global	Both	20-24 years	Gastroesophageal reflux disease	Rate	1990	3563.36780277286	4811.7693539537	2608.54990523468
Incidence	Global	Both	20-24 years	Gastroesophageal reflux disease	Number	2021	24002365.5826616	32344764.862719	17652103.2603143
Incidence	Global	Both	20-24 years	Gastroesophageal reflux disease	Rate	2021	4019.43204873505	5416.44881002582	2956.01820277832
Incidence	Global	Both	25-29 years	Gastroesophageal reflux disease	Number	1990	20297772.4593763	26847952.1004808	14144019.6694522
Incidence	Global	Both	25-29 years	Gastroesophageal reflux disease	Rate	1990	4585.82720584766	6065.6936326432	3195.52454980133
Incidence	Global	Both	25-29 years	Gastroesophageal reflux disease	Number	2021	29722567.458086	39356284.4893234	20801564.0002916
Incidence	Global	Both	25-29 years	Gastroesophageal reflux disease	Rate	2021	5051.90958560901	6689.34105863988	3535.61719447435
Incidence	Global	Both	30-34 years	Gastroesophageal reflux disease	Number	1990	20310945.961363	26704154.7707702	14617312.4118317
Incidence	Global	Both	30-34 years	Gastroesophageal reflux disease	Rate	1990	5269.78747871373	6928.54093100026	3792.54270415811
Incidence	Global	Both	30-34 years	Gastroesophageal reflux disease	Number	2021	33522168.315728	43956860.9141117	24071422.978373
Incidence	Global	Both	30-34 years	Gastroesophageal reflux disease	Rate	2021	5545.6191475852	7271.84492533754	3982.16914017033
Incidence	Global	Both	35-39 years	Gastroesophageal reflux disease	Number	1990	19522384.8438694	26253136.4159027	13960346.5878984
Incidence	Global	Both	35-39 years	Gastroesophageal reflux disease	Rate	1990	5542.28282486068	7453.10105400746	3963.25498867055
Incidence	Global	Both	35-39 years	Gastroesophageal reflux disease	Number	2021	33735408.7758832	45233387.5177223	24227426.3831095
Incidence	Global	Both	35-39 years	Gastroesophageal reflux disease	Rate	2021	6014.87742263795	8064.91728430697	4319.64529994267
Incidence	Global	Both	40-44 years	Gastroesophageal reflux disease	Number	1990	16544235.4473123	22280695.3185639	11529047.6421723
Incidence	Global	Both	40-44 years	Gastroesophageal reflux disease	Rate	1990	5774.9724356068	7777.35554602272	4024.35836665746
Incidence	Global	Both	40-44 years	Gastroesophageal reflux disease	Number	2021	30834954.3849658	41502712.5174292	21577188.9427851
Incidence	Global	Both	40-44 years	Gastroesophageal reflux disease	Rate	2021	6163.89911936701	8296.3811116339	4313.27428808181
Incidence	Global	Both	45-49 years	Gastroesophageal reflux disease	Number	1990	13723391.4329341	18253325.3728331	9195627.74998036
Incidence	Global	Both	45-49 years	Gastroesophageal reflux disease	Rate	1990	5910.27469474243	7861.18850964596	3960.2955478302
Incidence	Global	Both	45-49 years	Gastroesophageal reflux disease	Number	2021	28325529.260135	37494054.9066324	19040923.3849146
Incidence	Global	Both	45-49 years	Gastroesophageal reflux disease	Rate	2021	5982.10190789659	7918.41364487451	4021.27505060668
Incidence	Global	Both	50-54 years	Gastroesophageal reflux disease	Number	1990	13520146.5584691	17626729.3066252	9286612.82263684
Incidence	Global	Both	50-54 years	Gastroesophageal reflux disease	Rate	1990	6360.28284650659	8292.14266014862	4368.70147690568
Incidence	Global	Both	50-54 years	Gastroesophageal reflux disease	Number	2021	27743413.1814367	36050677.4668188	19142939.8398262
Incidence	Global	Both	50-54 years	Gastroesophageal reflux disease	Rate	2021	6235.5540737134	8102.67818412344	4302.52888209689
Incidence	Global	Both	55-59 years	Gastroesophageal reflux disease	Number	1990	12340485.2872547	16156927.2075965	8682886.6190009
Incidence	Global	Both	55-59 years	Gastroesophageal reflux disease	Rate	1990	6663.33046918543	8724.04470689491	4688.38474517902
Incidence	Global	Both	55-59 years	Gastroesophageal reflux disease	Number	2021	25879654.9216471	33725178.9585455	18245818.2495834
Incidence	Global	Both	55-59 years	Gastroesophageal reflux disease	Rate	2021	6539.75828370654	8522.31295708467	4610.69675781915
Incidence	Global	Both	60-64 years	Gastroesophageal reflux disease	Number	1990	11097988.4405177	14301482.3878006	8037169.30336198
Incidence	Global	Both	60-64 years	Gastroesophageal reflux disease	Rate	1990	6909.93162144737	8904.52048267099	5004.17626256209
Incidence	Global	Both	60-64 years	Gastroesophageal reflux disease	Number	2021	22190207.8810095	28509700.7406293	16185733.4029266
Incidence	Global	Both	60-64 years	Gastroesophageal reflux disease	Rate	2021	6933.40313059985	8907.94937242162	5057.28541384896
Incidence	Global	Both	65-69 years	Gastroesophageal reflux disease	Number	1990	8659159.19008697	11213814.5333462	6432936.16747471
Incidence	Global	Both	65-69 years	Gastroesophageal reflux disease	Rate	1990	7005.25621368068	9071.97133281912	5204.24270649778
Incidence	Global	Both	65-69 years	Gastroesophageal reflux disease	Number	2021	18842750.5554576	24323865.5071235	14039061.597294
Incidence	Global	Both	65-69 years	Gastroesophageal reflux disease	Rate	2021	6830.99010549919	8818.03769134589	5089.52716745656
Incidence	Global	Both	70-74 years	Gastroesophageal reflux disease	Number	1990	5994000.01539776	7780993.99954149	4205468.71008639
Incidence	Global	Both	70-74 years	Gastroesophageal reflux disease	Rate	1990	7079.98851250123	9190.74874726023	4967.41242586053
Incidence	Global	Both	70-74 years	Gastroesophageal reflux disease	Number	2021	14307249.7140062	18452514.482216	10085176.4874051
Incidence	Global	Both	70-74 years	Gastroesophageal reflux disease	Rate	2021	6950.69175212413	8964.52796877728	4899.5407524829
Incidence	Global	Both	75-79 years	Gastroesophageal reflux disease	Number	1990	4298070.38622418	5572472.36682288	2925236.73781615
Incidence	Global	Both	75-79 years	Gastroesophageal reflux disease	Rate	1990	6982.42948907187	9052.75900223771	4752.19282729972
Incidence	Global	Both	75-79 years	Gastroesophageal reflux disease	Number	2021	8990581.12118666	11619424.3016771	6112781.43854888
Incidence	Global	Both	75-79 years	Gastroesophageal reflux disease	Rate	2021	6817.01612090021	8810.30955757148	4634.95396442484
Incidence	China	Both	<5 years	Gastroesophageal reflux disease	Number	1990	0	0	0
Incidence	China	Both	<5 years	Gastroesophageal reflux disease	Rate	1990	0	0	0
Incidence	China	Both	<5 years	Gastroesophageal reflux disease	Number	2021	0	0	0
Incidence	China	Both	<5 years	Gastroesophageal reflux disease	Rate	2021	0	0	0
Incidence	China	Both	5-9 years	Gastroesophageal reflux disease	Number	1990	19905.5332071115	33887.5413759596	10415.3160176524
Incidence	China	Both	5-9 years	Gastroesophageal reflux disease	Rate	1990	19.0889	32.4973	9.98803
Incidence	China	Both	5-9 years	Gastroesophageal reflux disease	Number	2021	18213.1576671943	31003.2263435445	9527.49107332944
Incidence	China	Both	5-9 years	Gastroesophageal reflux disease	Rate	2021	19.0175	32.3725	9.94826
Incidence	China	Both	10-14 years	Gastroesophageal reflux disease	Number	1990	338493.807883588	502390.890693922	208806.518397255
Incidence	China	Both	10-14 years	Gastroesophageal reflux disease	Rate	1990	330.908	491.132	204.12707358746
Incidence	China	Both	10-14 years	Gastroesophageal reflux disease	Number	2021	282221.289716634	419040.760009216	174037.286381297
Incidence	China	Both	10-14 years	Gastroesophageal reflux disease	Rate	2021	327.42965051089	486.16590809785	201.91590759474
Incidence	China	Both	15-19 years	Gastroesophageal reflux disease	Number	1990	1429769.45644809	2035388.91376991	974967.399598704
Incidence	China	Both	15-19 years	Gastroesophageal reflux disease	Rate	1990	1128.77838436608	1606.90452525781	769.71998608964
Incidence	China	Both	15-19 years	Gastroesophageal reflux disease	Number	2021	833205.825628991	1186358.68553755	568595.806665565
Incidence	China	Both	15-19 years	Gastroesophageal reflux disease	Rate	2021	1115.81864210267	1588.75645947855	761.45627092789
Incidence	China	Both	20-24 years	Gastroesophageal reflux disease	Number	1990	2443686.40587931	3317420.48909475	1750479.90327458
Incidence	China	Both	20-24 years	Gastroesophageal reflux disease	Rate	1990	1851.2648647049	2513.18007831835	1326.11203037658
Incidence	China	Both	20-24 years	Gastroesophageal reflux disease	Number	2021	1336326.75645345	1.8192e+06	957221.902475161
Incidence	China	Both	20-24 years	Gastroesophageal reflux disease	Rate	2021	1826.22772788625	2486.12399260138	1308.14201810907
Incidence	China	Both	25-29 years	Gastroesophageal reflux disease	Number	1990	2425072.97342557	3294277.06685813	1659184.38479162
Incidence	China	Both	25-29 years	Gastroesophageal reflux disease	Rate	1990	2206.82950402702	2997.80992376198	1509.86675168249
Incidence	China	Both	25-29 years	Gastroesophageal reflux disease	Number	2021	1888824.68756805	2564653.6945457	1283382.81767806
Incidence	China	Both	25-29 years	Gastroesophageal reflux disease	Rate	2021	2184.0650528095	2965.53224006621	1483.98714815392
Incidence	China	Both	30-34 years	Gastroesophageal reflux disease	Number	1990	2190796.08624377	2968344.64248497	1526836.11210682
Incidence	China	Both	30-34 years	Gastroesophageal reflux disease	Rate	1990	2482.64822390077	3363.77976976661	1730.23723463406
Incidence	China	Both	30-34 years	Gastroesophageal reflux disease	Number	2021	2993290.03276725	4079342.3706622	2087319.41399861
Incidence	China	Both	30-34 years	Gastroesophageal reflux disease	Rate	2021	2470.66364614177	3367.09199076285	1722.87487600548
Incidence	China	Both	35-39 years	Gastroesophageal reflux disease	Number	1990	2428329.17136945	3458284.13442035	1681735.54276282
Incidence	China	Both	35-39 years	Gastroesophageal reflux disease	Rate	1990	2658.58797909699	3786.20523793599	1841.20091737314
Incidence	China	Both	35-39 years	Gastroesophageal reflux disease	Number	2021	2801739.21148667	3997655.40967446	1939710.02344435
Incidence	China	Both	35-39 years	Gastroesophageal reflux disease	Rate	2021	2644.06675187718	3772.68080870863	1830.54966723712
Incidence	China	Both	40-44 years	Gastroesophageal reflux disease	Number	1990	1808118.2376546	2543693.05023081	1212800.28353197
Incidence	China	Both	40-44 years	Gastroesophageal reflux disease	Rate	1990	2694.88955348591	3791.21878513522	1807.60458386538
Incidence	China	Both	40-44 years	Gastroesophageal reflux disease	Number	2021	2456342.62625079	3459370.17592549	1641528.98682783
Incidence	China	Both	40-44 years	Gastroesophageal reflux disease	Rate	2021	2683.5395470744	3779.34111302514	1793.36054618127
Incidence	China	Both	45-49 years	Gastroesophageal reflux disease	Number	1990	1393940.40089171	1952456.91825716	900897.550118851
Incidence	China	Both	45-49 years	Gastroesophageal reflux disease	Rate	1990	2700.44284443174	3782.44171027394	1745.28433298026
Incidence	China	Both	45-49 years	Gastroesophageal reflux disease	Number	2021	2972906.45902915	4169108.43224238	1915399.81064538
Incidence	China	Both	45-49 years	Gastroesophageal reflux disease	Rate	2021	2694.76468054642	3779.05134500731	1736.19716260365
Incidence	China	Both	50-54 years	Gastroesophageal reflux disease	Number	1990	1409052.5940954	1971447.96539417	924227.794480215
Incidence	China	Both	50-54 years	Gastroesophageal reflux disease	Rate	1990	2953.31525851842	4132.07241658113	1937.14277183357
Incidence	China	Both	50-54 years	Gastroesophageal reflux disease	Number	2021	3571882.97862909	4999131.58927381	2337815.90488654
Incidence	China	Both	50-54 years	Gastroesophageal reflux disease	Rate	2021	2955.41249532604	4136.33258791403	1934.33278145227
Incidence	China	Both	55-59 years	Gastroesophageal reflux disease	Number	1990	1388458.27775663	1990763.00522336	908868.821299742
Incidence	China	Both	55-59 years	Gastroesophageal reflux disease	Rate	1990	3201.49186243938	4590.27949443729	2095.65975588214
Incidence	China	Both	55-59 years	Gastroesophageal reflux disease	Number	2021	3531994.92673802	5064125.55316307	2310986.11377511
Incidence	China	Both	55-59 years	Gastroesophageal reflux disease	Rate	2021	3212.58744725204	4606.16351972658	2101.99763416546
Incidence	China	Both	60-64 years	Gastroesophageal reflux disease	Number	1990	1192507.6042762	1641750.35910373	831315.585480583
Incidence	China	Both	60-64 years	Gastroesophageal reflux disease	Rate	1990	3374.62721898297	4645.92043584429	2352.50508446886
Incidence	China	Both	60-64 years	Gastroesophageal reflux disease	Number	2021	2474547.08939068	3416667.57077822	1720518.46970175
Incidence	China	Both	60-64 years	Gastroesophageal reflux disease	Rate	2021	3389.55065030648	4680.03532285338	2356.70782861435
Incidence	China	Both	65-69 years	Gastroesophageal reflux disease	Number	1990	983133.90803119	1346550.25790213	686823.933730402
Incidence	China	Both	65-69 years	Gastroesophageal reflux disease	Rate	1990	3603.62401372021	4935.70693210523	2517.51587507053
Incidence	China	Both	65-69 years	Gastroesophageal reflux disease	Number	2021	2761834.59492999	3782533.12022213	1927755.09009243
Incidence	China	Both	65-69 years	Gastroesophageal reflux disease	Rate	2021	3600.66250304396	4931.36887976846	2513.25531249777
Incidence	China	Both	70-74 years	Gastroesophageal reflux disease	Number	1990	712751.78124778	970950.67355612	480353.178786756
Incidence	China	Both	70-74 years	Gastroesophageal reflux disease	Rate	1990	3787.67671340444	5159.78683301863	2552.67345149979
Incidence	China	Both	70-74 years	Gastroesophageal reflux disease	Number	2021	2009814.53689601	2737557.24609412	1353740.74613964
Incidence	China	Both	70-74 years	Gastroesophageal reflux disease	Rate	2021	3771.01069895019	5136.47278119162	2540.02085445237
Incidence	China	Both	75-79 years	Gastroesophageal reflux disease	Number	1990	434212.204344936	609731.212738424	281494.977025278
Incidence	China	Both	75-79 years	Gastroesophageal reflux disease	Rate	1990	3815.33925905006	5357.59108138997	2473.44230844501
Incidence	China	Both	75-79 years	Gastroesophageal reflux disease	Number	2021	1259812.79644274	1770322.43569203	817083.698423159
Incidence	China	Both	75-79 years	Gastroesophageal reflux disease	Rate	2021	3803.90469504626	5345.34801034682	2467.11934142422
Incidence	China	Both	80-84 years	Gastroesophageal reflux disease	Number	1990	192515.343403836	274109.377245343	128313.245811946
Incidence	China	Both	80-84 years	Gastroesophageal reflux disease	Rate	1990	3634.33607404093	5174.68156221668	2422.31839699871
Incidence	China	Both	80-84 years	Gastroesophageal reflux disease	Number	2021	718345.017578906	1021945.87507072	478765.823748901
Incidence	China	Both	80-84 years	Gastroesophageal reflux disease	Rate	2021	3629.49800695747	5163.46661565054	2419.00418402375
Incidence	China	Both	85-89 years	Gastroesophageal reflux disease	Number	1990	59541.7031012982	82522.4807249612	41395.1835669631
Incidence	China	Both	85-89 years	Gastroesophageal reflux disease	Rate	1990	3529.74519222469	4892.08931585022	2453.98506536104
Incidence	China	Both	85-89 years	Gastroesophageal reflux disease	Number	2021	336596.313672376	466443.007239145	234471.24176511
Incidence	China	Both	85-89 years	Gastroesophageal reflux disease	Rate	2021	3533.54094728433	4896.65334617486	2461.44624906394
Incidence	China	Both	90-94 years	Gastroesophageal reflux disease	Number	1990	11688.5188729314	15882.4082002813	8142.04234998681
Incidence	China	Both	90-94 years	Gastroesophageal reflux disease	Rate	1990	3809.54303720787	5176.42296951695	2653.66904739957
Incidence	China	Both	90-94 years	Gastroesophageal reflux disease	Number	2021	112091.232274679	152239.009711372	78064.6455247632
Incidence	China	Both	90-94 years	Gastroesophageal reflux disease	Rate	2021	3823.04605537235	5192.34853377848	2662.51631890484
Incidence	China	Both	95+ years	Gastroesophageal reflux disease	Number	1990	1772.97679870637	2813.59495095961	1084.23224175412
Incidence	China	Both	95+ years	Gastroesophageal reflux disease	Rate	1990	4378.57609717072	6948.50581709851	2677.63987717733
Incidence	China	Both	95+ years	Gastroesophageal reflux disease	Number	2021	27876.376528141	44314.3224683478	17002.1793383767
Incidence	China	Both	95+ years	Gastroesophageal reflux disease	Rate	2021	4361.82820849902	6933.88043413157	2660.33805969101
