# Supplementary material for: Burden of Gastroesophageal reflux disease in China and Global from 1990 to 2021 with forecast to 2041: An analysis and comparison
Source: Research Square preprint supplement (doi:10.21203/rs.3.rs-7227485/v1), 2025-07-29
Supplement: Supplementary file 6 [file cbb2b15a1073ff975a5563e6.xlsx]

## Sheet: Sheet1
	location	year	ASDR	ASIR	ASPR	SDI
1	China	1990	35.2685377220852	1851.78875796251	4562.63269491823	0.458668935267616
2	China	1991	34.7206164260271	1825.8802743068	4490.16748615277	0.467301969740226
3	China	1992	34.2398086174471	1803.41704149387	4427.36315116395	0.475784030669638
4	China	1993	33.8647391836059	1785.32981774875	4376.88590397579	0.484353830709851
5	China	1994	33.5916605804881	1772.5709844555	4341.47901028757	0.49257864459854
6	China	1995	33.4574995130258	1766.0968458401	4323.91147577486	0.501500907580649
7	China	1996	33.4671002202467	1765.87194448345	4324.01091416328	0.512033995790715
8	China	1997	33.5576127257801	1769.60556388384	4335.24698102944	0.522326866102753
9	China	1998	33.6815031264215	1774.88119186072	4350.76086949619	0.531379484348035
10	China	1999	33.7842375379653	1779.36646117108	4363.96409981497	0.540333688117168
11	China	2000	33.8215965608351	1780.78045511906	4368.42074663495	0.547989192872889
12	China	2001	33.802540303361	1779.57391350358	4365.66583149862	0.553680373692626
13	China	2002	33.7772865450818	1777.69054064561	4361.39313114163	0.560542936414416
14	China	2003	33.7260801594154	1775.07114424626	4355.34655928267	0.569018827276063
15	China	2004	33.6716588058759	1771.69602253032	4347.40580485955	0.578178090807068
16	China	2005	33.6014767575058	1767.50769726621	4337.34585030276	0.58805219357166
17	China	2006	33.314792300126	1753.31038899915	4299.69118022129	0.598758170327953
18	China	2007	32.7413514978531	1726.14267691289	4226.20081534231	0.609520246163436
19	China	2008	32.0860295871042	1695.23155008558	4142.18439050837	0.619454832781724
20	China	2009	31.5523418536684	1669.79041034616	4072.96130045734	0.62930772749348
21	China	2010	31.3308568163117	1658.95747452557	4043.64454213307	0.64152144342547
22	China	2011	31.3631032586986	1660.83716850683	4048.41638381646	0.651447977618785
23	China	2012	31.4761137001178	1666.78	4063.22251557632	0.657144292359298
24	China	2013	31.6462864840383	1675.72266990403	4085.64535012868	0.66310300729639
25	China	2014	31.8536374573193	1686.63729782628	4113.37112193519	0.668640847002655
26	China	2015	32.0889864108067	1698.49	4144.0966732372	0.671940110944872
27	China	2016	32.701927921128	1728.18840875735	4224.22231240158	0.676218437253933
28	China	2017	33.747908505773	1777.87752837571	4359.47214163914	0.6846196607825
29	China	2018	34.7223359867082	1824.45335553998	4486.50475202211	0.693717996192013
30	China	2019	35.1423153236508	1844.87649462932	4542.2399406439	0.703686823937232
31	China	2020	35.1265192027147	1844.58145079052	4541.42803326504	0.713364584593745
32	China	2021	35.1173276008108	1844.30993186486	4540.66476510182	0.721629759719777
33	Global	1990	73.0111808861787	3739.85850258324	9516.49130160769	0.525528856259782
34	Global	1991	72.8748193628326	3732.66310604766	9496.71056380454	0.530272484697146
35	Global	1992	72.7631754449309	3727.36645477741	9481.45901496402	0.53463654369733
36	Global	1993	72.6919896614673	3723.86055438254	9470.68375522815	0.53859831913168
37	Global	1994	72.6487749116031	3722.10902432828	9464.3076573793	0.542389432850516
38	Global	1995	72.6585740637614	3723.0449962615	9464.8730012891	0.546327999247608
39	Global	1996	72.7335653313468	3726.83213510797	9474.07085465216	0.550703412878607
40	Global	1997	72.8593397440604	3732.7861829097	9490.7203561608	0.555139426186759
41	Global	1998	73.0076918598104	3739.3131017296	9509.59255340355	0.559380566586927
42	Global	1999	73.1333723868491	3745.05643550516	9526.19887672381	0.563738017262722
43	Global	2000	73.2294	3749.67635362274	9538.38230898533	0.568003163917294
44	Global	2001	73.2130114645067	3750.36316293619	9535.99073094729	0.571777530944842
45	Global	2002	73.0895235270382	3747.0678735251	9518.67140978924	0.575687959504698
46	Global	2003	72.9077260938947	3741.77113183868	9494.45807248411	0.57990707651198
47	Global	2004	72.7356571799251	3736.45056516335	9471.14512499888	0.584378588475938
48	Global	2005	72.6539156741361	3734.03616113493	9459.37936222084	0.588978519610727
49	Global	2006	72.572741396198	3730.87357319003	9447.58264877285	0.593756623068011
50	Global	2007	72.4201351988711	3724.47357666138	9426.1994433722	0.598641367955262
51	Global	2008	72.2642892631732	3717.93708701595	9404.38033743881	0.603370099117126
52	Global	2009	72.1790310841111	3714.38981588762	9391.39946845764	0.607759439561568
53	Global	2010	72.243959813432	3717.75057485233	9398.69546527621	0.612952497086985
54	Global	2011	72.4368322277462	3727.24087117097	9423.55614011351	0.617759222946913
55	Global	2012	72.6776216007575	3739.02707186983	9454.49066357264	0.62184497734573
56	Global	2013	72.9421663268513	3752.05380353781	9488.67152198283	0.626343278773449
57	Global	2014	73.2160483580597	3765.61007957682	9523.9090398583	0.630982367479298
58	Global	2015	73.4940411999629	3779.26702212664	9559.35794990961	0.635441487987777
59	Global	2016	73.9022717125873	3798.58538970281	9611.83624845964	0.64015358571632
60	Global	2017	74.466243867179	3824.47377875971	9684.19935991486	0.64556430373454
61	Global	2018	75.0000539231993	3849.04719345568	9752.96131167033	0.651048473596689
62	Global	2019	75.3353107067788	3864.96303733763	9796.10470544101	0.656575898294859
63	Global	2020	75.4492487518907	3873.80759947778	9818.35157019745	0.661343542527028
64	Global	2021	75.5613129047795	3881.85801899819	9838.59948915377	0.665820974847562
