# Supplementary material for: Burden of Gastroesophageal reflux disease in China and Global from 1990 to 2021 with forecast to 2041: An analysis and comparison
Source: Research Square preprint supplement (doi:10.21203/rs.3.rs-7227485/v1), 2025-07-29
Supplement: Supplementary file 7 [file def65c8739928792674742f9.xlsx]

## Sheet: Sheet1
Age-standardized Prevalence rate per 100,000（ASPR）
	location_name	Joinpoint.Model	AAPC.Index	Start.Obs	End.Obs	val	lower	upper	Statistically.Significant..0.No..1.Yes.	Test.Statistic	P.Value	AAPC
1	China	5	0	1990	2021	0	-0.09	0.1	0	0.0792	0.936889	0.00 (-0.09 - 0.10)
2	Global	5	0	1990	2021	0.11	0.1	0.12	1	15.8503	0	0.11 (0.10 - 0.12)
Age-standardized Incidence rate per 100,000（ASIR）
	location_name	Joinpoint.Model	AAPC.Index	Start.Obs	End.Obs	val	lower	upper	Statistically.Significant..0.No..1.Yes.	Test.Statistic	P.Value	AAPC
1	China	5	0	1990	2021	0	-0.08	0.09	0	0.0927	0.926164	0.00 (-0.08 - 0.09)
2	Global	5	0	1990	2021	0.12	0.11	0.13	1	23.9682	0	0.12 (0.11 - 0.13)
Age-standardized DALYs rate per 100,000（ASDR）
	location_name	Joinpoint.Model	AAPC.Index	Start.Obs	End.Obs	val	lower	upper	Statistically.Significant..0.No..1.Yes.	Test.Statistic	P.Value	AAPC
1	China	5	0	1990	2021	0	-0.09	0.1	0	0.1002	0.920179	0.00 (-0.09 - 0.10)
2	Global	5	0	1990	2021	0.11	0.1	0.13	1	16.0611	0	0.11 (0.10 - 0.13)
